# Supplementary material for: Transcriptomics- and Genomics-Guided Drug Repurposing for the Treatment of Vesicular Hand Eczema
Source: MDPI journal article supplement (doi:10.3390/pharmaceutics16040476), 2024-03-30
Supplement: s1 [file s1]

A

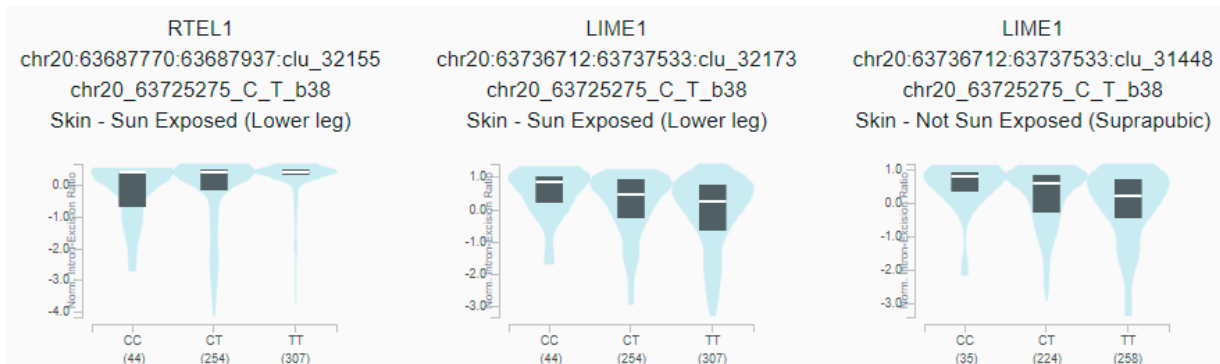

B

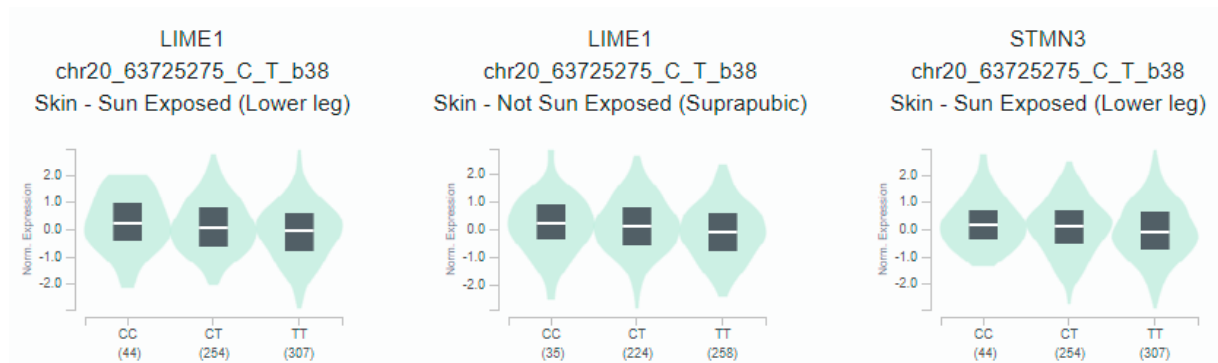

**Supplementary Figure S1.** Splicing-Quantitative Trait Locus (QTL) A) and expression-QTL (B) genes associated with hand eczema identified in skin tissue based on the GTEx database.

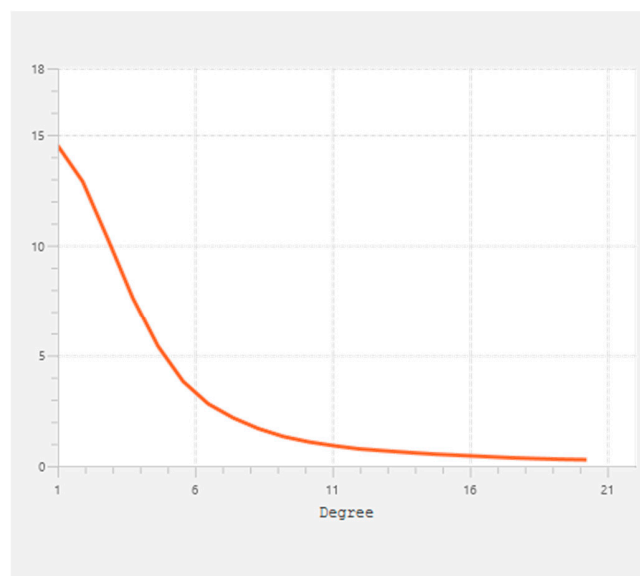

**Supplementary Figure S2.** The distribution of node degrees for the constructed (vesicular) hand eczema network. Y-axis shows the number of nodes with a certain calculated degree of centrality.

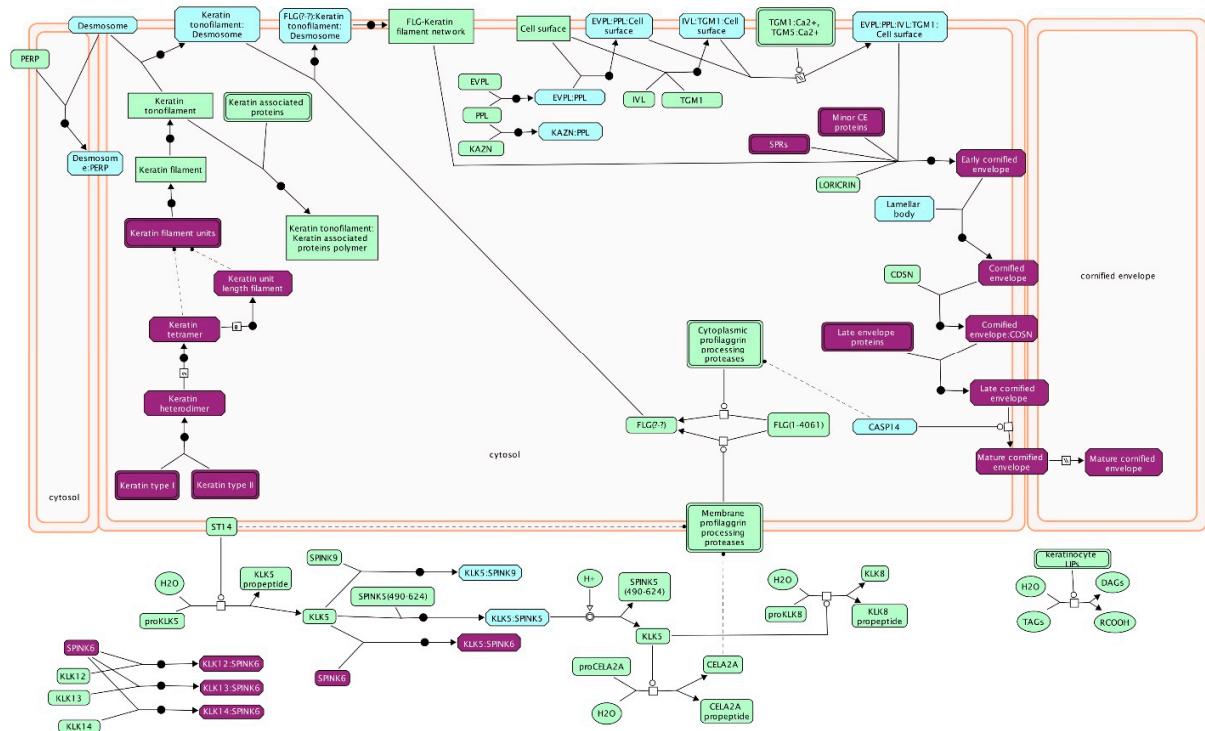

**Supplementary Figure S3.** Reactome diagram of the keratinization pathway with nodes involving our (vesicular) hand eczema genes highlighted in purple.

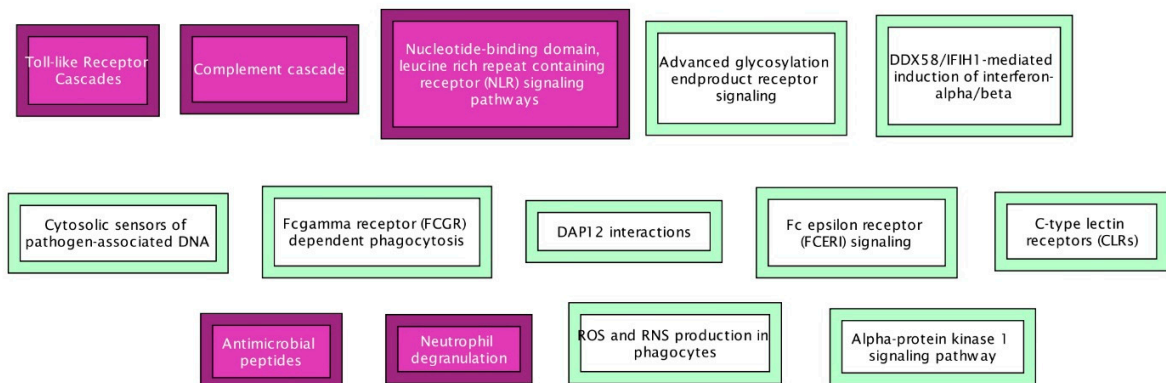

**Supplementary Figure S4.** Immune pathways involving our (vesicular) hand eczema genes highlighted in purple.
