# Supplementary material for: Transcriptomics- and Genomics-Guided Drug Repurposing for the Treatment of Vesicular Hand Eczema
Source: Pharmaceutics. 2024 Mar 30;16(4):476. doi: 10.3390/pharmaceutics16040476 (PMC11054470; doi:10.3390/pharmaceutics16040476)
Supplement: Supplementary file 1 [file pharmaceutics-16-00476-s001.zip › Supplementary Tables.xlsx]

## Sheet: Legend
Sheet	Title
ST1	Table S1. sQTL (A) and eQTL (B) lookup results of the (V)HE GWAS locus in skin based on GTEx database.
ST2	Table S2. Node centrality parameters calculated for VHE combined network through network analysis with Cytoscape.
ST3	Table S3. Centrality parameters calculated for interactions in the (V)HE combined network through network analysis with Cytoscape.
ST4	Table S4. Functional enrichment results of the 52 VHE DEGs (A) and the three HE QTLs (B) in Reactome pathways.
ST5	Table S5. Functional enrichment of the combined (V)HE network, including 52 VHE genes, 3 HE genes, and 23 linker genes, in Reactome pathways.
ST6	Table S6. Functional enrichment results of the 11 identified modules within the combined (V)HE network.
ST7	Table S7. Functional enrichment results of the combined (V)HE network in functional categories from 12 different databases using STRING.
ST8	Table S8. Functional enrichment results of the combined (V)HE network in functional categories from 12 different databases using STRING.
ST9	Table S9. Drugs targeting (V)HE genes based on DrugBank database.
ST10	Table S10. Results of the pharmaco-transcriptomic lookups based on DrugBank database.
ST11	Table S11. Ranking system of drugs targeting (V)HE genes based on DrugBank database.
ST12	Table S12. Ranking system of results of the pharmaco-transcriptomic lookups based on DrugBank database.
ST13	Table S13. Total ranking score of drug repurposing candidates for treatment of (V)HE with and without pricing criteria
Abbreviations
s/eQTL	splicing/expression quantitative trait locus
GWAS	Genome-wide association study
GTEx	genotype-tissue expression
VHE	Vesicular hand eczema
HE	Hand eczema

## Sheet: ST1
Table S1. sQTL (A) and eQTL (B) lookup results of the VHE GWAS locus in skin based on GTEx database.
A)
Gene Id	Gene Symbol	Variant Id	SNP Id	P-Value	NES	Tissue	Ensembl Intron Id
ENSG00000258366.7	RTEL1	chr20_63725275_C_T_b38	rs6011058	1.8e-07	0.31	Skin - Sun Exposed (Lower leg)	63687770:63687937:clu_32155
ENSG00000203896.9	LIME1	chr20_63725275_C_T_b38	rs6011058	2.8e-07	-0.3	Skin - Sun Exposed (Lower leg)	63736712:63737533:clu_32173
ENSG00000203896.9	LIME1	chr20_63725275_C_T_b38	rs6011058	0.0000018	-0.29	Skin - Not Sun Exposed (Suprapubic)	63736712:63737533:clu_31448
B)
Gene Id	Gene Symbol	Variant Id	SNP Id	P-Value	NES	Tissue
ENSG00000197457.9	STMN3	chr20_63725275_C_T_b38	rs6011058	2.9e-07	-0.12	Skin - Sun Exposed (Lower leg)
ENSG00000203896.9	LIME1	chr20_63725275_C_T_b38	rs6011058	5.1e-14	-0.2	Skin - Sun Exposed (Lower leg)
ENSG00000203896.9	LIME1	chr20_63725275_C_T_b38	rs6011058	8.2e-11	-0.18	Skin - Not Sun Exposed (Suprapubic)
NES: Normalized effect size

## Sheet: ST2
Table S2. Node centrality parameters calculated for (V)HE combined network through network analysis with Cytoscape.
Node	nodeType	Degree	Indegree	Outdegree	AverageShortestPathLength	BetweennessCentrality	ClosenessCentrality	ClusteringCoefficient	Eccentricity	NeighborhoodConnectivity	Radiality	Stress	TopologicalCoefficient
STAT3	Linker gene	22	22	0	2.07246	0.289244	0.482517	0.207792	5	7.31818	0.951252	3820	0.156126
NFKB1	Linker gene	18	12	6	2.07246	0.292711	0.482517	0.235294	4	7.94444	0.951252	4622	0.167874
JUN	Linker gene	17	9	8	2.11594	0.236113	0.472603	0.272059	5	8.23529	0.949275	3910	0.175192
STAT1	Linker gene	14	12	2	2.27536	0.0752592	0.43949	0.362637	5	9.64286	0.942029	1544	0.214286
FOS	Linker gene	13	5	8	2.30435	0.0736607	0.433962	0.410256	5	10.6154	0.940711	1520	0.230769
EP300	Linker gene	13	4	9	2.33333	0.107972	0.428571	0.346154	5	9.61538	0.939394	1854	0.221825
CREB1	Linker gene	10	1	9	2.37681	0.0637558	0.420732	0.422222	5	11.1	0.937418	1236	0.261905
EGFR	Linker gene	9	0	9	2.66667	0.0546839	0.375	0.194444	6	8.33333	0.924242	1064	0.25
CXCR4	Linker gene	9	2	7	2.71014	0.0437414	0.368984	0.333333	6	9.77778	0.922266	1084	0.302083
BRCA1	Linker gene	8	0	8	2.46377	0.0414328	0.405882	0.607143	5	12.75	0.933465	570	0.323718
KRT16	Gene	7	2	5	2.72464	0.0619423	0.367021	0.380952	5	8.85714	0.921607	854	0.305419
BCL3	Linker gene	7	0	7	2.53623	0.0392923	0.394286	0.619048	5	13.1429	0.930171	614	0.361111
TGM1	Linker gene	7	7	0	3.52174	0.074453	0.283951	0.380952	6	3.71429	0.885375	1806	0.396825
RAC2	Linker gene	6	4	2	2.84058	0.0421322	0.352041	0.133333	5	6.66667	0.916337	708	0.263889
CCL22	Gene	6	2	4	2.57971	0.00382089	0.38764	0.666667	5	13.5	0.928195	202	0.375
ERBB2	Linker gene	6	2	4	2.81159	0.0622732	0.35567	0.333333	6	9.83333	0.917655	1050	0.333333
LCE1A	Linker gene	6	0	6	3.53623	0.0454675	0.282787	0.533333	6	4.33333	0.884717	1438	0.433333
KRT17	Gene	5	2	3	3.26087	0.0115378	0.306667	0.4	6	5	0.897233	134	0.342857
IL4R	Gene	5	1	4	2.6087	0	0.383333	1	5	16.8	0.926877	0	0.48
SPRR2A	Gene	5	4	1	2.71014	0.208014	0.368984	0.4	5	10.6	0.922266	4956	0.365517
S100A9	Gene	5	4	1	2.84058	0.0102559	0.352041	0.5	6	8.8	0.916337	292	0.303448
PI3	Gene	5	1	4	3.56522	0.0177607	0.280488	0.7	6	4.8	0.883399	714	0.533333
S100A8	Gene	4	2	2	2.94203	0.00768718	0.339901	0.5	6	9	0.911726	246	0.346154
KRT6A	Gene	4	3	1	3.2029	0.00404657	0.312217	0.666667	6	7	0.899868	92	0.4375
SLC9A1	Linker gene	4	4	0	3.07246	0.0299908	0.325472	0.166667	6	8.25	0.905797	546	0.407895
NNMT	Linker gene	4	2	2	2.71014	0.0571185	0.368984	0.5	5	13.75	0.922266	640	0.45
LAPTM5	Gene	3	2	1	3.17391	0.0014371	0.315068	0.666667	6	9.33333	0.901186	32	0.491228
TNC	Gene	3	3	0	2.78261	0.0031494	0.359375	0.333333	5	14.6667	0.918972	160	0.530864
LCE1E	Gene	3	2	1	4.46377	0.0289855	0.224026	0.333333	7	4.66667	0.842556	730	0.619048
CHI3L1	Linker gene	3	0	3	2.92754	0.0289855	0.341584	0.333333	6	12	0.912385	362	0.448718
SPRR2B	Gene	3	2	1	4.47826	0	0.223301	1	7	6	0.841897	0	0.857143
SMARCD1	Linker gene	3	2	1	3.10145	0.0294237	0.32243	0.333333	6	9.33333	0.90448	470	0.473684
SPRR2D	Gene	3	2	1	4.47826	0	0.223301	1	7	6	0.841897	0	0.857143
BIRC3	Gene	3	0	3	2.68116	0.084399	0.372973	0.333333	5	14	0.923584	702	0.455556
S100A7	Gene	3	1	2	3.56522	0.000639894	0.280488	0.666667	7	6	0.883399	14	0.545455
KRT6B	Gene	3	3	0	3.56522	0	0.280488	1	6	5.33333	0.883399	0	0.666667
rs8114049	SNP	3	0	3	4.2029	0.00234442	0.237931	0	7	2	0.854414	22	0.333333
TNS2	Linker gene	2	2	0	3.76812	0.0289855	0.265385	0	7	3.5	0.874177	492	0.5
LYZ	Gene	2	1	1	3.02899	0.0289855	0.330144	0	5	9.5	0.907773	240	0.5
C1R	Gene	2	0	2	3.66667	0.0289855	0.272727	0	6	2.5	0.878788	322	0.5
PARP9	Gene	2	0	2	3.02899	0	0.330144	1	6	18	0.907773	0	0.782609
LIME1	Gene	2	2	0	3.43478	0.0122239	0.291139	0	6	5	0.889328	250	0.5
CDH3	Gene	2	0	2	3.02899	0.00294219	0.330144	0	6	12	0.907773	44	0.52381
MMP12	Gene	2	2	0	3.07246	0.00250071	0.325472	0	6	9.5	0.905797	46	0.53125
RTEL1	Gene	2	2	0	3.36232	0.013908	0.297414	0	6	5.5	0.892622	258	0.5
SERPINB3	Gene	2	0	2	3.02899	0.0289855	0.330144	0	6	11.5	0.907773	236	0.5
DMD	Linker gene	2	0	2	3.07246	0.0289855	0.325472	0	6	9	0.905797	224	0.5
TYMP	Gene	2	2	0	3.18841	0	0.313636	1	6	10	0.900527	0	0.625
KRT6C	Gene	2	2	0	3.57971	0	0.279352	1	6	6	0.88274	0	0.75
KLK13	Linker gene	2	1	1	4.56522	0.0289855	0.219048	0	7	1.5	0.837945	238	0.5
CASP7	Linker gene	2	1	1	3.6087	0.0571185	0.277108	0	6	2.5	0.881423	472	0.5
STMN3	Gene	2	2	0	4	0.00306675	0.25	0	7	3	0.863636	52	0.5
LTF	Gene	1	0	1	4.01449	0	0.249097	0	6	2	0.862978	0	0
C1S	Gene	1	1	0	4.65217	0	0.214953	0	7	2	0.833992	0	0
DPP4	Gene	1	1	0	3.69565	0	0.270588	0	7	9	0.87747	0	0
SERPINB4	Gene	1	1	0	4.01449	0	0.249097	0	7	2	0.862978	0	0
LCN2	Gene	1	1	0	3.31884	0	0.30131	0	6	13	0.894598	0	0
CHI3L2	Gene	1	1	0	3.91304	0	0.255556	0	7	3	0.867589	0	0
SERPINA3	Gene	1	1	0	3.05797	0	0.327014	0	5	18	0.906456	0	0
SNTB1	Gene	1	1	0	4.05797	0	0.246429	0	7	2	0.861001	0	0
FABP7	Gene	1	0	1	4.75362	0	0.210366	0	8	2	0.829381	0	0
LCP1	Gene	1	0	1	3.82609	0	0.261364	0	6	6	0.871542	0	0
HAS3	Gene	1	0	1	3.05797	0	0.327014	0	5	18	0.906456	0	0
SPINK6	Gene	1	1	0	5.55072	0	0.180157	0	8	2	0.793149	0	0
LCE3A	Gene	1	0	1	4.50725	0	0.221865	0	7	7	0.84058	0	0
LCE1D	Gene	1	0	1	5.44928	0	0.183511	0	8	3	0.79776	0	0
CD1A	Gene	1	0	1	3.10145	0	0.32243	0	6	17	0.90448	0	0
CHP2	Gene	1	0	1	4.05797	0	0.246429	0	7	4	0.861001	0	0
IL37	Gene	1	0	1	3.05797	0	0.327014	0	6	22	0.906456	0	0
MSMB	Gene	1	1	0	3.36232	0	0.297414	0	6	10	0.892622	0	0

## Sheet: ST3
Table S3. Centrality parameters calculated for interactions in the (V)HE combined network through network analysis with Cytoscape.
Source node	Target node	FI Annotation	FI Score	EdgeBetweenness
NFKB1	SPRR2A	expression regulates	1	584.67
JUN	SPRR2A	expression regulates	1	513.33
SPRR2A	TGM1	complex; input	1	454.667
BIRC3	CASP7	PPrel: inhibition; activate; inhibite	1	402
LCE1A	SPRR2A	complex; input	1	330.667
CASP7	KLK13	predicted	0.63	272
DMD	JUN	expression regulated by	1	272
SERPINB3	STAT3	expression regulated by	1	272
C1R	NNMT	predicted	0.52	272
LYZ	NFKB1	predicted	0.64	272
ERBB2	TNS2	predicted	0.64	272
BIRC3	STAT3	expression regulated by	1	266.933
BIRC3	NFKB1	GErel: expression by; expression regulated by	1	261.067
NFKB1	RAC2	PPrel: activated by	1	225.12
NFKB1	STAT3	PPrel: activated by; reaction	1	216.104
JUN	STAT3	expression regulated by; reaction	1	212.612
PI3	SPRR2A	complex; input	1	206.667
BRCA1	RTEL1	catalyzed by	1	195.923
BCL3	LIME1	expression regulates	1	188.021
KRT16	NFKB1	expression regulated by	1	185.64
ERBB2	STAT3	complex; input	1	181.284
CHI3L1	STAT3	expression regulated by	1	174.813
NNMT	STAT3	expression regulated by	1	162.4
JUN	NNMT	expression regulates	1	160.343
JUN	KRT16	expression regulates	1	159.785
EP300	NFKB1	complex; input	1	153.207
SMARCD1	STMN3	predicted	0.64	144.056
EP300	JUN	complex; input; reaction	1	142.892
FOS	SMARCD1	predicted	0.64	139.649
CDH3	STAT3	expression regulated by	1	138.071
IL37	STAT3	activate	1	138
CHP2	SLC9A1	predicted	0.64	138
CD1A	JUN	GErel: expression by	1	138
LCE1D	LCE1E	predicted	0.64	138
LCE3A	TGM1	predicted	0.64	138
KLK13	SPINK6	complex; input	1	138
HAS3	NFKB1	expression regulated by	1	138
LCP1	RAC2	predicted	0.52	138
FABP7	TNS2	predicted	0.64	138
DMD	SNTB1	predicted	0.7	138
CHI3L1	CHI3L2	predicted	0.92	138
SERPINB3	SERPINB4	predicted	0.99	138
CXCR4	DPP4	predicted	0.64	138
EP300	LCN2	expression regulates	1	138
CREB1	MSMB	expression regulates	1	138
LCE1E	TGM1	predicted	0.64	138
C1R	C1S	complex	1	138
NFKB1	SERPINA3	predicted	0.64	138
LTF	LYZ	predicted	0.64	138
S100A8	STAT3	expression regulated by	1	137.587
LCE1A	LCE1E	predicted	0.64	134
JUN	MMP12	expression regulates	1	133.929
EP300	SMARCD1	complex; input; reaction	1	130.406
S100A9	STAT3	expression regulated by	1	121.294
EGFR	STAT3	activate; complex; input	1	119.376
EGFR	KRT17	predicted	0.64	117.697
EP300	SLC9A1	expression regulates	1	117.478
FOS	KRT6A	expression regulates	1	117.048
CREB1	NFKB1	expression regulated by; reaction	1	112.619
KRT16	KRT6C	complex; input	1	111.705
NFKB1	STAT1	expression regulates	1	110.958
STAT1	TYMP	expression regulates	1	110.481
CREB1	JUN	GErel: expression; complex; expression regulates; input	1	102.347
JUN	NFKB1	GErel: expression; PPrel: activated, indirect effect	1	100.381
EP300	STAT3	PPrel: activation; activate; catalyze; expression regulates	1	100.364
CXCR4	STAT3	activate; expression regulated by	1	99.0261
KRT16	KRT6B	complex; input	1	97.9619
CHI3L1	EP300	expression regulated by	1	97.1873
CREB1	SLC9A1	expression regulates	1	94.9134
ERBB2	STAT1	complex; input	1	91.8316
CREB1	ERBB2	expression regulates	1	88.7983
EP300	LAPTM5	expression regulates	1	88.3968
JUN	STAT1	expression regulated by	1	86.3298
BCL3	STAT3	expression regulated by	1	84.9113
PARP9	STAT3	expression regulated by	1	84.9
EGFR	S100A7	predicted	0.64	84.5802
FOS	STAT3	GErel: expression by; expression regulated by; reaction	1	83.5082
BCL3	NFKB1	PPrel: binding/association; complex; input	1	83.0976
BRCA1	NFKB1	predicted	0.64	81.9929
FOS	NFKB1	PPrel: activated, indirect effect; expression regulated by	1	80.2811
NNMT	STAT1	expression regulated by	1	79.2571
BRCA1	STAT3	expression regulates	1	75.1732
rs8114049	RTEL1	splicing regulates	1	72.5896
CREB1	STAT3	expression regulates; reaction	1	72.3446
FOS	JUN	PPrel: activated by; activated by; complex; expression regulated by; inhibited by; input; reaction	1	70.7676
FOS	KRT16	expression regulates	1	69.8302
EGFR	SLC9A1	activate	1	69.0422
BCL3	JUN	predicted	0.64	67.6976
BRCA1	JUN	expression regulated by	1	66.9929
NFKB1	TNC	expression regulates	1	64.9024
rs8114049	LIME1	expression regulates	1	64.6879
KRT16	KRT17	predicted	0.92	64.6074
EGFR	ERBB2	PPrel: binding/association; catalyze; catalyzed by; complex; inhibited by; input; reaction	1	60.9385
EGFR	FOS	predicted	0.64	60.1677
EGFR	STAT1	activate; complex; expression regulated by; input	1	59.6722
JUN	TNC	expression regulates	1	58.3579
CXCR4	RAC2	predicted	0.99	56.9335
CXCR4	FOS	expression regulated by	1	55.3784
CXCR4	STAT1	activate	1	55.288
PARP9	STAT1	expression regulated by	1	53.1
SPRR2D	TGM1	complex; input	1	48
SPRR2B	TGM1	complex; input	1	48
EP300	STAT1	PPrel: activation; complex; expression regulates; input	1	47.3341
LCE1A	SPRR2D	complex; input	1	46
LCE1A	SPRR2B	complex; input	1	46
RAC2	S100A9	complex; input; reaction	1	44.3476
EGFR	TNC	predicted	0.64	44.2937
PI3	SPRR2B	complex; input	1	44
PI3	SPRR2D	complex; input	1	44
CCL22	STAT3	expression regulated by	1	43.3481
CXCR4	EP300	expression regulated by	1	42.7341
CREB1	CXCR4	expression regulates	1	41.4276
CCL22	NFKB1	GErel: expression by	1	40.8608
CCL22	JUN	expression regulated by	1	38.2417
IL4R	STAT3	complex; expression regulated by; input	1	37.5968
BCL3	STAT1	predicted	0.64	36.8636
RAC2	S100A8	complex; input; reaction	1	36.3333
IL4R	NFKB1	GErel: expression by	1	35.8968
BCL3	FOS	predicted	0.64	35.4589
EGFR	S100A9	predicted	0.64	35.3857
EP300	FOS	complex; expression regulates; input; reaction	1	34.004
BRCA1	EP300	expression regulated by	1	33.9939
BRCA1	STAT1	expression regulated by	1	33.8922
CREB1	FOS	GErel: expression; expression regulates; reaction	1	33.2931
LAPTM5	RAC2	predicted	0.52	32.6341
FOS	STAT1	GErel: expression by; expression regulated by	1	31.8097
S100A7	S100A8	predicted	0.92	31.2135
STAT1	STAT3	PPrel: state change; complex; expression regulates; input	1	30.619
CXCR4	LAPTM5	predicted	0.52	30.4548
KRT16	KRT6A	complex; input	1	29.7381
IL4R	JUN	GErel: expression by	1	29.6746
CCL22	CXCR4	PPrel: activation, binding/association	1	29.2263
S100A7	S100A9	predicted	0.92	28.2111
CDH3	MMP12	catalyzed by	1	27.5381
ERBB2	TYMP	predicted	0.64	27.519
BRCA1	CREB1	expression regulated by	1	27.3273
KRT17	KRT6C	complex; input	1	26.2952
CREB1	EP300	PPrel: inhibition; complex; input; reaction	1	25.2143
KRT17	KRT6B	complex; input	1	24.2611
rs8114049	STMN3	splicing regulates	1	22.7225
FOS	IL4R	GErel: expression	1	18.0349
IL4R	STAT1	complex; input	1	16.7968
KRT6A	KRT6B	predicted	0.92	15.777
KRT17	KRT6A	complex; input	1	13.4095
BRCA1	CCL22	expression regulates	1	11.51
BCL3	CCL22	GErel: expression	1	10.6684
PI3	TGM1	complex; input	1	6
S100A8	S100A9	complex	1	5.00238
LCE1A	PI3	complex; input	1	4
LCE1A	TGM1	complex; input	1	4
FI: Functional Interaction; FI score: a score provided by ReactomeFI plugin for the reliability of the predicted interactions; Edge: interaction.

## Sheet: ST4
Table S4. Functional enrichment results of the 52 VHE DEGs (A) and the three HE QTLs (B) in Reactome pathways.
A)
ReactomePathway	NumberOfProteinInPathway	ProteinFromGeneSet	P-value	FDR	HitGenes
Metal sequestration by antimicrobial proteins	6	6	1.106e-13	1.194e-11	S100A7A,S100A9,S100A8,LTF,S100A7,LCN2
Keratinization	217	13	6.453e-13	3.484e-11	KRT6C,KRT6B,KRT6A,SPINK6,LCE1E,LCE1D,LCE3A,PI3,SPRR2A,SPRR2B,SPRR2D,KRT17,KRT16
Formation of the cornified envelope	75	8	3.41e-10	1.228e-08	SPINK6,LCE1E,LCE1D,LCE3A,PI3,SPRR2A,SPRR2B,SPRR2D
Antimicrobial peptides	95	8	2.143e-09	5.787e-08	S100A7A,S100A9,S100A8,LTF,S100A7,PI3,LYZ,LCN2
Innate Immune System	1145	14	3.619e-05	0.00076	SERPINA3,S100A7A,SERPINB3,S100A9,S100A8,BIRC3,LTF,S100A7,C1S,C1R,PI3,CCL22,LYZ,LCN2
Neutrophil degranulation	479	8	0.0003202	0.005764	SERPINA3,SERPINB3,S100A9,S100A8,LTF,S100A7,LYZ,LCN2
Regulation of TLR by endogenous ligand	18	2	0.002069	0.031	S100A9,S100A8
RHO GTPases Activate NADPH Oxidases	24	2	0.003626	0.047	S100A9,S100A8
B)
ReactomePathway	NumberOfProteinInPathway	ProteinFromGeneSet	P-value	FDR	HitGenes
Cytosolic iron-sulfur cluster assembly	13	1	0.001171	0.005948	RTEL1
Telomere Extension By Telomerase	23	1	0.002073	0.005948	RTEL1
Resolution of D-loop Structures through Synthesis-Dependent Strand Annealing (SDSA)	26	1	0.002343	0.005948	RTEL1
Resolution of D-Loop Structures	33	1	0.002974	0.005948	RTEL1
Extension of Telomeres	51	1	0.004596	0.005948	RTEL1
HDR through Homologous Recombination (HRR)	66	1	0.005948	0.005948	RTEL1
Telomere Maintenance	93	1	0.008381	0.008381	RTEL1
HDR through Homologous Recombination (HRR) or Single Strand Annealing (SSA)	114	1	0.01	0.01	RTEL1
Chromosome Maintenance	120	1	0.011	0.011	RTEL1
Homology Directed Repair	120	1	0.011	0.011	RTEL1
DNA Double-Strand Break Repair	149	1	0.013	0.013	RTEL1

## Sheet: ST5
Table S5. Functional enrichment of the combined (V)HE network, including 52 VHE genes, 3 HE genes, and 23 linker genes, in Reactome pathways.
ReactomePathway	NumberOfProteinInPathway	ProteinFromGeneSet	P-value	FDR	HitGenes
Keratinization	217	16	7.006e-14	2.83e-11	TGM1,LCE1A,KRT6C,KRT6B,KRT6A,SPINK6,LCE1E,LCE1D,LCE3A,PI3,SPRR2A,SPRR2B,SPRR2D,KLK13,KRT17,KRT16
Formation of the cornified envelope	75	11	5.993e-13	1.211e-10	TGM1,LCE1A,SPINK6,LCE1E,LCE1D,LCE3A,PI3,SPRR2A,SPRR2B,SPRR2D,KLK13
Metal sequestration by antimicrobial proteins	6	6	1.653e-12	2.215e-10	S100A7A,S100A9,S100A8,LTF,S100A7,LCN2
Antimicrobial peptides	95	8	7.349e-08	7.422e-06	S100A7A,S100A9,S100A8,LTF,S100A7,PI3,LYZ,LCN2
Innate Immune System	1145	21	7.014e-07	5.611e-05	SERPINA3,S100A7A,RAC2,EP300,SERPINB3,FOS,CREB1,CHI3L1,S100A9,S100A8,BIRC3,LTF,S100A7,C1S,C1R,PI3,JUN,CCL22,LYZ,NFKB1,LCN2
Toll Like Receptor 4 (TLR4) Cascade	132	7	1.041e-05	0.0006972	FOS,CREB1,S100A9,S100A8,BIRC3,JUN,NFKB1
Toll Like Receptor 2 (TLR2) Cascade	102	6	2.616e-05	0.001042	FOS,CREB1,S100A9,S100A8,JUN,NFKB1
MyD88:MAL(TIRAP) cascade initiated on plasma membrane	102	6	2.616e-05	0.001042	FOS,CREB1,S100A9,S100A8,JUN,NFKB1
Toll Like Receptor TLR6:TLR2 Cascade	102	6	2.616e-05	0.001042	FOS,CREB1,S100A9,S100A8,JUN,NFKB1
Toll Like Receptor TLR1:TLR2 Cascade	102	6	2.616e-05	0.001042	FOS,CREB1,S100A9,S100A8,JUN,NFKB1
Toll-like Receptor Cascades	155	7	2.894e-05	0.001042	FOS,CREB1,S100A9,S100A8,BIRC3,JUN,NFKB1
Interleukin-4 and Interleukin-13 signaling	112	6	4.388e-05	0.001399	IL4R,FOS,CCL22,STAT1,STAT3,LCN2
Signaling by Interleukins	453	11	4.514e-05	0.001399	IL4R,FOS,CREB1,LCP1,JUN,CCL22,IL37,STAT1,STAT3,NFKB1,LCN2
Signaling by NOTCH3	49	4	0.0001839	0.005044	EP300,EGFR,STAT1,FABP7
Toll Like Receptor 3 (TLR3) Cascade	93	5	0.000194	0.005044	FOS,CREB1,BIRC3,JUN,NFKB1
TRIF(TICAM1)-mediated TLR4 signaling	97	5	0.0002353	0.005413	FOS,CREB1,BIRC3,JUN,NFKB1
MyD88-independent TLR4 cascade	97	5	0.0002353	0.005413	FOS,CREB1,BIRC3,JUN,NFKB1
PLCG1 events in ERBB2 signaling	4	2	0.0002501	0.005501	EGFR,ERBB2
Neutrophil degranulation	479	10	0.0003512	0.006927	SERPINA3,SERPINB3,CHI3L1,S100A9,S100A8,LTF,S100A7,LYZ,NFKB1,LCN2
RHO GTPases Activate NADPH Oxidases	24	3	0.0003646	0.006927	RAC2,S100A9,S100A8
Estrogen-dependent nuclear events downstream of ESR-membrane signaling	24	3	0.0003646	0.006927	FOS,CREB1,EGFR
NOTCH3 Intracellular Domain Regulates Transcription	25	3	0.0004104	0.007387	EP300,STAT1,FABP7
MAP kinase activation	63	4	0.0004738	0.008054	FOS,CREB1,JUN,NFKB1
Cytokine Signaling in Immune system	712	12	0.0005973	0.009557	IL4R,FOS,CREB1,LCP1,BIRC3,JUN,CCL22,IL37,STAT1,STAT3,NFKB1,LCN2
Interleukin-17 signaling	71	4	0.0007389	0.011	FOS,CREB1,JUN,NFKB1
MAPK targets/ Nuclear events mediated by MAP kinases	31	3	0.0007638	0.011	FOS,CREB1,JUN
Transcriptional regulation by the AP-2 (TFAP2) family of transcription factors	36	3	0.001172	0.016	EP300,EGFR,ERBB2
Interleukin-9 signaling	9	2	0.001243	0.016	STAT1,STAT3
Senescence-Associated Secretory Phenotype (SASP)	82	4	0.001255	0.016	FOS,JUN,STAT3,NFKB1
Toll Like Receptor 10 (TLR10) Cascade	85	4	0.001431	0.016	FOS,CREB1,JUN,NFKB1
MyD88 cascade initiated on plasma membrane	85	4	0.001431	0.016	FOS,CREB1,JUN,NFKB1
Toll Like Receptor 5 (TLR5) Cascade	85	4	0.001431	0.016	FOS,CREB1,JUN,NFKB1
Signaling by NOTCH	217	6	0.001465	0.016	EP300,CREB1,EGFR,JUN,STAT1,FABP7
STAT3 nuclear events downstream of ALK signaling	10	2	0.001529	0.016	EP300,STAT3
Interleukin-21 signaling	10	2	0.001529	0.016	STAT1,STAT3
Activation of the AP-1 family of transcription factors	10	2	0.001529	0.016	FOS,JUN
NGF-stimulated transcription	40	3	0.001582	0.016	EP300,FOS,CREB1
TRAF6 mediated induction of NFkB and MAP kinases upon TLR7/8 or 9 activation	89	4	0.001691	0.017	FOS,CREB1,JUN,NFKB1
MyD88 dependent cascade initiated on endosome	90	4	0.001761	0.017	FOS,CREB1,JUN,NFKB1
Toll Like Receptor 7/8 (TLR7/8) Cascade	91	4	0.001833	0.017	FOS,CREB1,JUN,NFKB1
Interleukin-6 signaling	11	2	0.001843	0.017	STAT1,STAT3
Interleukin-27 signaling	11	2	0.001843	0.017	STAT1,STAT3
Toll Like Receptor 9 (TLR9) Cascade	94	4	0.00206	0.017	FOS,CREB1,JUN,NFKB1
Interleukin-35 Signalling	12	2	0.002186	0.017	STAT1,STAT3
NOTCH2 intracellular domain regulates transcription	12	2	0.002186	0.017	EP300,CREB1
TFAP2 (AP-2) family regulates transcription of growth factors and their receptors	13	2	0.002556	0.02	EGFR,ERBB2
ERBB2 Activates PTK6 Signaling	13	2	0.002556	0.02	EGFR,ERBB2
ERBB2 Regulates Cell Motility	15	2	0.003378	0.027	EGFR,ERBB2
GRB2 events in ERBB2 signaling	16	2	0.00383	0.027	EGFR,ERBB2
PI3K events in ERBB2 signaling	16	2	0.00383	0.027	EGFR,ERBB2
Signaling by Non-Receptor Tyrosine Kinases	55	3	0.003873	0.027	EGFR,ERBB2,STAT3
Signaling by PTK6	55	3	0.003873	0.027	EGFR,ERBB2,STAT3
Interleukin-12 family signaling	57	3	0.004277	0.029	LCP1,STAT1,STAT3
Hyaluronan metabolism	17	2	0.004307	0.029	SLC9A1,HAS3
Signaling by NTRK1 (TRKA)	116	4	0.004356	0.029	EP300,FOS,CREB1,STAT3
Transcriptional regulation of granulopoiesis	59	3	0.004705	0.029	EP300,CREB1,STAT3
ESR-mediated signaling	192	5	0.004744	0.029	EP300,FOS,CREB1,EGFR,JUN
Gastrin-CREB signalling pathway via PKC and MAPK	18	2	0.004812	0.029	CREB1,EGFR
Regulation of TLR by endogenous ligand	18	2	0.004812	0.029	S100A9,S100A8
Nicotinamide salvaging	19	2	0.005342	0.032	PARP9,NNMT
Nuclear Events (kinase and transcription factor activation)	62	3	0.005395	0.032	EP300,FOS,CREB1
TP53 Regulates Transcription of DNA Repair Genes	65	3	0.006142	0.037	BRCA1,FOS,JUN
CD209 (DC-SIGN) signaling	21	2	0.006478	0.039	EP300,NFKB1
Interleukin-37 signaling	21	2	0.006478	0.039	IL37,STAT3
SHC1 events in ERBB2 signaling	22	2	0.007084	0.042	EGFR,ERBB2
Signaling by NTRKs	135	4	0.00738	0.042	EP300,FOS,CREB1,STAT3
Growth hormone receptor signaling	24	2	0.008369	0.042	STAT1,STAT3
Interleukin-6 family signaling	24	2	0.008369	0.042	STAT1,STAT3
Extra-nuclear estrogen signaling	74	3	0.008743	0.044	FOS,CREB1,EGFR
Inactivation of CSF3 (G-CSF) signaling	25	2	0.009049	0.045	STAT1,STAT3
Interleukin-20 family signaling	26	2	0.009751	0.049	STAT1,STAT3
Resolution of D-loop Structures through Synthesis-Dependent Strand Annealing (SDSA)	26	2	0.009751	0.049	BRCA1,RTEL1

## Sheet: ST6
Table S6. Functional enrichment results of the 11 identified modules within the combined (V)HE network.
# Module	Description	No. genes	No. genes in module	Genes	P-value	FDR
1	Glucocorticoid receptor regulatory network	78	6	JUN,STAT1,FOS,NFKB1,CREB1,EP300	2.882e-09	1.144e-06
1	Hepatitis B	162	7	JUN,STAT1,STAT3,FOS,NFKB1,CREB1,EP300	5.846e-09	1.158e-06
1	Th17 cell differentiation	107	6	JUN,IL4R,STAT1,STAT3,FOS,NFKB1	1.865e-08	1.829e-06
1	Kaposi sarcoma-associated herpesvirus infection	193	7	JUN,STAT1,STAT3,FOS,NFKB1,CREB1,EP300	1.933e-08	1.829e-06
1	Interleukin-4 and Interleukin-13 signaling	111	6	IL4R,CCL22,STAT1,STAT3,FOS,LCN2	2.315e-08	1.829e-06
1	ATF-2 transcription factor network	58	5	JUN,BRCA1,FOS,CREB1,EP300	4.061e-08	2.68e-06
1	Inflammatory bowel disease	65	5	JUN,IL4R,STAT1,STAT3,NFKB1	7.125e-08	3.764e-06
1	HIF-1-alpha transcription factor network	66	5	JUN,CXCR4,FOS,CREB1,EP300	7.683e-08	3.764e-06
1	tpo signaling pathway	25	4	JUN,STAT1,STAT3,FOS	9.277e-08	4.082e-06
1	pdgf signaling pathway	26	4	JUN,STAT1,STAT3,FOS	1.084e-07	4.228e-06
1	PD-L1 expression and PD-1 checkpoint pathway in cancer	89	5	JUN,STAT1,STAT3,FOS,NFKB1	3.343e-07	1.142e-05
1	pertussis toxin-insensitive ccr5 signaling in macrophage	8	3	JUN,CXCR4,FOS	3.459e-07	1.142e-05
1	Th1 and Th2 cell differentiation	92	5	JUN,IL4R,STAT1,FOS,NFKB1	3.934e-07	1.18e-05
1	ErbB1 downstream signaling	100	5	JUN,STAT1,STAT3,FOS,CREB1	5.918e-07	1.657e-05
1	C-type lectin receptor signaling pathway	104	5	JUN,CCL22,STAT1,NFKB1,BCL3	7.17e-07	1.864e-05
1	FOXA1 transcription factor network	44	4	JUN,BRCA1,FOS,EP300	8.72e-07	2.093e-05
1	TNF signaling pathway	112	5	JUN,FOS,NFKB1,CREB1,BCL3	1.03e-06	2.369e-05
1	IL6-mediated signaling events	47	4	JUN,STAT1,STAT3,FOS	1.132e-06	2.485e-05
1	Pathways in cancer	531	8	JUN,IL4R,STAT1,STAT3,CXCR4,FOS,NFKB1,EP300	1.243e-06	2.485e-05
1	Growth hormone synthesis, secretion and action	119	5	STAT1,STAT3,FOS,CREB1,EP300	1.384e-06	2.63e-05
1	Senescence-Associated Secretory Phenotype (SASP)	54	4	JUN,STAT3,FOS,NFKB1	1.957e-06	3.356e-05
1	IL2-mediated signaling events	54	4	JUN,STAT1,STAT3,FOS	1.957e-06	3.356e-05
1	Osteoclast differentiation	128	5	JUN,STAT1,FOS,NFKB1,CREB1	1.974e-06	3.356e-05
1	Measles	139	5	JUN,STAT1,STAT3,FOS,NFKB1	2.947e-06	4.715e-05
1	IL12-mediated signaling events	62	4	STAT1,STAT3,FOS,NFKB1	3.372e-06	5.058e-05
1	Angiogenesis	66	4	JUN,STAT1,STAT3,FOS	4.311e-06	6.403e-05
1	Interleukin-17 signaling	67	4	JUN,FOS,NFKB1,CREB1	4.573e-06	6.403e-05
1	AP-1 transcription factor network	70	4	JUN,FOS,CREB1,EP300	5.432e-06	7.061e-05
1	Prolactin signaling pathway	70	4	STAT1,STAT3,FOS,NFKB1	5.432e-06	7.061e-05
1	inhibition of cellular proliferation by gleevec	22	3	JUN,STAT1,FOS	7.087e-06	9.213e-05
1	Leishmaniasis	77	4	JUN,STAT1,FOS,NFKB1	7.893e-06	9.471e-05
1	Regulation of nuclear SMAD2/3 signaling	77	4	JUN,FOS,CREB1,EP300	7.893e-06	9.471e-05
1	Chemokine signaling pathway	192	5	CCL22,STAT1,STAT3,CXCR4,NFKB1	1.401e-05	0.0001681
1	Osteopontin-mediated events	29	3	JUN,FOS,NFKB1	1.611e-05	0.0001772
1	IL-17 signaling pathway	94	4	JUN,FOS,NFKB1,LCN2	1.721e-05	0.0001893
1	Viral carcinogenesis	204	5	JUN,STAT3,NFKB1,CREB1,EP300	1.873e-05	0.000206
1	Transcriptional regulation of granulopoiesis	32	3	STAT3,CREB1,EP300	2.158e-05	0.0002158
1	IL12 signaling mediated by STAT4	32	3	JUN,STAT3,FOS	2.158e-05	0.0002158
1	AGE-RAGE signaling pathway in diabetic complications	100	4	JUN,STAT1,STAT3,NFKB1	2.19e-05	0.000219
1	cAMP signaling pathway	216	5	JUN,FOS,NFKB1,CREB1,EP300	2.461e-05	0.0002215
1	Toll-like receptor signaling pathway	104	4	JUN,STAT1,FOS,NFKB1	2.551e-05	0.0002296
1	Human T-cell leukemia virus 1 infection	219	5	JUN,FOS,NFKB1,CREB1,EP300	2.628e-05	0.0002365
1	Signaling by NTRK1 (TRKA)	107	4	STAT3,FOS,CREB1,EP300	2.849e-05	0.0002564
1	IL23-mediated signaling events	37	3	STAT1,STAT3,NFKB1	3.317e-05	0.0002654
1	GMCSF-mediated signaling events	37	3	STAT1,STAT3,FOS	3.317e-05	0.0002654
1	ErbB2/ErbB3 signaling events	37	3	JUN,STAT3,FOS	3.317e-05	0.0002654
1	Coronavirus disease - COVID-19	232	5	JUN,STAT1,STAT3,FOS,NFKB1	3.458e-05	0.0002767
1	PDGFR-beta signaling pathway	120	4	JUN,STAT1,STAT3,FOS	4.444e-05	0.0003555
1	Relaxin signaling pathway	129	4	JUN,FOS,NFKB1,CREB1	5.878e-05	0.0004702
1	FGF signaling pathway	47	3	JUN,STAT1,FOS	6.727e-05	0.0004709
1	ESR-mediated signaling	137	4	JUN,FOS,CREB1,EP300	7.412e-05	0.0005189
1	Cocaine addiction	49	3	JUN,NFKB1,CREB1	7.606e-05	0.0005324
1	tsp-1 induced apoptosis in microvascular endothelial cell	8	2	JUN,FOS	8.559e-05	0.0005992
1	Toll-like Receptor Cascades	143	4	JUN,FOS,NFKB1,CREB1	8.742e-05	0.0006119
1	mapkinase signaling pathway	53	3	JUN,STAT1,FOS	9.584e-05	0.0006709
1	Signaling events mediated by HDAC Class I	56	3	STAT3,NFKB1,EP300	0.0001127	0.0007888
1	il22 soluble receptor signaling pathway	10	2	STAT1,STAT3	0.0001335	0.0008008
1	Validated targets of C-MYC transcriptional repression	60	3	BRCA1,CREB1,EP300	0.000138	0.0008281
1	JAK-STAT signaling pathway	162	4	IL4R,STAT1,STAT3,EP300	0.0001411	0.0008463
1	Fc-epsilon receptor I signaling in mast cells	62	3	JUN,FOS,NFKB1	0.000152	0.0009117
1	LPA receptor mediated events	63	3	JUN,FOS,NFKB1	0.0001593	0.0009555
1	Ras Pathway	63	3	JUN,STAT1,STAT3	0.0001593	0.0009555
1	Validated nuclear estrogen receptor alpha network	64	3	JUN,BRCA1,EP300	0.0001668	0.001001
1	BCR signaling pathway	65	3	JUN,FOS,NFKB1	0.0001745	0.001039
1	repression of pain sensation by the transcriptional regulator dream	12	2	JUN,FOS	0.0001918	0.001039
1	Regulation of Telomerase	68	3	JUN,FOS,NFKB1	0.0001992	0.001039
1	Amphetamine addiction	69	3	JUN,FOS,CREB1	0.0002079	0.001039
1	Tuberculosis	180	4	STAT1,NFKB1,CREB1,EP300	0.0002108	0.001054
1	cadmium induces dna synthesis and proliferation in macrophages	13	2	JUN,FOS	0.0002249	0.001124
1	oxidative stress induced gene expression via nrf2	13	2	JUN,FOS	0.0002249	0.001124
1	Atypical NF-kappaB pathway	14	2	NFKB1,BCL3	0.0002606	0.001303
1	Pertussis	76	3	JUN,FOS,NFKB1	0.0002757	0.001376
1	Pancreatic cancer	76	3	STAT1,STAT3,NFKB1	0.0002757	0.001376
1	calcium signaling by hbx of hepatitis b virus	15	2	JUN,FOS	0.0002988	0.001376
1	atm signaling pathway	15	2	JUN,BRCA1	0.0002988	0.001376
1	Epstein-Barr virus infection	202	4	JUN,STAT1,STAT3,NFKB1	0.0003265	0.001376
1	T cell activation	81	3	JUN,FOS,NFKB1	0.000332	0.001376
1	CXCR4-mediated signaling events	81	3	STAT1,STAT3,CXCR4	0.000332	0.001376
1	nerve growth factor pathway (ngf)	16	2	JUN,FOS	0.0003396	0.001376
1	B cell receptor signaling pathway	82	3	JUN,FOS,NFKB1	0.0003441	0.001376
1	Human immunodeficiency virus 1 infection	212	4	JUN,CXCR4,FOS,NFKB1	0.0003919	0.001568
1	mets affect on macrophage differentiation	18	2	JUN,FOS	0.000429	0.001716
1	Human cytomegalovirus infection	225	4	STAT3,CXCR4,NFKB1,CREB1	0.0004903	0.001961
1	RNA Polymerase II Transcription	913	7	JUN,STAT1,BRCA1,FOS,NFKB1,CREB1,EP300	0.0005022	0.002009
1	Prostate cancer	97	3	NFKB1,CREB1,EP300	0.0005604	0.002242
1	egf signaling pathway	21	2	STAT1,STAT3	0.0005821	0.002328
1	Interleukin-20 family signaling	21	2	STAT1,STAT3	0.0005821	0.002328
1	igf-1 signaling pathway	21	2	JUN,FOS	0.0005821	0.002328
1	PDGFR-alpha signaling pathway	21	2	JUN,FOS	0.0005821	0.002328
1	Viral protein interaction with cytokine and cytokine receptor	100	3	CCL22,IL37,CXCR4	0.0006121	0.002448
1	Chagas disease	102	3	JUN,FOS,NFKB1	0.0006482	0.002593
1	T cell receptor signaling pathway	104	3	JUN,FOS,NFKB1	0.0006856	0.002663
1	Interleukin-6 family signaling	23	2	STAT1,STAT3	0.0006969	0.002663
1	Growth hormone receptor signaling	24	2	STAT1,STAT3	0.000758	0.002663
1	Insulin resistance	108	3	STAT3,NFKB1,CREB1	0.0007645	0.002663
1	HIF-1 signaling pathway	109	3	STAT3,NFKB1,EP300	0.000785	0.002663
1	Nongenotropic Androgen signaling	25	2	FOS,CREB1	0.0008217	0.002663
1	fc epsilon receptor i signaling in mast cells	25	2	JUN,FOS	0.0008217	0.002663
1	Toxoplasmosis	112	3	STAT1,STAT3,NFKB1	0.0008489	0.002663
1	S1P2 pathway	26	2	JUN,FOS	0.0008878	0.002663
1	bcr signaling pathway	26	2	JUN,FOS	0.0008878	0.002663
1	bioactive peptide induced signaling pathway	26	2	STAT1,STAT3	0.0008878	0.002663
1	IL27-mediated signaling events	26	2	STAT1,STAT3	0.0008878	0.002663
1	Calcium signaling in the CD4+ TCR pathway	27	2	JUN,FOS	0.0009565	0.002869
1	Signaling by ALK	27	2	STAT3,EP300	0.0009565	0.002869
1	Huntington disease	121	3	JUN,FOS,EP300	0.00106	0.003181
1	EGF receptor (ErbB1) signaling pathway	29	2	STAT1,STAT3	0.001101	0.003304
1	Signaling by NOTCH2	29	2	CREB1,EP300	0.001101	0.003304
1	CD40/CD40L signaling	29	2	JUN,NFKB1	0.001101	0.003304
1	Signaling by CSF3 (G-CSF)	30	2	STAT1,STAT3	0.001177	0.003532
1	role of egf receptor transactivation by gpcrs in cardiac hypertrophy	31	2	JUN,FOS	0.001256	0.003767
1	toll-like receptor pathway	32	2	JUN,FOS	0.001337	0.00401
1	Cytokine-cytokine receptor interaction	295	4	IL4R,CCL22,IL37,CXCR4	0.001343	0.004028
1	Trk receptor signaling mediated by the MAPK pathway	33	2	FOS,CREB1	0.00142	0.004144
1	angiotensin ii mediated activation of jnk pathway via pyk2 dependent signaling	33	2	JUN,FOS	0.00142	0.004144
1	EPO signaling pathway	33	2	STAT1,NFKB1	0.00142	0.004144
1	Apoptosis	136	3	JUN,FOS,NFKB1	0.001481	0.004144
1	IL1-mediated signaling events	34	2	JUN,NFKB1	0.001506	0.004144
1	Yersinia infection	137	3	JUN,FOS,NFKB1	0.001513	0.004144
1	Estrogen signaling pathway	138	3	JUN,FOS,CREB1	0.001544	0.004144
1	Interleukin-1 family signaling	139	3	IL37,STAT3,NFKB1	0.001576	0.004144
1	Fluid shear stress and atherosclerosis	139	3	JUN,FOS,NFKB1	0.001576	0.004144
1	signal transduction through il1r	35	2	JUN,FOS	0.001594	0.004144
1	Signaling events mediated by TCPTP	35	2	STAT1,STAT3	0.001594	0.004144
1	Signaling mediated by p38-alpha and p38-beta	35	2	JUN,CREB1	0.001594	0.004144
1	MicroRNAs in cancer	310	4	STAT3,BRCA1,NFKB1,EP300	0.001611	0.004144
1	Validated transcriptional targets of AP1 family members Fra1 and Fra2	37	2	JUN,EP300	0.001778	0.004144
1	Breast cancer	147	3	JUN,BRCA1,FOS	0.001849	0.004144
1	Non-alcoholic fatty liver disease	150	3	JUN,FOS,NFKB1	0.001958	0.004144
1	Signaling events regulated by Ret tyrosine kinase	39	2	JUN,CREB1	0.001972	0.004144
1	Human papillomavirus infection	331	4	STAT1,NFKB1,CREB1,EP300	0.002047	0.004144
1	IFN-gamma pathway	40	2	STAT1,EP300	0.002072	0.004144
1	Oxidative stress response	40	2	JUN,STAT1	0.002072	0.004144
1	FOXM1 transcription factor network	40	2	FOS,EP300	0.002072	0.004144
1	Interleukin-2 family signaling	40	2	STAT1,STAT3	0.002072	0.004144
1	Signaling by SCF-KIT	41	2	STAT1,STAT3	0.002175	0.004349
1	Hepatitis C	157	3	STAT1,STAT3,NFKB1	0.002228	0.004456
1	Heme signaling	43	2	CREB1,EP300	0.002387	0.004774
1	Signaling by NOTCH3	44	2	STAT1,EP300	0.002497	0.004994
1	Interleukin-10 signaling	45	2	CCL22,STAT3	0.002609	0.005218
1	RhoA signaling pathway	45	2	JUN,FOS	0.002609	0.005218
1	Integrin-linked kinase signaling	45	2	JUN,CREB1	0.002609	0.005218
1	Presenilin action in Notch and Wnt signaling	45	2	JUN,FOS	0.002609	0.005218
1	PI3K-Akt signaling pathway	354	4	IL4R,BRCA1,NFKB1,CREB1	0.002612	0.005223
1	TNF receptor signaling pathway	46	2	STAT1,NFKB1	0.002724	0.005447
1	Pre-NOTCH Expression and Processing	46	2	JUN,EP300	0.002724	0.005447
1	Influenza A	171	3	STAT1,NFKB1,EP300	0.002836	0.005672
1	Calcineurin-regulated NFAT-dependent transcription in lymphocytes	47	2	JUN,FOS	0.00284	0.005681
1	Notch-mediated HES/HEY network	47	2	STAT3,EP300	0.00284	0.005681
1	keratinocyte differentiation	47	2	JUN,FOS	0.00284	0.005681
1	t cell receptor signaling pathway	49	2	JUN,FOS	0.003081	0.006162
1	NOD-like receptor signaling pathway	181	3	JUN,STAT1,NFKB1	0.003327	0.006655
1	Signaling by PDGF	51	2	STAT1,STAT3	0.003331	0.006662
1	Regulation of Androgen receptor activity	51	2	JUN,EP300	0.003331	0.006662
1	Signaling events mediated by Stem cell factor receptor (c-Kit)	52	2	STAT1,STAT3	0.003459	0.006919
1	RAC1 signaling pathway	54	2	JUN,STAT3	0.003723	0.007446
1	Interleukin signaling pathway	55	2	IL4R,FOS	0.003858	0.007717
1	Interleukin-12 family signaling	55	2	STAT1,STAT3	0.003858	0.007717
1	Pathogenic Escherichia coli infection	197	3	JUN,FOS,NFKB1	0.004217	0.008434
1	B cell activation	59	2	JUN,FOS	0.004422	0.008844
1	Endothelins	62	2	JUN,FOS	0.004869	0.009737
1	Fc epsilon receptor (FCERI) signaling	210	3	JUN,FOS,NFKB1	0.005037	0.01
1	hiv-1 defeats host-mediated resistance by cem15	3	1	CXCR4	0.005042	0.01
1	Regulation of retinoblastoma protein	64	2	JUN,EP300	0.005177	0.01
1	Cytosolic sensors of pathogen-associated DNA	64	2	NFKB1,EP300	0.005177	0.01
1	Downstream signaling in na&#xef;ve CD8+ T cells	65	2	JUN,FOS	0.005335	0.011
1	Oxidative Stress Induced Senescence	66	2	JUN,FOS	0.005495	0.011
1	Activation of anterior HOX genes in hindbrain development during early embryogenesis	66	2	JUN,EP300	0.005495	0.011
1	Circadian Clock	67	2	CREB1,EP300	0.005657	0.011
1	Acute myeloid leukemia	67	2	STAT3,NFKB1	0.005657	0.011
1	E2F transcription factor network	69	2	BRCA1,EP300	0.005988	0.012
1	Renal cell carcinoma	69	2	JUN,EP300	0.005988	0.012
1	Adipocytokine signaling pathway	69	2	STAT3,NFKB1	0.005988	0.012
1	Epithelial cell signaling in Helicobacter pylori infection	70	2	JUN,NFKB1	0.006156	0.012
1	ifn gamma signaling pathway	4	1	STAT1	0.006718	0.013
1	p73 transcription factor network	77	2	IL4R,EP300	0.007397	0.013
1	DDX58/IFIH1-mediated induction of interferon-alpha/beta	78	2	NFKB1,EP300	0.007582	0.013
1	Regulation of nuclear beta catenin signaling and target gene transcription	79	2	JUN,EP300	0.00777	0.013
1	TGF-beta signaling pathway	80	2	JUN,EP300	0.00796	0.013
1	Metabolism of water-soluble vitamins and cofactors	80	2	NNMT,PARP9	0.00796	0.013
1	Salmonella infection	249	3	JUN,FOS,NFKB1	0.008054	0.013
1	EGF receptor signaling pathway	82	2	STAT1,STAT3	0.008346	0.013
1	Transcriptional regulation of white adipocyte differentiation	84	2	NFKB1,EP300	0.008741	0.013
1	Colorectal cancer	86	2	JUN,FOS	0.009144	0.013
1	Longevity regulating pathway	89	2	NFKB1,CREB1	0.009763	0.013
1	stat3 signaling pathway	6	1	STAT3	0.01	0.013
1	Transcription regulation by bZIP transcription factor	6	1	CREB1	0.01	0.013
1	Alternative NF-kappaB pathway	6	1	NFKB1	0.01	0.013
1	d4gdi signaling pathway	6	1	JUN	0.01	0.013
1	Rheumatoid arthritis	93	2	JUN,FOS	0.011	0.013
1	Endocrine resistance	97	2	JUN,FOS	0.012	0.013
1	Circadian entrainment	97	2	FOS,CREB1	0.012	0.013
1	Choline metabolism in cancer	98	2	JUN,FOS	0.012	0.013
1	Hematopoietic cell lineage	99	2	IL4R,CD1A	0.012	0.013
1	Melanogenesis	101	2	CREB1,EP300	0.012	0.013
1	MAPK signaling pathway	294	3	JUN,FOS,NFKB1	0.013	0.013
1	Amoebiasis	102	2	CD1A,NFKB1	0.013	0.013
1	ifn alpha signaling pathway	8	1	STAT1	0.013	0.013
1	brca1 dependent ub ligase activity	8	1	BRCA1	0.013	0.013
1	Parathyroid hormone synthesis, secretion and action	106	2	FOS,CREB1	0.014	0.014
1	Glucagon signaling pathway	107	2	CREB1,EP300	0.014	0.014
1	Cholinergic synapse	113	2	FOS,CREB1	0.015	0.015
1	cxcr4 signaling pathway	10	1	CXCR4	0.017	0.017
1	Neurotrophin signaling pathway	119	2	JUN,NFKB1	0.017	0.017
1	Thyroid hormone signaling pathway	121	2	STAT1,EP300	0.017	0.017
1	Signaling by Leptin	11	1	STAT3	0.018	0.018
1	erythropoietin mediated neuroprotection through nf-kb	12	1	JUN	0.02	0.02
1	FoxO signaling pathway	131	2	STAT3,EP300	0.02	0.02
1	Dopaminergic synapse	132	2	FOS,CREB1	0.021	0.021
1	il 6 signaling pathway	13	1	STAT3	0.022	0.022
1	il 3 signaling pathway	13	1	FOS	0.022	0.022
1	il12 and stat4 dependent signaling pathway in th1 development	13	1	JUN	0.022	0.022
1	Direct p53 effectors	138	2	JUN,EP300	0.022	0.022
1	C-type lectin receptors (CLRs)	139	2	NFKB1,EP300	0.023	0.023
1	il 4 signaling pathway	14	1	IL4R	0.023	0.023
1	the 41bb-dependent immune response	14	1	JUN	0.023	0.023
1	JNK signaling in the CD4+ TCR pathway	14	1	JUN	0.023	0.023
1	Ras signaling in the CD4+ TCR pathway	14	1	FOS	0.023	0.023
1	Interferon-gamma signaling pathway	15	1	STAT1	0.025	0.025
1	Heterotrimeric G-protein signaling pathway-Gi alpha and Gs alpha mediated pathway	147	2	CREB1,EP300	0.025	0.025
1	bone remodeling	16	1	FOS	0.027	0.027
1	LPA4-mediated signaling events	16	1	CREB1	0.027	0.027
1	Oxytocin signaling pathway	154	2	JUN,FOS	0.027	0.027
1	hypoxia-inducible factor in the cardivascular system	17	1	JUN	0.028	0.028
1	cell cycle: g2/m checkpoint	17	1	BRCA1	0.028	0.028
1	Necroptosis	159	2	STAT1,STAT3	0.029	0.029
1	Wnt signaling pathway	160	2	JUN,EP300	0.029	0.029
1	Neutrophil degranulation	408	3	SERPINA3,NFKB1,LCN2	0.03	0.03
1	Tight junction	169	2	JUN,CD1A	0.032	0.032
1	tnf/stress related signaling	20	1	JUN	0.033	0.033
1	role of brca1 brca2 and atr in cancer susceptibility	20	1	BRCA1	0.033	0.033
1	SUMOylation	175	2	BRCA1,EP300	0.035	0.035
1	erk1/erk2 mapk signaling pathway	21	1	STAT3	0.035	0.035
1	nf-kb signaling pathway	21	1	NFKB1	0.035	0.035
1	p38 signaling mediated by MAPKAP kinases	21	1	CREB1	0.035	0.035
1	Interleukin-7 signaling	22	1	STAT3	0.036	0.036
1	links between pyk2 and map kinases	23	1	JUN	0.038	0.038
1	Canonical NF-kappaB pathway	23	1	NFKB1	0.038	0.038
1	Incretin synthesis, secretion, and inactivation	23	1	DPP4	0.038	0.038
1	Transcriptional regulation of pluripotent stem cells	24	1	STAT3	0.04	0.04
1	p53 pathway feedback loops 2	24	1	STAT1	0.04	0.04
1	VEGFR3 signaling in lymphatic endothelium	25	1	CREB1	0.041	0.041
1	S1P3 pathway	25	1	CXCR4	0.041	0.041
1	Nephrin/Neph1 signaling in the kidney podocyte	25	1	JUN	0.041	0.041
1	activation of camp-dependent protein kinase pka	26	1	CXCR4	0.043	0.043
1	ß-arrestins in gpcr desensitization	26	1	CXCR4	0.043	0.043
1	Signaling events mediated by HDAC Class III	26	1	EP300	0.043	0.043
1	Chromatin organization	202	2	NFKB1,EP300	0.045	0.045
1	role of ß-arrestins in the activation and targeting of map kinases	28	1	CXCR4	0.046	0.046
1	role of erbb2 in signal transduction and oncology	28	1	STAT3	0.046	0.046
1	BARD1 signaling events	29	1	BRCA1	0.048	0.048
1	Retinoic acid receptors-mediated signaling	30	1	EP300	0.049	0.049
1	the information processing pathway at the ifn beta enhancer	30	1	JUN	0.049	0.049
2	RHO GTPases Activate NADPH Oxidases	24	3	RAC2,S100A9,S100A8	6.879e-07	9.561e-05
2	Antimicrobial peptides	45	3	S100A9,S100A8,S100A7	4.498e-06	0.0003104
2	IL-17 signaling pathway	94	3	S100A9,S100A8,S100A7	4.024e-05	0.001851
2	Endogenous TLR signaling	25	2	S100A9,S100A8	0.0001581	0.005375
2	Focal adhesion	201	3	TNC,RAC2,EGFR	0.0003777	0.01
2	Regulation of actin cytoskeleton	218	3	RAC2,EGFR,SLC9A1	0.0004788	0.011
2	Adherens junction	71	2	RAC2,EGFR	0.001252	0.024
2	Pancreatic cancer	76	2	RAC2,EGFR	0.001432	0.024
2	EGF receptor signaling pathway	82	2	RAC2,EGFR	0.001663	0.024
2	Colorectal cancer	86	2	RAC2,EGFR	0.001827	0.024
2	Choline metabolism in cancer	98	2	RAC2,EGFR	0.002361	0.027
2	ErbB1 downstream signaling	100	2	EGFR,SLC9A1	0.002456	0.027
2	Neutrophil degranulation	408	3	S100A9,S100A8,S100A7	0.002918	0.029
2	neuroregulin receptor degredation protein-1 controls erbb3 receptor recycling	6	1	EGFR	0.00454	0.041
2	Toll-like Receptor Cascades	143	2	S100A9,S100A8	0.004938	0.042
2	cbl mediated ligand-induced downregulation of egf receptors pathway	7	1	EGFR	0.005295	0.042
3	Keratinization	112	6	LCE1A,TGM1,PI3,SPRR2A,SPRR2B,SPRR2D	7.053e-13	1.411e-12
3	Antimicrobial peptides	45	1	PI3	0.023	0.023
4	Cytosolic iron-sulfur cluster assembly	13	1	RTEL1	0.002189	0.014
4	Telomere Maintenance	66	1	RTEL1	0.011	0.014
4	Glucocorticoid receptor regulatory network	78	1	SMARCD1	0.013	0.014
4	HDR through Homologous Recombination (HRR) or Single Strand Annealing (SSA)	85	1	RTEL1	0.014	0.014
4	Hepatocellular carcinoma	168	1	SMARCD1	0.028	0.028
4	Thermogenesis	231	1	SMARCD1	0.039	0.039
4	Wnt signaling pathway	272	1	SMARCD1	0.045	0.045
5	Keratinization	112	5	KRT17,KRT16,KRT6C,KRT6B,KRT6A	7.476e-11	2.99e-10
5	Staphylococcus aureus infection	96	2	KRT17,KRT16	0.0006435	0.001287
5	Estrogen signaling pathway	138	2	KRT17,KRT16	0.00132	0.00132
5	Glucocorticoid receptor regulatory network	78	1	KRT17	0.032	0.032
6	Amoebiasis	102	2	SERPINB3,SERPINB4	0.0002202	0.001982
6	Striated Muscle Contraction	31	1	DMD	0.007814	0.019
6	agrin in postsynaptic differentiation	45	1	DMD	0.011	0.019
6	Viral myocarditis	60	1	DMD	0.015	0.019
6	Arrhythmogenic right ventricular cardiomyopathy	77	1	DMD	0.019	0.019
6	Hypertrophic cardiomyopathy	90	1	DMD	0.023	0.023
6	Dilated cardiomyopathy	96	1	DMD	0.024	0.024
7	Antimicrobial peptides	45	2	LYZ,LTF	4.3e-05	0.0002758
7	Amyloid fiber formation	57	2	LYZ,LTF	6.895e-05	0.0002758
7	Neutrophil degranulation	408	2	LYZ,LTF	0.003463	0.006925
7	Triglyceride metabolism	27	1	FABP7	0.006808	0.011
7	Signaling by NOTCH3	44	1	FABP7	0.011	0.011
7	PPAR signaling pathway	75	1	FABP7	0.019	0.019
7	C-MYB transcription factor network	82	1	LYZ	0.021	0.021
7	Salivary secretion	93	1	LYZ	0.023	0.023
8	caspase cascade in apoptosis	21	2	CASP7,BIRC3	1.873e-05	0.0006467
8	hiv-1 nef: negative effector of fas and tnf	30	2	CASP7,BIRC3	3.819e-05	0.0006467
8	Apoptosis - multiple species	32	2	CASP7,BIRC3	4.344e-05	0.0006467
8	HIV-1 Nef: Negative effector of Fas and TNF-alpha	33	2	CASP7,BIRC3	4.619e-05	0.0006467
8	Caspase cascade in apoptosis	52	2	CASP7,BIRC3	0.0001145	0.001259
8	Keratinization	112	2	SPINK6,KLK13	0.0005274	0.004219
8	TNF signaling pathway	112	2	CASP7,BIRC3	0.0005274	0.004219
8	Apoptosis	136	2	CASP7,BIRC3	0.0007755	0.005429
8	west nile virus	6	1	CASP7	0.00202	0.012
8	Salmonella infection	249	2	CASP7,BIRC3	0.002567	0.013
8	sodd/tnfr1 signaling pathway	9	1	BIRC3	0.003029	0.014
8	b cell survival pathway	13	1	CASP7	0.004373	0.014
8	role of mitochondria in apoptotic signaling	13	1	BIRC3	0.004373	0.014
8	apoptotic signaling in response to dna damage	14	1	CASP7	0.004709	0.014
8	regulation of cell cycle progression by plk3	15	1	CASP7	0.005045	0.014
8	tnfr1 signaling pathway	17	1	BIRC3	0.005716	0.014
8	internal ribosome entry pathway	18	1	CASP7	0.006051	0.014
8	fas signaling pathway (cd95)	19	1	CASP7	0.006387	0.014
8	induction of apoptosis through dr3 and dr4/5 death receptors	21	1	CASP7	0.007057	0.014
8	RIPK1-mediated regulated necrosis	28	1	BIRC3	0.009401	0.015
8	CD40/CD40L signaling	29	1	BIRC3	0.009736	0.015
8	ceramide signaling pathway	30	1	BIRC3	0.01	0.015
8	trefoil factors initiate mucosal healing	31	1	CASP7	0.01	0.015
8	FAS (CD95) signaling pathway	32	1	BIRC3	0.011	0.015
8	FAS signaling pathway	33	1	CASP7	0.011	0.015
8	Pathways in cancer	531	2	CASP7,BIRC3	0.011	0.015
8	a6b1 and a6b4 Integrin signaling	35	1	CASP7	0.012	0.015
8	TNF signaling	39	1	BIRC3	0.013	0.015
8	TNF receptor signaling pathway	46	1	BIRC3	0.015	0.015
8	Apoptotic execution phase	47	1	CASP7	0.016	0.016
8	keratinocyte differentiation	47	1	BIRC3	0.016	0.016
8	Ceramide signaling pathway	48	1	BIRC3	0.016	0.016
8	Intrinsic Pathway for Apoptosis	53	1	CASP7	0.018	0.018
8	Legionellosis	57	1	CASP7	0.019	0.019
8	p75 (NTR)-mediated signaling	69	1	BIRC3	0.023	0.023
8	E2F transcription factor network	69	1	CASP7	0.023	0.023
8	Platinum drug resistance	73	1	BIRC3	0.024	0.024
8	Pertussis	76	1	CASP7	0.025	0.025
8	C-MYB transcription factor network	82	1	BIRC3	0.027	0.027
8	Small cell lung cancer	92	1	BIRC3	0.031	0.031
8	TNFR2 non-canonical NF-kB pathway	101	1	BIRC3	0.034	0.034
8	NF-kappa B signaling pathway	104	1	BIRC3	0.035	0.035
8	Toxoplasmosis	112	1	BIRC3	0.037	0.037
8	Ubiquitin mediated proteolysis	140	1	BIRC3	0.046	0.046
8	Toll-like Receptor Cascades	143	1	BIRC3	0.047	0.047
8	Non-alcoholic fatty liver disease	150	1	CASP7	0.05	0.05
9	Alzheimer disease-presenilin pathway	111	2	MMP12,CDH3	0.0002607	0.002085
9	Urokinase-type plasminogen activator (uPA) and uPAR-mediated signaling	42	1	MMP12	0.011	0.036
9	Cell junction organization	71	1	CDH3	0.018	0.036
9	Cadherin signaling pathway	100	1	CDH3	0.025	0.037
9	Cell adhesion molecules	149	1	CDH3	0.037	0.037
10	Pertussis	76	2	C1S,C1R	4.099e-05	0.0001308
10	Complement and coagulation cascades	85	2	C1S,C1R	5.127e-05	0.0001308
10	Staphylococcus aureus infection	96	2	C1S,C1R	6.54e-05	0.0001308
10	Systemic lupus erythematosus	136	2	C1S,C1R	0.0001313	0.0001371
10	Complement cascade	139	2	C1S,C1R	0.0001371	0.0001371
10	Coronavirus disease - COVID-19	232	2	C1S,C1R	0.0003819	0.0003819
10	classical complement pathway	13	1	C1S	0.002189	0.002189
10	Phagosome	152	1	C1R	0.025	0.025
11	Bladder cancer	41	2	ERBB2,TYMP	1.193e-05	0.0004652
11	Nucleotide catabolism	13	1	TYMP	0.002189	0.013
11	Nucleotide salvage	14	1	TYMP	0.002357	0.013
11	ErbB receptor signaling network	15	1	ERBB2	0.002526	0.013
11	ErbB4 signaling events	28	1	ERBB2	0.004712	0.013
11	a6b1 and a6b4 Integrin signaling	35	1	ERBB2	0.005888	0.013
11	ErbB2/ErbB3 signaling events	37	1	ERBB2	0.006224	0.013
11	Signaling by ERBB2	43	1	ERBB2	0.007231	0.013
11	Signaling by PTK6	51	1	ERBB2	0.008574	0.013
11	Pyrimidine metabolism	57	1	TYMP	0.00958	0.013
11	Endometrial cancer	58	1	ERBB2	0.009748	0.013
11	Validated targets of C-MYC transcriptional repression	60	1	ERBB2	0.01	0.013
11	Semaphorin interactions	63	1	ERBB2	0.011	0.013
11	Central carbon metabolism in cancer	70	1	ERBB2	0.012	0.013
11	Adherens junction	71	1	ERBB2	0.012	0.013
11	Non-small cell lung cancer	72	1	ERBB2	0.012	0.013
11	Platinum drug resistance	73	1	ERBB2	0.012	0.013
11	Pancreatic cancer	76	1	ERBB2	0.013	0.013
11	EGFR tyrosine kinase inhibitor resistance	79	1	ERBB2	0.013	0.013
11	Drug metabolism - other enzymes	80	1	TYMP	0.013	0.013
11	EGF receptor signaling pathway	82	1	ERBB2	0.014	0.014
11	ErbB signaling pathway	85	1	ERBB2	0.014	0.014
11	Endocrine resistance	97	1	ERBB2	0.016	0.016
11	Prostate cancer	97	1	ERBB2	0.016	0.016
11	HIF-1 signaling pathway	109	1	ERBB2	0.018	0.018
11	Breast cancer	147	1	ERBB2	0.025	0.025
11	Gastric cancer	149	1	ERBB2	0.025	0.025
11	Tight junction	169	1	ERBB2	0.028	0.028
11	Focal adhesion	201	1	ERBB2	0.034	0.034
11	Proteoglycans in cancer	205	1	ERBB2	0.034	0.034
11	PIP3 activates AKT signaling	232	1	ERBB2	0.039	0.039
11	RAF/MAP kinase cascade	235	1	ERBB2	0.039	0.039
11	Calcium signaling pathway	240	1	ERBB2	0.04	0.04
11	MAPK signaling pathway	294	1	ERBB2	0.049	0.049

## Sheet: ST7
Table S7. Functional enrichment results of the combined (V)HE network in functional categories from 12 different databases using STRING.
All genes from our combined VHE network
Category	Term	Description	No. genes	No. genes in input	Genes	P-value	FDR
COMPARTMENTS	GOCC:0001533	Cornified envelope	43	6	PI3|LCE1D|LOR|SPRR2B|SPRR2D|SPRR2A	3.3e-09	7.62e-06
COMPARTMENTS	GOCC:0005576	Extracellular region	2035	21	CCL22|LTF|PI3|LYZ|IL37|TNC|HAS3|C5orf46|SPINK6|DPP4|S100A7|S100A8|S100A9|LCN2|GIG25|IL4R|C1S|CHI3L2|C1R|MMP12|MSMB	1.86e-08	2.15e-05
COMPARTMENTS	GOCC:1990662	S100A9 complex	4	3	S100A7|S100A8|S100A9	6.1e-07	0.00047
COMPARTMENTS	GOCC:1990661	S100A8 complex	5	3	S100A7|S100A8|S100A9	9.74e-07	0.00056
COMPARTMENTS	GOCC:0045111	Intermediate filament cytoskeleton	116	5	KRT6C|KRT16|KRT17|S100A8|KRT6A	1.69e-05	0.0078
COMPARTMENTS	GOCC:0005882	Intermediate filament	73	4	KRT6C|KRT16|KRT17|KRT6A	5.15e-05	0.014
COMPARTMENTS	GOCC:0034774	Secretory granule lumen	230	6	LTF|LYZ|SERPINB3|S100A7|LCN2|GIG25	3.65e-05	0.014
COMPARTMENTS	GOCC:1990660	Calprotectin complex	4	2	S100A8|S100A9	0.0001	0.0237
COMPARTMENTS	GOCC:0035578	Azurophil granule lumen	92	4	LYZ|SERPINB3|S100A7|GIG25	0.00012	0.0256
COMPARTMENTS	GOCC:0005615	Extracellular space	985	10	LTF|LYZ|DPP4|S100A7|S100A8|S100A9|LCN2|GIG25|C1S|C1R	0.00024	0.0469
DISEASES	DOID:0050449	Pachyonychia congenita	5	5	KRT6C|KRT6B|KRT16|KRT17|KRT6A	2.68e-11	1.17e-07
DISEASES	DOID:3390	Palmoplantar keratosis	46	6	KRT6C|KRT6B|KRT16|KRT17|LOR|KRT6A	4.78e-09	1.04e-05
DISEASES	DOID:16	Integumentary system disease	534	9	KRT6C|KRT6B|CDH3|KRT16|KRT17|TMEM173|LOR|KRT6A|C1S	1.14e-05	0.0124
DISEASES	DOID:0111556	Steatocystoma multiplex	2	2	KRT17|KRT6A	4.12e-05	0.0353
DISEASES	DOID:0111708	Focal nonepidermolytic palmoplantar keratoderma	2	2	KRT16|KRT6A	4.12e-05	0.0353
DISEASES	DOID:37	Skin disease	481	8	KRT6C|KRT6B|KRT16|KRT17|TMEM173|LOR|KRT6A|C1S	4.04e-05	0.0353
GO Biological Process	GO:0030216	Keratinocyte differentiation	268	16	PI3|KRT6C|KRT6B|CDH3|KRT16|KRT17|LCE1D|SPINK6|LCE3A|S100A7|LOR|SPRR2B|SPRR2D|LCE1E|KRT6A|SPRR2A	1.58e-17	2.03e-13
GO Biological Process	GO:0031424	Keratinization	226	15	PI3|KRT6C|KRT6B|CDH3|KRT16|KRT17|LCE1D|SPINK6|LCE3A|LOR|SPRR2B|SPRR2D|LCE1E|KRT6A|SPRR2A	4.23e-17	2.72e-13
GO Biological Process	GO:0070268	Cornification	113	11	PI3|KRT6C|KRT6B|KRT16|KRT17|SPINK6|LOR|SPRR2B|SPRR2D|KRT6A|SPRR2A	1.99e-14	4.25e-11
GO Biological Process	GO:0006952	Defense response	1296	20	CCL22|LTF|PI3|LYZ|IL37|KRT16|TMEM173|LCE3A|PARP9|DPP4|S100A7|S100A8|S100A9|LCN2|KRT6A|GIG25|IL4R|C1S|CD207|C1R	4.69e-11	7.53e-08
GO Biological Process	GO:0098542	Defense response to other organism	900	17	CCL22|LTF|PI3|LYZ|KRT16|TMEM173|LCE3A|PARP9|S100A7|S100A8|S100A9|LCN2|KRT6A|IL4R|C1S|CD207|C1R	9.82e-11	1.4e-07
GO Biological Process	GO:0006959	Humoral immune response	275	11	CCL22|LTF|PI3|LYZ|S100A7|S100A8|S100A9|LCN2|KRT6A|C1S|C1R	1.86e-10	2.38e-07
GO Biological Process	GO:0051707	Response to other organism	1256	19	CCL22|LTF|PI3|LYZ|IL37|KRT16|TMEM173|LCE3A|PARP9|S100A7|S100A8|S100A9|LCN2|KRT6A|IL4R|C1S|CD207|C1R|MMP12	2.37e-10	2.76e-07
GO Biological Process	GO:0060429	Epithelium development	1109	18	PI3|KRT6C|KRT6B|CDH3|TNC|KRT16|KRT17|LCE1D|SPINK6|LCE3A|S100A7|LOR|SPRR2B|SPRR2D|LCE1E|KRT6A|SPRR2A|MMP12	2.69e-10	2.76e-07
GO Biological Process	GO:0019730	Antimicrobial humoral response	160	9	CCL22|LTF|PI3|LYZ|S100A7|S100A8|S100A9|LCN2|KRT6A	5.65e-10	4.84e-07
GO Biological Process	GO:0006955	Immune response	1588	20	CCL22|LTF|PI3|LYZ|IL37|SERPINB3|CD1A|KRT16|TMEM173|PARP9|S100A7|S100A8|S100A9|LCN2|KRT6A|GIG25|IL4R|LCP1|C1S|C1R	1.63e-09	1.31e-06
GO Biological Process	GO:0009605	Response to external stimulus	2310	23	CCL22|LTF|PI3|LYZ|IL37|TNC|KRT16|TMEM173|LCE3A|PARP9|DPP4|FABP7|S100A7|S100A8|S100A9|LCN2|KRT6A|TYMP|IL4R|C1S|CD207|C1R|MMP12	5.39e-09	4.07e-06
GO Biological Process	GO:0044419	Interspecies interaction between organisms	1899	21	CCL22|LTF|PI3|LYZ|IL37|SERPINB3|KRT16|TMEM173|LCE3A|PARP9|DPP4|S100A7|S100A8|S100A9|LCN2|KRT6A|IL4R|C1S|CD207|C1R|MMP12	5.51e-09	4.07e-06
GO Biological Process	GO:0002252	Immune effector process	969	15	LTF|LYZ|SERPINB3|TMEM173|PARP9|S100A7|S100A8|S100A9|LCN2|GIG25|IL4R|LCP1|C1S|CD207|C1R	2.25e-08	1.52e-05
GO Biological Process	GO:0042742	Defense response to bacterium	277	9	LTF|PI3|LYZ|LCE3A|S100A7|S100A8|S100A9|LCN2|KRT6A	5.57e-08	3.58e-05
GO Biological Process	GO:0051238	Sequestering of metal ion	11	4	S100A7|S100A8|S100A9|LCN2	5.86e-08	3.59e-05
GO Biological Process	GO:0012501	Programmed cell death	1054	15	PI3|KRT6C|KRT6B|BIRC3|KRT16|KRT17|SPINK6|S100A8|S100A9|LOR|SPRR2B|SPRR2D|LCN2|KRT6A|SPRR2A	6.72e-08	3.92e-05
GO Biological Process	GO:0002443	Leukocyte mediated immunity	641	12	LTF|LYZ|SERPINB3|TMEM173|S100A7|S100A8|S100A9|LCN2|GIG25|IL4R|C1S|C1R	1.02e-07	5.69e-05
GO Biological Process	GO:0002376	Immune system process	2481	22	CCL22|LTF|PI3|LYZ|IL37|SERPINB3|CD1A|KRT16|TMEM173|PARP9|DPP4|S100A7|S100A8|S100A9|LCN2|KRT6A|GIG25|IL4R|LCP1|C1S|CD207|C1R	1.12e-07	5.76e-05
GO Biological Process	GO:0045087	Innate immune response	703	12	CCL22|LTF|PI3|KRT16|TMEM173|PARP9|S100A7|S100A8|S100A9|LCN2|C1S|C1R	2.71e-07	0.00013
GO Biological Process	GO:0046916	Cellular transition metal ion homeostasis	108	6	MT4|LTF|HEPHL1|S100A8|S100A9|LCN2	5.52e-07	0.00025
GO Biological Process	GO:0002697	Regulation of immune effector process	418	9	BIRC3|CD1A|TMEM173|SERPINB4|PARP9|IL4R|C1S|C1R|MMP12	1.62e-06	0.00072
GO Biological Process	GO:0052548	Regulation of endopeptidase activity	418	9	LTF|PI3|BIRC3|SERPINB3|SPINK6|SERPINB4|S100A8|S100A9|GIG25	1.62e-06	0.00072
GO Biological Process	GO:0006950	Response to stress	3485	24	MT4|CCL22|LTF|PI3|LYZ|IL37|CDH3|TNC|KRT16|TMEM173|LCE3A|PARP9|DPP4|S100A7|S100A8|S100A9|LCN2|KRT6A|GIG25|IL4R|C1S|CD207|C1R|MMP12	2.49e-06	0.001
GO Biological Process	GO:0043312	Neutrophil degranulation	484	9	LTF|LYZ|SERPINB3|TMEM173|S100A7|S100A8|S100A9|LCN2|GIG25	5.23e-06	0.0019
GO Biological Process	GO:0002366	Leukocyte activation involved in immune response	626	10	LTF|LYZ|SERPINB3|TMEM173|S100A7|S100A8|S100A9|LCN2|GIG25|LCP1	5.53e-06	0.002
GO Biological Process	GO:0009617	Response to bacterium	634	10	LTF|PI3|LYZ|IL37|LCE3A|S100A7|S100A8|S100A9|LCN2|KRT6A	6.17e-06	0.002
GO Biological Process	GO:0031640	Killing of cells of other organism	91	5	CCL22|LTF|LYZ|LCE3A|KRT6A	5.47e-06	0.002
GO Biological Process	GO:0032101	Regulation of response to external stimulus	1013	12	LTF|IL37|BIRC3|TMEM173|SERPINB4|PARP9|DPP4|FABP7|S100A7|S100A8|S100A9|MMP12	1.15e-05	0.0031
GO Biological Process	GO:0061844	Antimicrobial humoral immune response mediated by antimicrobial peptide	113	5	CCL22|LTF|S100A7|S100A9|KRT6A	1.5e-05	0.0039
GO Biological Process	GO:0045321	Leukocyte activation	929	11	LTF|LYZ|SERPINB3|TMEM173|DPP4|S100A7|S100A8|S100A9|LCN2|GIG25|LCP1	2.86e-05	0.0071
GO Biological Process	GO:0070488	Neutrophil aggregation	2	2	S100A8|S100A9	4.12e-05	0.01
GO Biological Process	GO:0006954	Inflammatory response	515	8	CCL22|LYZ|IL37|KRT16|S100A8|S100A9|GIG25|IL4R	6.48e-05	0.0151
GO Biological Process	GO:0050688	Regulation of defense response to virus	81	4	BIRC3|TMEM173|PARP9|MMP12	7.58e-05	0.0174
GO Biological Process	GO:0032119	Sequestering of zinc ion	4	2	S100A8|S100A9	0.0001	0.0227
GO Biological Process	GO:0006882	Cellular zinc ion homeostasis	32	3	MT4|S100A8|S100A9	0.00011	0.0232
GO Biological Process	GO:0048513	Animal organ development	3197	20	LTF|PI3|KRT6C|KRT6B|CDH3|TNC|KRT16|KRT17|LCE1D|SPINK6|LCE3A|FABP7|S100A7|LOR|SPRR2B|SPRR2D|LCE1E|KRT6A|SPRR2A|LCP1	0.00011	0.0234
GO Biological Process	GO:0009615	Response to virus	293	6	CCL22|TMEM173|PARP9|LCN2|CD207|MMP12	0.00013	0.0279
GO Biological Process	GO:0050829	Defense response to Gram-negative bacterium	98	4	LTF|LYZ|LCE3A|S100A7	0.00015	0.0304
GO Biological Process	GO:0048584	Positive regulation of response to stimulus	2257	16	CCL22|LTF|IL37|BIRC3|CDH3|CD1A|CHP2|TMEM173|PARP9|S100A7|S100A8|S100A9|IL4R|C1S|C1R|MMP12	0.00017	0.0338
GO Biological Process	GO:0018119	Peptidyl-cysteine S-nitrosylation	6	2	S100A8|S100A9	0.00019	0.0366
GO Biological Process	GO:0035425	Autocrine signaling	7	2	SERPINB3|S100A8	0.00025	0.0444
GO Biological Process	GO:0050691	Regulation of defense response to virus by host	43	3	TMEM173|PARP9|MMP12	0.00025	0.0444
GO Biological Process	GO:0030154	Cell differentiation	3702	21	PI3|KRT6C|KRT6B|CDH3|TNC|KRT16|KRT17|LCE1D|SPINK6|LCE3A|FABP7|S100A7|S100A8|S100A9|LOR|SPRR2B|SPRR2D|LCE1E|KRT6A|SPRR2A|TYMP	0.00028	0.0498
GO Cellular Component	GO:0001533	Cornified envelope	45	6	PI3|LCE1D|LOR|SPRR2B|SPRR2D|SPRR2A	4.23e-09	6.84e-06
GO Cellular Component	GO:0005615	Extracellular space	3195	27	CCL22|LTF|PI3|KRT6C|KRT6B|LYZ|IL37|TNC|SERPINB3|CD1A|KRT16|C5orf46|SERPINB4|DPP4|S100A7|S100A8|S100A9|LCN2|KRT6A|GIG25|IL4R|LCP1|C1S|CHI3L2|C1R|MMP12|MSMB	4.02e-09	6.84e-06
GO Cellular Component	GO:0005576	Extracellular region	4166	30	CCL22|LTF|PI3|KRT6C|KRT6B|LYZ|IL37|TNC|PRSS53|SERPINB3|CD1A|KRT16|HAS3|C5orf46|SPINK6|SERPINB4|DPP4|S100A7|S100A8|S100A9|LCN2|KRT6A|GIG25|IL4R|LCP1|C1S|CHI3L2|C1R|MMP12|MSMB	1.28e-08	7.24e-06
GO Cellular Component	GO:0034774	Secretory granule lumen	324	8	LTF|LYZ|SERPINB3|S100A7|S100A8|S100A9|LCN2|GIG25	2.43e-06	0.001
GO Cellular Component	GO:0045111	Intermediate filament cytoskeleton	237	6	KRT6C|KRT6B|KRT16|KRT17|S100A8|KRT6A	4.29e-05	0.0104
GO Cellular Component	GO:0035578	Azurophil granule lumen	92	4	LYZ|SERPINB3|S100A7|GIG25	0.00012	0.0259
GO Cellular Component	GO:0005882	Intermediate filament	199	5	KRT6C|KRT6B|KRT16|KRT17|KRT6A	0.0002	0.0382
GO Cellular Component	GO:0070062	Extracellular exosome	2099	15	LTF|KRT6C|KRT6B|LYZ|SERPINB3|KRT16|C5orf46|DPP4|S100A8|S100A9|LCN2|KRT6A|GIG25|LCP1|C1R	0.00027	0.0461
GO Cellular Component	GO:0030141	Secretory granule	845	9	LTF|LYZ|SERPINB3|TMEM173|S100A7|S100A8|S100A9|LCN2|GIG25	0.00037	0.048
GO Molecular Function	GO:0004866	Endopeptidase inhibitor activity	181	7	LTF|PI3|BIRC3|SERPINB3|SPINK6|SERPINB4|GIG25	6.17e-07	0.002
GO Molecular Function	GO:0004857	Enzyme inhibitor activity	377	8	LTF|PI3|BIRC3|SERPINB3|SPINK6|SERPINB4|PARP9|GIG25	7.24e-06	0.0047
GO Molecular Function	GO:0004867	Serine-type endopeptidase inhibitor activity	98	5	PI3|SERPINB3|SPINK6|SERPINB4|GIG25	7.73e-06	0.0047
GO Molecular Function	GO:0017171	Serine hydrolase activity	179	6	LTF|AADAC|PRSS53|DPP4|C1S|C1R	9.21e-06	0.0047
GO Molecular Function	GO:0050786	RAGE receptor binding	12	3	S100A7|S100A8|S100A9	7.81e-06	0.0047
GO Molecular Function	GO:0005509	Calcium ion binding	703	10	CDH3|CHP2|S100A7|S100A7A|S100A8|S100A9|LCP1|C1S|C1R|MMP12	1.5e-05	0.0054
GO Molecular Function	GO:0004252	Serine-type endopeptidase activity	154	5	LTF|PRSS53|DPP4|C1S|C1R	6.28e-05	0.0203
GO Molecular Function	GO:0035662	Toll-like receptor 4 binding	4	2	S100A8|S100A9	0.0001	0.0302
GO Molecular Function	GO:0005200	Structural constituent of cytoskeleton	104	4	KRT6B|KRT16|LOR|KRT6A	0.00019	0.0476
GO Molecular Function	GO:0050544	Arachidonic acid binding	6	2	S100A8|S100A9	0.00019	0.0476
InterPro Domains	IPR026075	Small proline-rich protein/late cornified envelope protein	28	5	LCE1D|LCE3A|SPRR2B|SPRR2D|LCE1E	2.41e-08	0.00016
InterPro Domains	IPR001751	S100/Calbindin-D9k, conserved site	25	4	S100A7|S100A7A|S100A8|S100A9	9.92e-07	0.0031
InterPro Domains	IPR013787	S100/CaBP-9k-type, calcium binding, subdomain	29	4	S100A7|S100A7A|S100A8|S100A9	1.7e-06	0.0031
InterPro Domains	IPR018039	Intermediate filament protein, conserved site	62	5	KRT6C|KRT6B|KRT16|KRT17|KRT6A	9.16e-07	0.0031
InterPro Domains	IPR039008	Intermediate filament, rod domain	73	5	KRT6C|KRT6B|KRT16|KRT17|KRT6A	1.96e-06	0.0031
InterPro Domains	IPR018247	EF-Hand 1, calcium-binding site	174	6	CHP2|S100A7|S100A7A|S100A8|S100A9|LCP1	7.87e-06	0.0089
InterPro Domains	IPR028205	Late cornified envelope protein	17	3	LCE1D|LCE3A|LCE1E	1.94e-05	0.0188
InterPro Domains	IPR002048	EF-hand domain	225	6	CHP2|S100A7|S100A7A|S100A8|S100A9|LCP1	3.23e-05	0.0274
InterPro Domains	IPR028477	Protein S100-A7	2	2	S100A7|S100A7A	4.12e-05	0.031
InterPro Domains	IPR032444	Keratin type II head	25	3	KRT6C|KRT6B|KRT6A	5.49e-05	0.0372
InterPro Domains	IPR003054	Keratin, type II	26	3	KRT6C|KRT6B|KRT6A	6.11e-05	0.0376
InterPro Domains	IPR011992	EF-hand domain pair	263	6	CHP2|S100A7|S100A7A|S100A8|S100A9|LCP1	7.54e-05	0.0425
KEGG Pathways	hsa04657	IL-17 signaling pathway	92	5	S100A7|S100A7A|S100A8|S100A9|LCN2	5.76e-06	0.0019
KEGG Pathways	hsa05150	Staphylococcus aureus infection	86	4	KRT16|KRT17|C1S|C1R	9.48e-05	0.0159
Monarch Phenotype	HP:0007490	Linear arrays of macular hyperkeratoses in flexural areas	5	4	KRT6B|KRT16|KRT17|KRT6A	5.47e-09	1.6e-05
Monarch Phenotype	HP:0012035	Steatocystoma multiplex	4	4	KRT6B|KRT16|KRT17|KRT6A	3.05e-09	1.6e-05
Monarch Phenotype	HP:0025248	Eruptive vellus hair cyst	4	4	KRT6B|KRT16|KRT17|KRT6A	3.05e-09	1.6e-05
Monarch Phenotype	HP:0100803	Abnormality of the periungual region	15	5	KRT6B|KRT16|KRT17|TMEM173|KRT6A	1.62e-09	1.6e-05
Monarch Phenotype	HP:0001805	Onychogryposis	24	5	KRT6B|KRT16|KRT17|LOR|KRT6A	1.22e-08	2.41e-05
Monarch Phenotype	HP:0008401	Onychogryposis of toenails	7	4	KRT6B|KRT16|KRT17|KRT6A	1.43e-08	2.41e-05
Monarch Phenotype	HP:0030318	Angular cheilitis	7	4	KRT6B|KRT16|KRT17|KRT6A	1.43e-08	2.41e-05
Monarch Phenotype	HP:0030268	Hyperplastic callus formation	8	4	KRT6B|KRT16|KRT17|KRT6A	2.14e-08	2.65e-05
Monarch Phenotype	HP:0040036	Onychogryposis of fingernail	9	4	KRT6B|KRT16|KRT17|KRT6A	3.08e-08	3.4e-05
Monarch Phenotype	HP:0001818	Paronychia	11	4	KRT6B|KRT16|KRT17|KRT6A	5.86e-08	5.81e-05
Monarch Phenotype	HP:0007446	Palmoplantar blistering	11	4	KRT6B|KRT16|KRT17|KRT6A	5.86e-08	5.81e-05
Monarch Phenotype	HP:0007410	Palmoplantar hyperhidrosis	12	4	KRT6B|KRT16|KRT17|KRT6A	7.8e-08	6.45e-05
Monarch Phenotype	HP:0200040	Epidermoid cyst	12	4	KRT6B|KRT16|KRT17|KRT6A	7.8e-08	6.45e-05
Monarch Phenotype	HP:0030766	Ear pain	15	4	KRT6B|KRT16|KRT17|KRT6A	1.65e-07	0.00012
Monarch Phenotype	HP:0100798	Fingernail dysplasia	17	4	KRT6B|KRT16|KRT17|KRT6A	2.54e-07	0.00017
Monarch Phenotype	HP:0007502	Follicular hyperkeratosis	21	4	KRT6B|KRT16|KRT17|KRT6A	5.33e-07	0.00026
Monarch Phenotype	HP:0100872	Abnormality of the plantar skin of foot	175	7	KRT6C|KRT6B|KRT16|KRT17|LOR|KRT6A|C1R	4.96e-07	0.00026
Monarch Phenotype	HP:0002745	Oral leukoplakia	22	4	KRT6B|KRT16|KRT17|KRT6A	6.28e-07	0.0003
Monarch Phenotype	HP:0008404	Nail dystrophy	115	6	KRT6B|KRT16|KRT17|TMEM173|LOR|KRT6A	7.85e-07	0.00035
Monarch Phenotype	HP:0001609	Hoarse voice	72	5	KRT6B|KRT16|KRT17|KRT6A|C1R	1.84e-06	0.00079
Monarch Phenotype	HP:0040211	Abnormal skin morphology of the palm	215	7	KRT6C|KRT6B|KRT16|KRT17|LOR|KRT6A|C1R	1.88e-06	0.00079
Monarch Phenotype	HP:0011356	Regional abnormality of skin	324	8	KRT6C|KRT6B|KRT16|KRT17|TMEM173|LOR|KRT6A|C1R	2.43e-06	0.00093
Monarch Phenotype	HP:0012514	Lower limb pain	32	4	KRT6B|KRT16|KRT17|KRT6A	2.43e-06	0.00093
Monarch Phenotype	HP:0000695	Natal tooth	35	4	KRT6B|KRT16|KRT17|KRT6A	3.37e-06	0.0012
Monarch Phenotype	HP:0000962	Hyperkeratosis	240	7	KRT6C|KRT6B|CDH3|KRT16|KRT17|LOR|KRT6A	3.8e-06	0.0013
Monarch Phenotype	HP:0000972	Palmoplantar hyperkeratosis	156	6	KRT6C|KRT6B|KRT16|KRT17|LOR|KRT6A	4.3e-06	0.0014
Monarch Phenotype	HP:0000982	Palmoplantar keratoderma	147	5	KRT6C|KRT6B|KRT16|KRT17|KRT6A	5.07e-05	0.0136
Monarch Phenotype	HP:0031368	Intestinal perforation	4	2	TYMP|C1R	0.0001	0.0254
Monarch Phenotype	HP:0006308	Atrophy of alveolar ridges	5	2	C1S|C1R	0.00014	0.0347
Pfam	PF00038	Intermediate filament protein	72	5	KRT6C|KRT6B|KRT16|KRT17|KRT6A	1.84e-06	0.005
Pfam	PF01023	S-100/ICaBP type calcium binding domain	28	4	S100A7|S100A7A|S100A8|S100A9	1.49e-06	0.005
Pfam	PF14820	Small proline-rich 2	6	3	SPRR2B|SPRR2D|SPRR2A	1.46e-06	0.005
Pfam	PF14672	Late cornified envelope	17	3	LCE1D|LCE3A|LCE1E	1.94e-05	0.0167
Pfam	PF16208	Keratin type II head	25	3	KRT6C|KRT6B|KRT6A	5.49e-05	0.0378
Reactome Pathways	HSA-6809371	Formation of the cornified envelope	127	14	PI3|KRT6C|KRT6B|KRT16|KRT17|LCE1D|SPINK6|LCE3A|LOR|SPRR2B|SPRR2D|LCE1E|KRT6A|SPRR2A	7.11e-19	1.54e-15
Reactome Pathways	HSA-6799990	Metal sequestration by antimicrobial proteins	6	6	LTF|S100A7|S100A7A|S100A8|S100A9|LCN2	2.35e-13	1.7e-10
Reactome Pathways	HSA-6803157	Antimicrobial peptides	87	8	LTF|PI3|LYZ|S100A7|S100A7A|S100A8|S100A9|LCN2	1.41e-10	7.68e-08
Reactome Pathways	HSA-168256	Immune System	1956	20	CCL22|LTF|PI3|LYZ|IL37|BIRC3|SERPINB3|CD1A|TMEM173|S100A7|S100A7A|S100A8|S100A9|LCN2|GIG25|IL4R|LCP1|C1S|CD207|C1R	5.52e-08	2.4e-05
Reactome Pathways	HSA-168249	Innate Immune System	1025	14	LTF|PI3|LYZ|BIRC3|SERPINB3|TMEM173|S100A7|S100A7A|S100A8|S100A9|LCN2|GIG25|C1S|C1R	3.35e-07	0.00012
Reactome Pathways	HSA-6798695	Neutrophil degranulation	473	9	LTF|LYZ|SERPINB3|TMEM173|S100A7|S100A8|S100A9|LCN2|GIG25	4.36e-06	0.0012
SMART Domains	SM01391	Intermediate filament protein	67	5	KRT6C|KRT6B|KRT16|KRT17|KRT6A	1.31e-06	0.00095
STRING Clusters	CL:36240	Mixed, incl. Keratinization, and S-100/ICaBP type calcium binding domain	90	13	PI3|SERPINB3|LCE1D|SPINK6|LCE3A|SERPINB4|S100A7|S100A7A|LOR|SPRR2B|SPRR2D|LCE1E|SPRR2A	5.64e-19	2.56e-15
STRING Clusters	CL:36241	Keratinization, and S-100/ICaBP type calcium binding domain	73	12	PI3|SERPINB3|LCE1D|LCE3A|SERPINB4|S100A7|S100A7A|LOR|SPRR2B|SPRR2D|LCE1E|SPRR2A	3.5e-18	7.95e-15
STRING Clusters	CL:36242	Keratinization, and S-100/ICaBP type calcium binding domain	64	10	PI3|LCE1D|LCE3A|S100A7|S100A7A|LOR|SPRR2B|SPRR2D|LCE1E|SPRR2A	4.32e-15	6.54e-12
STRING Clusters	CL:36246	Small proline-rich protein/late cornified envelope protein, and Ichthyosis vulgaris	36	8	PI3|LCE1D|LCE3A|LOR|SPRR2B|SPRR2D|LCE1E|SPRR2A	2.28e-13	2.59e-10
STRING Clusters	CL:36284	Mixed, incl. Small proline-rich 2, and Cornifin (SPRR1)	17	5	PI3|LOR|SPRR2B|SPRR2D|SPRR2A	2.73e-09	2.07e-06
STRING Clusters	CL:18848	Mixed, incl. Immunoregulatory interactions between a Lymphoid and a non-Lymphoid cell, and AIG1-type guanine nucleotide-binding (G) domain	120	5	CD1A|LAPTM5|S100A8|S100A9|CD207	1.98e-05	0.0129
STRING Clusters	CL:36140	Keratin type II head, and Large cell acanthoma	22	3	KRT6C|KRT16|KRT6A	3.88e-05	0.022
TISSUES	BTO:0000435	Stratum spinosum	106	9	PI3|KRT6B|CD1A|KRT16|S100A7|S100A8|S100A9|SPRR2D|CD207	1.77e-11	3.37e-08
TISSUES	BTO:0000404	Epidermis	277	11	PI3|KRT6B|CD1A|KRT16|S100A7|S100A7A|S100A8|S100A9|LOR|SPRR2D|CD207	2e-10	1.42e-07
TISSUES	BTO:0001253	Skin	1069	18	PI3|KRT6C|KRT6B|CDH3|CD1A|KRT16|KRT17|S100A7|S100A7A|S100A8|S100A9|LOR|SPRR2B|SPRR2D|KRT6A|GIG25|CD207|C1R	1.49e-10	1.42e-07
TISSUES	BTO:0000634	Integument	1970	22	LTF|PI3|KRT6C|KRT6B|CDH3|CD1A|KRT16|KRT17|DPP4|S100A7|S100A7A|S100A8|S100A9|LOR|SPRR2B|SPRR2D|KRT6A|GIG25|LCP1|CD207|C1R|MSMB	1.66e-09	7.88e-07
TISSUES	BTO:0001470	Epidermal cell	185	9	PI3|KRT6B|CD1A|KRT16|S100A7|S100A8|S100A9|SPRR2D|CD207	1.91e-09	7.88e-07
TISSUES	BTO:0000667	Keratinocyte	99	7	PI3|KRT6B|KRT16|S100A7|S100A8|S100A9|SPRR2D	1.21e-08	3.82e-06
TISSUES	BTO:0001090	Mouth	482	9	LTF|LYZ|CDH3|KRT17|S100A8|S100A9|SPRR2D|KRT6A|SPRR2A	5.06e-06	0.0013
TISSUES	BTO:0001493	Trunk	927	12	LTF|KRT6B|CD1A|KRT16|KRT17|PARP9|FABP7|S100A8|KRT6A|SNTB1|IL4R|LCP1	4.72e-06	0.0013
TISSUES	BTO:0000959	Esophagus	105	5	KRT6C|KRT16|SERPINB4|LCN2|MMP12	1.07e-05	0.0023
TISSUES	BTO:0001385	Tongue	119	5	CDH3|KRT17|S100A8|SPRR2D|SPRR2A	1.91e-05	0.0036
TISSUES	BTO:0000392	Plasma cell	137	5	DPP4|LCN2|GIG25|C1S|C1R	3.66e-05	0.0063
TISSUES	BTO:0001049	Pharynx	68	4	LTF|LYZ|S100A8|KRT6A	3.95e-05	0.0063
TISSUES	BTO:0000801	Macrophage	71	4	CCL22|CD1A|CD207|MMP12	4.64e-05	0.0068
TISSUES	BTO:0001208	Larynx	32	3	KRT6B|KRT17|KRT6A	0.00011	0.0137
TISSUES	BTO:0000344	Stratum corneum	6	2	PI3|LOR	0.00019	0.0227
TISSUES	BTO:0000705	Langerhans cell	6	2	CD1A|CD207	0.00019	0.0227
TISSUES	BTO:0000058	Alimentary canal	1865	14	LTF|AADAC|KRT6C|LYZ|CHP2|KRT16|SERPINB4|DPP4|S100A8|LCN2|KRT6A|C1S|C1R|MMP12	0.00028	0.0292
TISSUES	BTO:0000141	Bone marrow	478	7	LTF|LAPTM5|DPP4|LCN2|GIG25|C1S|C1R	0.00028	0.0292
TISSUES	BTO:0001486	Skeletal system	1203	11	LTF|TNC|LAPTM5|DPP4|S100A8|LCN2|GIG25|SNTB1|C1S|CHI3L2|C1R	0.00028	0.0292
UniProt Keywords	KW-0417	Keratinization	38	6	LCE1D|LCE3A|LOR|SPRR2B|SPRR2D|LCE1E	1.68e-09	8.49e-07
UniProt Keywords	KW-1007	Palmoplantar keratoderma	36	6	KRT6C|KRT6B|KRT16|KRT17|LOR|KRT6A	1.26e-09	8.49e-07
UniProt Keywords	KW-0964	Secreted	1818	20	CCL22|LTF|PI3|LYZ|IL37|TNC|PRSS53|C5orf46|SPINK6|DPP4|S100A7|S100A8|S100A9|LCN2|GIG25|IL4R|CHI3L2|C1R|MMP12|MSMB	1.63e-08	3.67e-06
UniProt Keywords	KW-0038	Ectodermal dysplasia	49	5	KRT6B|CDH3|KRT16|KRT17|KRT6A	3.08e-07	5.2e-05
UniProt Keywords	KW-0391	Immunity	522	10	LTF|CD1A|TMEM173|PARP9|S100A8|S100A9|LCN2|IL4R|C1S|C1R	1.12e-06	0.00015
UniProt Keywords	KW-0403	Intermediate filament	75	5	KRT6C|KRT6B|KRT16|KRT17|KRT6A	2.22e-06	0.00025
UniProt Keywords	KW-0722	Serine protease inhibitor	80	5	PI3|SERPINB3|SPINK6|SERPINB4|GIG25	3e-06	0.00029
UniProt Keywords	KW-0929	Antimicrobial	93	5	LTF|LYZ|LCE3A|S100A8|S100A9	6.06e-06	0.00051
UniProt Keywords	KW-0399	Innate immunity	324	7	TMEM173|PARP9|S100A8|S100A9|LCN2|C1S|C1R	2.55e-05	0.0017
UniProt Keywords	KW-0416	Keratin	136	5	KRT6C|KRT6B|KRT16|KRT17|KRT6A	3.54e-05	0.0021
UniProt Keywords	KW-0720	Serine protease	135	5	LTF|PRSS53|DPP4|C1S|C1R	3.42e-05	0.0021
UniProt Keywords	KW-1015	Disulfide bond	3304	21	CCL22|LTF|AADAC|PI3|LYZ|TNC|PRSS53|CD1A|HEPHL1|SPINK6|DPP4|S100A7|LOR|LCN2|IL4R|C1S|CD207|CHI3L2|C1R|MMP12|MSMB	5.32e-05	0.0028
UniProt Keywords	KW-0106	Calcium	875	10	CDH3|CHP2|S100A7|S100A7A|S100A8|S100A9|SNTB1|LCP1|C1S|MMP12	9.35e-05	0.0045
UniProt Keywords	KW-0145	Chemotaxis	95	4	CCL22|S100A8|S100A9|TYMP	0.00014	0.0062
UniProt Keywords	KW-0732	Signal	3233	19	CCL22|LTF|PI3|LYZ|CDH3|TNC|PRSS53|CD1A|HEPHL1|C5orf46|SPINK6|LCN2|GIG25|IL4R|C1S|CHI3L2|C1R|MMP12|MSMB	0.00041	0.0173
UniProt Keywords	KW-0621	Polymorphism	11669	42	MT4|CCL22|LTF|AADAC|PI3|KRT6C|KRT6B|LYZ|IL37|BIRC3|CDH3|TNC|SERPINB3|CD1A|LAPTM5|CHP2|HAS3|HEPHL1|C5orf46|LCE1D|SPINK6|TMEM173|LCE3A|PARP9|FABP7|S100A7|S100A7A|S100A9|LOR|SPRR2D|LCE1E|KRT6A|GIG25|TYMP|IL4R|LCP1|C1S|CD207|CHI3L2|C1R|MMP12|MSMB	0.001	0.0405
UniProt Keywords	KW-0248	Ehlers-Danlos syndrome	17	2	C1S|C1R	0.0011	0.043
UniProt Keywords	KW-0410	Iron transport	18	2	LTF|LCN2	0.0013	0.0452

## Sheet: ST8
Table S8. Functional enrichment results of the combined (V)HE network in functional categories from 12 different databases using STRING.
Genes from our combined VHE netwrk with a high than average skin tissue expression (STRING score>2.5 in skin)
Category	Term	Description	No. genes	No. genes in input	Genes	P-value	FDR
COMPARTMENTS	GOCC:0001533	Cornified envelope	43	6	TGM1|PI3|LOR|SPRR2B|SPRR2D|SPRR2A	1.76e-09	4.06e-06
COMPARTMENTS	GOCC:0005576	Extracellular region	2035	21	CCL22|PI3|RAC2|CHI3L1|LYZ|IL37|TNC|EGFR|SPINK6|DPP4|STAT1|S100A7|S100A8|S100A9|LCN2|GIG25|IL4R|C1S|CXCR4|C1R|KLK13	2.06e-09	4.06e-06
COMPARTMENTS	GOCC:0005615	Extracellular space	985	14	RAC2|CHI3L1|LYZ|EGFR|DPP4|STAT1|S100A7|S100A8|S100A9|LCN2|GIG25|C1S|CXCR4|C1R	5.1e-08	3.93e-05
COMPARTMENTS	GOCC:0031983	Vesicle lumen	240	8	NFKB1|CHI3L1|LYZ|EGFR|SERPINB3|S100A7|LCN2|GIG25	1.2e-07	6.93e-05
COMPARTMENTS	GOCC:1990662	S100A9 complex	4	3	S100A7|S100A8|S100A9	4.48e-07	0.00021
COMPARTMENTS	GOCC:1990661	S100A8 complex	5	3	S100A7|S100A8|S100A9	7.16e-07	0.00028
COMPARTMENTS	GOCC:0034774	Secretory granule lumen	230	7	NFKB1|CHI3L1|LYZ|SERPINB3|S100A7|LCN2|GIG25	1.43e-06	0.00047
COMPARTMENTS	GOCC:0110165	Cellular anatomical entity	13853	46	TGM1|CCL22|NFKB1|PI3|RAC2|KRT6C|KRT6B|CHI3L1|LYZ|EP300|IL37|SLC9A1|CDH3|STAT3|TNC|ERBB2|EGFR|SERPINB3|CD1A|KRT16|FOS|KRT17|SPINK6|DPP4|STAT1|S100A7|S100A7A|S100A8|S100A9|LOR|SPRR2B|SPRR2D|CASP7|JUN|LCN2|KRT6A|SPRR2A|GIG25|IL4R|C1S|CD207|CXCR4|CREB1|BRCA1|C1R|KLK13	1.86e-06	0.00048
COMPARTMENTS	GOCC:0005737	Cytoplasm	7871	34	TGM1|NFKB1|RAC2|KRT6B|CHI3L1|LYZ|EP300|IL37|SLC9A1|STAT3|ERBB2|EGFR|SERPINB3|KRT16|FOS|KRT17|DPP4|STAT1|S100A7|S100A7A|S100A8|S100A9|LOR|SPRR2B|SPRR2D|CASP7|LCN2|KRT6A|SPRR2A|GIG25|CD207|CXCR4|BRCA1|KLK13	8.48e-06	0.002
COMPARTMENTS	GOCC:0045111	Intermediate filament cytoskeleton	116	5	KRT6C|KRT16|KRT17|S100A8|KRT6A	1.03e-05	0.0022
COMPARTMENTS	GOCC:0031982	Vesicle	2051	16	TGM1|NFKB1|RAC2|CHI3L1|LYZ|ERBB2|EGFR|SERPINB3|DPP4|S100A7|S100A9|LCN2|GIG25|CD207|CXCR4|C1R	1.35e-05	0.0026
COMPARTMENTS	GOCC:0035580	Specific granule lumen	62	4	NFKB1|CHI3L1|LYZ|LCN2	1.87e-05	0.0033
COMPARTMENTS	GOCC:0005882	Intermediate filament	73	4	KRT6C|KRT16|KRT17|KRT6A	3.45e-05	0.0057
COMPARTMENTS	GOCC:0005925	Focal adhesion	255	6	RAC2|SLC9A1|TNC|EGFR|DPP4|S100A7	3.56e-05	0.0057
COMPARTMENTS	GOCC:0035578	Azurophil granule lumen	92	4	LYZ|SERPINB3|S100A7|GIG25	8.18e-05	0.0111
COMPARTMENTS	GOCC:1990660	Calprotectin complex	4	2	S100A8|S100A9	8.38e-05	0.0111
COMPARTMENTS	GOCC:0043230	Extracellular organelle	451	7	CHI3L1|DPP4|S100A8|S100A9|LCN2|CXCR4|C1R	0.0001	0.0123
COMPARTMENTS	GOCC:0031410	Cytoplasmic vesicle	1709	13	NFKB1|RAC2|CHI3L1|LYZ|ERBB2|EGFR|SERPINB3|DPP4|S100A7|LCN2|GIG25|CD207|CXCR4	0.00014	0.0166
COMPARTMENTS	GOCC:0005622	Intracellular	11202	39	TGM1|NFKB1|PI3|RAC2|KRT6C|KRT6B|CHI3L1|LYZ|EP300|IL37|SLC9A1|STAT3|ERBB2|EGFR|SERPINB3|KRT16|FOS|KRT17|DPP4|STAT1|S100A7|S100A7A|S100A8|S100A9|LOR|SPRR2B|SPRR2D|CASP7|JUN|LCN2|KRT6A|SPRR2A|GIG25|IL4R|CD207|CXCR4|CREB1|BRCA1|KLK13	0.00017	0.018
COMPARTMENTS	GOCC:0070013	Intracellular organelle lumen	2812	17	NFKB1|CHI3L1|LYZ|EP300|STAT3|EGFR|SERPINB3|FOS|STAT1|S100A7|LOR|CASP7|JUN|LCN2|GIG25|CREB1|BRCA1	0.00017	0.018
COMPARTMENTS	GOCC:0005829	Cytosol	2919	17	TGM1|NFKB1|RAC2|KRT6B|EP300|IL37|STAT3|ERBB2|KRT16|FOS|KRT17|STAT1|S100A7|S100A7A|S100A8|S100A9|CASP7	0.00028	0.0245
COMPARTMENTS	GOCC:0005886	Plasma membrane	3531	19	TGM1|PI3|SLC9A1|CDH3|STAT3|ERBB2|EGFR|CD1A|DPP4|S100A8|S100A9|LOR|SPRR2B|SPRR2D|JUN|SPRR2A|IL4R|CXCR4|BRCA1	0.00029	0.0246
COMPARTMENTS	GOCC:0062167	Complement component C1q complex	11	2	C1S|C1R	0.00043	0.0356
COMPARTMENTS	GOCC:0030313	Cell envelope	12	2	DPP4|LOR	0.0005	0.04
COMPARTMENTS	GOCC:1903561	Extracellular vesicle	444	6	CHI3L1|DPP4|S100A9|LCN2|CXCR4|C1R	0.00068	0.0464
DISEASES	DOID:0050449	Pachyonychia congenita	5	5	KRT6C|KRT6B|KRT16|KRT17|KRT6A	1.58e-11	6.92e-08
DISEASES	DOID:3390	Palmoplantar keratosis	46	6	KRT6C|KRT6B|KRT16|KRT17|LOR|KRT6A	2.55e-09	5.56e-06
DISEASES	DOID:7	Disease of anatomical entity	4452	29	TGM1|NFKB1|RAC2|KRT6C|KRT6B|CHI3L1|EP300|SLC9A1|CDH3|STAT3|TNC|ERBB2|EGFR|CD1A|KRT16|KRT17|SERPINB4|DPP4|STAT1|S100A8|LOR|LCN2|KRT6A|GIG25|C1S|CD207|CXCR4|BRCA1|C1R	1.26e-08	1.38e-05
DISEASES	DOID:4	Disease	5921	33	TGM1|NFKB1|RAC2|KRT6C|KRT6B|CHI3L1|LYZ|EP300|SLC9A1|CDH3|STAT3|TNC|ERBB2|EGFR|CD1A|KRT16|FOS|KRT17|SERPINB4|DPP4|STAT1|S100A8|LOR|SPRR2B|JUN|LCN2|KRT6A|GIG25|C1S|CD207|CXCR4|BRCA1|C1R	2.06e-08	1.8e-05
DISEASES	DOID:16	Integumentary system disease	534	11	TGM1|KRT6C|KRT6B|CDH3|EGFR|KRT16|KRT17|STAT1|LOR|KRT6A|C1S	4.85e-08	3.53e-05
DISEASES	DOID:14566	Disease of cellular proliferation	1012	14	EP300|STAT3|ERBB2|EGFR|CD1A|FOS|KRT17|SERPINB4|S100A8|JUN|GIG25|CD207|CXCR4|BRCA1	7.11e-08	4.43e-05
DISEASES	DOID:162	Cancer	895	13	EP300|STAT3|ERBB2|EGFR|CD1A|FOS|KRT17|S100A8|JUN|GIG25|CD207|CXCR4|BRCA1	1.34e-07	7.31e-05
DISEASES	DOID:37	Skin disease	481	10	TGM1|KRT6C|KRT6B|EGFR|KRT16|KRT17|STAT1|LOR|KRT6A|C1S	1.99e-07	9.66e-05
DISEASES	DOID:0050686	Organ system cancer	677	11	EP300|STAT3|ERBB2|EGFR|CD1A|KRT17|S100A8|GIG25|CD207|CXCR4|BRCA1	5.03e-07	0.00022
DISEASES	DOID:0050687	Cell type cancer	406	8	ERBB2|EGFR|CD1A|KRT17|S100A8|GIG25|CD207|BRCA1	5.63e-06	0.0022
DISEASES	DOID:934	Viral infectious disease	108	5	STAT3|DPP4|STAT1|LCN2|CXCR4	7.34e-06	0.0027
DISEASES	DOID:8719	In situ carcinoma	14	3	ERBB2|EGFR|BRCA1	8.57e-06	0.0029
DISEASES	DOID:0111556	Steatocystoma multiplex	2	2	KRT17|KRT6A	3.36e-05	0.0098
DISEASES	DOID:0111708	Focal nonepidermolytic palmoplantar keratoderma	2	2	KRT16|KRT6A	3.36e-05	0.0098
DISEASES	DOID:10534	Stomach cancer	27	3	ERBB2|EGFR|S100A8	5e-05	0.0129
DISEASES	DOID:0050739	Autosomal genetic disease	2323	16	TGM1|KRT6C|KRT6B|EP300|SLC9A1|CDH3|STAT3|KRT16|KRT17|STAT1|LOR|SPRR2B|KRT6A|GIG25|CXCR4|BRCA1	6.31e-05	0.0153
DISEASES	DOID:0050736	Autosomal dominant disease	1163	11	KRT6C|KRT6B|EP300|STAT3|KRT16|KRT17|LOR|KRT6A|GIG25|CXCR4|BRCA1	7.98e-05	0.0183
DISEASES	DOID:0050671	Female breast cancer	4	2	ERBB2|BRCA1	8.38e-05	0.0183
DISEASES	DOID:0060074	Ductal carcinoma in situ	4	2	ERBB2|BRCA1	8.38e-05	0.0183
DISEASES	DOID:6741	Bilateral breast cancer	4	2	ERBB2|BRCA1	8.38e-05	0.0183
DISEASES	DOID:7146	Langerhans cell sarcoma	4	2	CD1A|CD207	8.38e-05	0.0183
DISEASES	DOID:299	Adenocarcinoma	108	4	ERBB2|EGFR|S100A8|BRCA1	0.00015	0.026
DISEASES	DOID:225	Syndrome	1059	10	KRT6C|KRT6B|EP300|CDH3|KRT16|KRT17|LOR|SPRR2B|KRT6A|BRCA1	0.00018	0.0293
DISEASES	DOID:8536	Herpes zoster	7	2	STAT3|STAT1	0.0002	0.0312
DISEASES	DOID:10283	Prostate cancer	49	3	EP300|STAT3|BRCA1	0.00026	0.0382
DISEASES	DOID:2571	Langerhans-cell histiocytosis	9	2	CD1A|CD207	0.0003	0.0416
DISEASES	DOID:3717	Gastric adenocarcinoma	10	2	ERBB2|S100A8	0.00037	0.0456
DISEASES	DOID:1612	Breast cancer	58	3	ERBB2|EGFR|BRCA1	0.00042	0.0497
GO Biological Process	GO:0070268	Cornification	113	13	TGM1|PI3|KRT6C|KRT6B|KRT16|KRT17|SPINK6|LOR|SPRR2B|SPRR2D|KRT6A|SPRR2A|KLK13	1.97e-18	2.53e-14
GO Biological Process	GO:0008219	Cell death	1091	24	TGM1|NFKB1|PI3|KRT6C|KRT6B|CHI3L1|EP300|SLC9A1|KRT16|KRT17|SPINK6|S100A8|S100A9|LOR|SPRR2B|SPRR2D|CASP7|JUN|LCN2|KRT6A|SPRR2A|CXCR4|BRCA1|KLK13	4.68e-18	3.01e-14
GO Biological Process	GO:0006952	Defense response	1296	25	CCL22|NFKB1|PI3|CHI3L1|LYZ|EP300|IL37|STAT3|EGFR|KRT16|FOS|DPP4|STAT1|S100A7|S100A8|S100A9|JUN|LCN2|KRT6A|GIG25|IL4R|C1S|CD207|CXCR4|C1R	1.45e-17	6.19e-14
GO Biological Process	GO:0012501	Programmed cell death	1054	23	TGM1|NFKB1|PI3|KRT6C|KRT6B|CHI3L1|EP300|KRT16|KRT17|SPINK6|S100A8|S100A9|LOR|SPRR2B|SPRR2D|CASP7|JUN|LCN2|KRT6A|SPRR2A|CXCR4|BRCA1|KLK13	3.73e-17	1.2e-13
GO Biological Process	GO:0030216	Keratinocyte differentiation	268	15	TGM1|PI3|KRT6C|KRT6B|CDH3|KRT16|KRT17|SPINK6|S100A7|LOR|SPRR2B|SPRR2D|KRT6A|SPRR2A|KLK13	8.39e-17	2.16e-13
GO Biological Process	GO:0031424	Keratinization	226	14	TGM1|PI3|KRT6C|KRT6B|CDH3|KRT16|KRT17|SPINK6|LOR|SPRR2B|SPRR2D|KRT6A|SPRR2A|KLK13	2.75e-16	5.9e-13
GO Biological Process	GO:0043588	Skin development	382	16	TGM1|PI3|KRT6C|KRT6B|CDH3|EGFR|KRT16|KRT17|SPINK6|S100A7|LOR|SPRR2B|SPRR2D|KRT6A|SPRR2A|KLK13	5.19e-16	9.53e-13
GO Biological Process	GO:0060429	Epithelium development	1109	22	TGM1|PI3|KRT6C|KRT6B|EP300|CDH3|TNC|EGFR|KRT16|KRT17|SPINK6|STAT1|S100A7|LOR|SPRR2B|SPRR2D|JUN|KRT6A|SPRR2A|CXCR4|CREB1|KLK13	1.67e-15	2.39e-12
GO Biological Process	GO:0008544	Epidermis development	419	16	TGM1|PI3|KRT6C|KRT6B|CDH3|EGFR|KRT16|KRT17|SPINK6|S100A7|LOR|SPRR2B|SPRR2D|KRT6A|SPRR2A|KLK13	2.09e-15	2.68e-12
GO Biological Process	GO:0009605	Response to external stimulus	2310	28	CCL22|NFKB1|PI3|RAC2|CHI3L1|LYZ|EP300|IL37|SLC9A1|TNC|ERBB2|EGFR|KRT16|FOS|DPP4|STAT1|S100A7|S100A8|S100A9|JUN|LCN2|KRT6A|IL4R|C1S|CD207|CXCR4|CREB1|C1R	8.34e-15	9.74e-12
GO Biological Process	GO:0030855	Epithelial cell differentiation	673	18	TGM1|PI3|KRT6C|KRT6B|CDH3|KRT16|KRT17|SPINK6|S100A7|LOR|SPRR2B|SPRR2D|JUN|KRT6A|SPRR2A|CXCR4|CREB1|KLK13	9.88e-15	1.06e-11
GO Biological Process	GO:0009888	Tissue development	1760	25	TGM1|PI3|KRT6C|KRT6B|CHI3L1|EP300|SLC9A1|CDH3|TNC|EGFR|KRT16|FOS|KRT17|SPINK6|STAT1|S100A7|LOR|SPRR2B|SPRR2D|JUN|KRT6A|SPRR2A|CXCR4|CREB1|KLK13	1.66e-14	1.64e-11
GO Biological Process	GO:0044419	Interspecies interaction between organisms	1899	25	CCL22|NFKB1|PI3|LYZ|EP300|IL37|STAT3|EGFR|SERPINB3|KRT16|FOS|DPP4|STAT1|S100A7|S100A8|S100A9|JUN|LCN2|KRT6A|IL4R|C1S|CD207|CXCR4|CREB1|C1R	9.28e-14	8.52e-11
GO Biological Process	GO:0006950	Response to stress	3485	31	CCL22|NFKB1|PI3|CHI3L1|LYZ|EP300|IL37|SLC9A1|CDH3|STAT3|TNC|ERBB2|EGFR|KRT16|FOS|DPP4|STAT1|S100A7|S100A8|S100A9|JUN|LCN2|KRT6A|GIG25|IL4R|C1S|CD207|CXCR4|CREB1|BRCA1|C1R	4.73e-13	4.06e-10
GO Biological Process	GO:0006954	Inflammatory response	515	15	CCL22|NFKB1|CHI3L1|LYZ|IL37|STAT3|EGFR|KRT16|FOS|S100A8|S100A9|JUN|GIG25|IL4R|CXCR4	8.34e-13	6.7e-10
GO Biological Process	GO:0006955	Immune response	1588	21	CCL22|NFKB1|PI3|CHI3L1|LYZ|IL37|STAT3|SERPINB3|CD1A|KRT16|STAT1|S100A7|S100A8|S100A9|LCN2|KRT6A|GIG25|IL4R|C1S|CXCR4|C1R	2.15e-11	1.63e-08
GO Biological Process	GO:0051707	Response to other organism	1256	19	CCL22|NFKB1|PI3|LYZ|IL37|KRT16|FOS|STAT1|S100A7|S100A8|S100A9|JUN|LCN2|KRT6A|IL4R|C1S|CD207|CXCR4|C1R	2.97e-11	2.12e-08
GO Biological Process	GO:0002376	Immune system process	2481	25	CCL22|NFKB1|PI3|CHI3L1|LYZ|EP300|IL37|STAT3|SERPINB3|CD1A|KRT16|DPP4|STAT1|S100A7|S100A8|S100A9|JUN|LCN2|KRT6A|GIG25|IL4R|C1S|CD207|CXCR4|C1R	3.53e-11	2.27e-08
GO Biological Process	GO:0030154	Cell differentiation	3702	29	TGM1|PI3|RAC2|KRT6C|KRT6B|EP300|SLC9A1|CDH3|STAT3|TNC|ERBB2|EGFR|KRT16|FOS|KRT17|SPINK6|STAT1|S100A7|S100A8|S100A9|LOR|SPRR2B|SPRR2D|JUN|KRT6A|SPRR2A|CXCR4|CREB1|KLK13	1.4e-10	8.18e-08
GO Biological Process	GO:0048513	Animal organ development	3197	27	TGM1|PI3|KRT6C|KRT6B|CHI3L1|EP300|SLC9A1|CDH3|STAT3|TNC|ERBB2|EGFR|KRT16|FOS|KRT17|SPINK6|STAT1|S100A7|LOR|SPRR2B|SPRR2D|JUN|KRT6A|SPRR2A|CXCR4|CREB1|KLK13	1.97e-10	1.1e-07
GO Biological Process	GO:0006959	Humoral immune response	275	10	CCL22|PI3|LYZ|S100A7|S100A8|S100A9|LCN2|KRT6A|C1S|C1R	1.16e-09	5.94e-07
GO Biological Process	GO:0098542	Defense response to other organism	900	15	CCL22|NFKB1|PI3|LYZ|KRT16|STAT1|S100A7|S100A8|S100A9|LCN2|KRT6A|IL4R|C1S|CD207|C1R	1.78e-09	8.81e-07
GO Biological Process	GO:0048731	System development	4426	30	TGM1|PI3|RAC2|KRT6C|KRT6B|CHI3L1|EP300|SLC9A1|CDH3|STAT3|TNC|ERBB2|EGFR|KRT16|FOS|KRT17|SPINK6|STAT1|S100A7|S100A8|S100A9|LOR|SPRR2B|SPRR2D|JUN|KRT6A|SPRR2A|CXCR4|CREB1|KLK13	1.9e-09	9.05e-07
GO Biological Process	GO:0009612	Response to mechanical stimulus	212	9	NFKB1|CHI3L1|SLC9A1|TNC|EGFR|FOS|STAT1|JUN|CXCR4	2.34e-09	1.07e-06
GO Biological Process	GO:0002252	Immune effector process	969	15	NFKB1|CHI3L1|LYZ|STAT3|SERPINB3|STAT1|S100A7|S100A8|S100A9|LCN2|GIG25|IL4R|C1S|CD207|C1R	4.79e-09	2.12e-06
GO Biological Process	GO:0019730	Antimicrobial humoral response	160	8	CCL22|PI3|LYZ|S100A7|S100A8|S100A9|LCN2|KRT6A	5.8e-09	2.49e-06
GO Biological Process	GO:0007275	Multicellular organism development	5023	31	TGM1|PI3|RAC2|KRT6C|KRT6B|CHI3L1|EP300|SLC9A1|CDH3|STAT3|TNC|ERBB2|EGFR|KRT16|FOS|KRT17|SPINK6|STAT1|S100A7|S100A8|S100A9|LOR|SPRR2B|SPRR2D|JUN|KRT6A|SPRR2A|CXCR4|CREB1|BRCA1|KLK13	8.15e-09	3.38e-06
GO Biological Process	GO:0048584	Positive regulation of response to stimulus	2257	21	CCL22|NFKB1|RAC2|CHI3L1|EP300|IL37|SLC9A1|CDH3|STAT3|ERBB2|EGFR|CD1A|S100A7|S100A8|S100A9|JUN|IL4R|C1S|CXCR4|BRCA1|C1R	1.31e-08	5.26e-06
GO Biological Process	GO:0002443	Leukocyte mediated immunity	641	12	NFKB1|CHI3L1|LYZ|SERPINB3|S100A7|S100A8|S100A9|LCN2|GIG25|IL4R|C1S|C1R	3.01e-08	1.17e-05
GO Biological Process	GO:0002684	Positive regulation of immune system process	949	14	NFKB1|RAC2|EP300|STAT3|CD1A|FOS|DPP4|STAT1|S100A7|JUN|IL4R|C1S|CREB1|C1R	3.23e-08	1.22e-05
GO Biological Process	GO:0051238	Sequestering of metal ion	11	4	S100A7|S100A8|S100A9|LCN2	3.87e-08	1.42e-05
GO Biological Process	GO:0032501	Multicellular organismal process	6933	35	TGM1|PI3|RAC2|KRT6C|KRT6B|CHI3L1|LYZ|EP300|SLC9A1|CDH3|STAT3|TNC|ERBB2|EGFR|KRT16|FOS|KRT17|SPINK6|DPP4|STAT1|S100A7|S100A8|S100A9|LOR|SPRR2B|SPRR2D|JUN|KRT6A|SPRR2A|GIG25|IL4R|CXCR4|CREB1|BRCA1|KLK13	5.89e-08	2.05e-05
GO Biological Process	GO:0001775	Cell activation	1075	14	NFKB1|CHI3L1|LYZ|EP300|STAT3|EGFR|SERPINB3|DPP4|S100A7|S100A8|S100A9|JUN|LCN2|GIG25	1.48e-07	5.02e-05
GO Biological Process	GO:0035994	Response to muscle stretch	18	4	NFKB1|SLC9A1|FOS|JUN	2.05e-07	6.74e-05
GO Biological Process	GO:0045321	Leukocyte activation	929	13	NFKB1|CHI3L1|LYZ|EP300|STAT3|SERPINB3|DPP4|S100A7|S100A8|S100A9|JUN|LCN2|GIG25	2.05e-07	6.74e-05
GO Biological Process	GO:0030307	Positive regulation of cell growth	171	7	SLC9A1|ERBB2|EGFR|KRT17|S100A8|S100A9|CXCR4	2.09e-07	6.74e-05
GO Biological Process	GO:0002682	Regulation of immune system process	1514	16	NFKB1|RAC2|EP300|STAT3|ERBB2|CD1A|FOS|SERPINB4|DPP4|STAT1|S100A7|JUN|IL4R|C1S|CREB1|C1R	2.56e-07	7.82e-05
GO Biological Process	GO:0045927	Positive regulation of growth	267	8	SLC9A1|ERBB2|EGFR|KRT17|S100A8|S100A9|CXCR4|CREB1	2.64e-07	7.9e-05
GO Biological Process	GO:0009617	Response to bacterium	634	11	NFKB1|PI3|LYZ|IL37|FOS|S100A7|S100A8|S100A9|JUN|LCN2|KRT6A	2.65e-07	7.9e-05
GO Biological Process	GO:0048583	Regulation of response to stimulus	4114	26	CCL22|NFKB1|RAC2|CHI3L1|EP300|IL37|SLC9A1|CDH3|STAT3|ERBB2|EGFR|SERPINB3|CD1A|FOS|SERPINB4|DPP4|STAT1|S100A7|S100A8|S100A9|JUN|IL4R|C1S|CXCR4|BRCA1|C1R	2.85e-07	8.13e-05
GO Biological Process	GO:0051240	Positive regulation of multicellular organismal process	1770	17	NFKB1|CHI3L1|EP300|SLC9A1|STAT3|EGFR|SERPINB3|FOS|KRT17|STAT1|S100A9|JUN|LCN2|IL4R|CXCR4|CREB1|BRCA1	3.66e-07	0.0001
GO Biological Process	GO:0010604	Positive regulation of macromolecule metabolic process	3600	24	CCL22|NFKB1|CHI3L1|EP300|IL37|SLC9A1|CDH3|STAT3|TNC|ERBB2|EGFR|SERPINB3|FOS|KRT17|STAT1|S100A7|S100A8|S100A9|JUN|LCN2|IL4R|CXCR4|CREB1|BRCA1	4.46e-07	0.00012
GO Biological Process	GO:0032101	Regulation of response to external stimulus	1013	13	NFKB1|RAC2|EP300|IL37|STAT3|EGFR|SERPINB4|DPP4|STAT1|S100A7|S100A8|S100A9|CXCR4	5.44e-07	0.00014
GO Biological Process	GO:0010647	Positive regulation of cell communication	1823	17	CCL22|NFKB1|RAC2|CHI3L1|EP300|IL37|SLC9A1|CDH3|STAT3|ERBB2|EGFR|S100A7|S100A8|S100A9|JUN|CXCR4|CREB1	5.55e-07	0.00014
GO Biological Process	GO:0023056	Positive regulation of signaling	1831	17	CCL22|NFKB1|RAC2|CHI3L1|EP300|IL37|SLC9A1|CDH3|STAT3|ERBB2|EGFR|S100A7|S100A8|S100A9|JUN|CXCR4|CREB1	5.9e-07	0.00015
GO Biological Process	GO:0009725	Response to hormone	849	12	NFKB1|EP300|SLC9A1|STAT3|TNC|EGFR|FOS|STAT1|JUN|IL4R|CREB1|BRCA1	5.99e-07	0.00015
GO Biological Process	GO:0033993	Response to lipid	858	12	NFKB1|IL37|STAT3|TNC|EGFR|FOS|S100A7|S100A8|JUN|LCN2|CREB1|BRCA1	6.69e-07	0.00016
GO Biological Process	GO:0045087	Innate immune response	703	11	CCL22|NFKB1|PI3|KRT16|STAT1|S100A7|S100A8|S100A9|LCN2|C1S|C1R	7.25e-07	0.00017
GO Biological Process	GO:1902533	Positive regulation of intracellular signal transduction	1041	13	CCL22|RAC2|CHI3L1|EP300|IL37|SLC9A1|ERBB2|EGFR|S100A7|S100A8|S100A9|JUN|CXCR4	7.37e-07	0.00017
GO Biological Process	GO:0009967	Positive regulation of signal transduction	1654	16	CCL22|NFKB1|RAC2|CHI3L1|EP300|IL37|SLC9A1|CDH3|STAT3|ERBB2|EGFR|S100A7|S100A8|S100A9|JUN|CXCR4	8.35e-07	0.00019
GO Biological Process	GO:0032870	Cellular response to hormone stimulus	569	10	NFKB1|SLC9A1|STAT3|TNC|EGFR|FOS|STAT1|JUN|CREB1|BRCA1	9e-07	0.0002
GO Biological Process	GO:0071310	Cellular response to organic substance	2369	19	CCL22|NFKB1|CHI3L1|EP300|IL37|SLC9A1|STAT3|TNC|ERBB2|EGFR|FOS|STAT1|CASP7|JUN|LCN2|IL4R|CXCR4|CREB1|BRCA1	9.19e-07	0.0002
GO Biological Process	GO:0048518	Positive regulation of biological process	6112	31	TGM1|CCL22|NFKB1|RAC2|CHI3L1|EP300|IL37|SLC9A1|CDH3|STAT3|TNC|ERBB2|EGFR|SERPINB3|CD1A|FOS|KRT17|DPP4|STAT1|S100A7|S100A8|S100A9|JUN|LCN2|KRT6A|IL4R|C1S|CXCR4|CREB1|BRCA1|C1R	1.08e-06	0.00023
GO Biological Process	GO:0070887	Cellular response to chemical stimulus	2919	21	CCL22|NFKB1|CHI3L1|EP300|IL37|SLC9A1|STAT3|TNC|ERBB2|EGFR|FOS|STAT1|S100A8|S100A9|CASP7|JUN|LCN2|IL4R|CXCR4|CREB1|BRCA1	1.1e-06	0.00023
GO Biological Process	GO:0002274	Myeloid leukocyte activation	585	10	NFKB1|CHI3L1|LYZ|SERPINB3|S100A7|S100A8|S100A9|JUN|LCN2|GIG25	1.15e-06	0.00024
GO Biological Process	GO:0008284	Positive regulation of cell population proliferation	919	12	TGM1|RAC2|CDH3|STAT3|TNC|ERBB2|EGFR|SERPINB3|DPP4|STAT1|JUN|KRT6A	1.37e-06	0.00028
GO Biological Process	GO:0034097	Response to cytokine	1101	13	CCL22|NFKB1|CHI3L1|IL37|STAT3|FOS|STAT1|JUN|LCN2|IL4R|CXCR4|CREB1|BRCA1	1.37e-06	0.00028
GO Biological Process	GO:0032268	Regulation of cellular protein metabolic process	2693	20	CCL22|NFKB1|PI3|RAC2|CHI3L1|EP300|STAT3|ERBB2|EGFR|SERPINB3|KRT17|SPINK6|SERPINB4|S100A7|S100A8|S100A9|JUN|GIG25|CXCR4|BRCA1	1.39e-06	0.00028
GO Biological Process	GO:0010033	Response to organic substance	3011	21	CCL22|NFKB1|CHI3L1|EP300|IL37|SLC9A1|STAT3|TNC|ERBB2|EGFR|FOS|STAT1|S100A7|S100A8|CASP7|JUN|LCN2|IL4R|CXCR4|CREB1|BRCA1	1.83e-06	0.00036
GO Biological Process	GO:0002366	Leukocyte activation involved in immune response	626	10	NFKB1|CHI3L1|LYZ|STAT3|SERPINB3|S100A7|S100A8|S100A9|LCN2|GIG25	2.1e-06	0.0004
GO Biological Process	GO:0009628	Response to abiotic stimulus	1147	13	NFKB1|CHI3L1|EP300|SLC9A1|TNC|EGFR|FOS|DPP4|STAT1|JUN|CXCR4|CREB1|BRCA1	2.16e-06	0.00041
GO Biological Process	GO:0043312	Neutrophil degranulation	484	9	NFKB1|CHI3L1|LYZ|SERPINB3|S100A7|S100A8|S100A9|LCN2|GIG25	2.17e-06	0.00041
GO Biological Process	GO:0048522	Positive regulation of cellular process	5579	29	TGM1|CCL22|NFKB1|RAC2|CHI3L1|EP300|IL37|SLC9A1|CDH3|STAT3|TNC|ERBB2|EGFR|SERPINB3|CD1A|FOS|KRT17|DPP4|STAT1|S100A7|S100A8|S100A9|JUN|LCN2|KRT6A|IL4R|CXCR4|CREB1|BRCA1	2.3e-06	0.00042
GO Biological Process	GO:1902531	Regulation of intracellular signal transduction	1807	16	CCL22|RAC2|CHI3L1|EP300|IL37|SLC9A1|ERBB2|EGFR|SERPINB3|STAT1|S100A7|S100A8|S100A9|JUN|CXCR4|BRCA1	2.67e-06	0.00046
GO Biological Process	GO:0070741	Response to interleukin-6	37	4	NFKB1|CHI3L1|STAT3|STAT1	2.75e-06	0.00046
GO Biological Process	GO:0051094	Positive regulation of developmental process	1389	14	NFKB1|CHI3L1|EP300|STAT3|SERPINB3|FOS|KRT17|STAT1|S100A9|JUN|IL4R|CXCR4|CREB1|BRCA1	3.12e-06	0.0005
GO Biological Process	GO:0032103	Positive regulation of response to external stimulus	511	9	NFKB1|RAC2|EP300|STAT3|EGFR|S100A7|S100A8|S100A9|CXCR4	3.36e-06	0.00053
GO Biological Process	GO:0042221	Response to chemical	4333	25	CCL22|NFKB1|RAC2|CHI3L1|EP300|IL37|SLC9A1|CDH3|STAT3|TNC|ERBB2|EGFR|FOS|DPP4|STAT1|S100A7|S100A8|S100A9|CASP7|JUN|LCN2|IL4R|CXCR4|CREB1|BRCA1	3.49e-06	0.00055
GO Biological Process	GO:0071345	Cellular response to cytokine stimulus	1013	12	CCL22|NFKB1|CHI3L1|IL37|STAT3|FOS|STAT1|LCN2|IL4R|CXCR4|CREB1|BRCA1	3.72e-06	0.00057
GO Biological Process	GO:0050896	Response to stimulus	8046	35	CCL22|NFKB1|PI3|RAC2|CHI3L1|LYZ|EP300|IL37|SLC9A1|CDH3|STAT3|TNC|ERBB2|EGFR|SERPINB3|CD1A|KRT16|FOS|DPP4|STAT1|S100A7|S100A8|S100A9|CASP7|JUN|LCN2|KRT6A|GIG25|IL4R|C1S|CD207|CXCR4|CREB1|BRCA1|C1R	3.74e-06	0.00057
GO Biological Process	GO:0042127	Regulation of cell population proliferation	1642	15	TGM1|RAC2|CDH3|STAT3|TNC|ERBB2|EGFR|SERPINB3|DPP4|STAT1|JUN|KRT6A|IL4R|CREB1|BRCA1	4.18e-06	0.00062
GO Biological Process	GO:0042742	Defense response to bacterium	277	7	PI3|LYZ|S100A7|S100A8|S100A9|LCN2|KRT6A	4.75e-06	0.00069
GO Biological Process	GO:0045639	Positive regulation of myeloid cell differentiation	99	5	STAT3|FOS|STAT1|JUN|CREB1	4.89e-06	0.00071
GO Biological Process	GO:0009719	Response to endogenous stimulus	1447	14	NFKB1|EP300|SLC9A1|STAT3|TNC|ERBB2|EGFR|FOS|STAT1|CASP7|JUN|IL4R|CREB1|BRCA1	5.01e-06	0.00072
GO Biological Process	GO:1901701	Cellular response to oxygen-containing compound	1055	12	NFKB1|IL37|SLC9A1|STAT3|TNC|EGFR|FOS|STAT1|JUN|LCN2|CREB1|BRCA1	5.61e-06	0.00079
GO Biological Process	GO:0070486	Leukocyte aggregation	12	3	RAC2|S100A8|S100A9	5.75e-06	0.0008
GO Biological Process	GO:0042330	Taxis	547	9	CCL22|RAC2|EP300|ERBB2|DPP4|S100A8|S100A9|CXCR4|CREB1	5.78e-06	0.0008
GO Biological Process	GO:0052548	Regulation of endopeptidase activity	418	8	PI3|STAT3|SERPINB3|SPINK6|SERPINB4|S100A8|S100A9|GIG25	6.94e-06	0.00095
GO Biological Process	GO:0050776	Regulation of immune response	896	11	NFKB1|RAC2|EP300|CD1A|FOS|SERPINB4|STAT1|JUN|IL4R|C1S|C1R	7.34e-06	0.00099
GO Biological Process	GO:0050679	Positive regulation of epithelial cell proliferation	192	6	TGM1|CDH3|STAT3|ERBB2|EGFR|JUN	7.47e-06	0.001
GO Biological Process	GO:0014070	Response to organic cyclic compound	911	11	NFKB1|SLC9A1|STAT3|TNC|EGFR|FOS|STAT1|CASP7|JUN|CXCR4|BRCA1	8.57e-06	0.0011
GO Biological Process	GO:0000302	Response to reactive oxygen species	198	6	EGFR|FOS|STAT1|S100A7|JUN|LCN2	8.85e-06	0.0012
GO Biological Process	GO:1903708	Positive regulation of hemopoiesis	199	6	STAT3|FOS|STAT1|JUN|IL4R|CREB1	9.11e-06	0.0012
GO Biological Process	GO:0071496	Cellular response to external stimulus	309	7	NFKB1|SLC9A1|TNC|EGFR|FOS|JUN|LCN2	9.54e-06	0.0012
GO Biological Process	GO:0032496	Response to lipopolysaccharide	313	7	NFKB1|IL37|FOS|S100A7|S100A8|JUN|LCN2	1.04e-05	0.0013
GO Biological Process	GO:1901700	Response to oxygen-containing compound	1567	14	NFKB1|IL37|SLC9A1|STAT3|TNC|EGFR|FOS|STAT1|S100A7|S100A8|JUN|LCN2|CREB1|BRCA1	1.24e-05	0.0016
GO Biological Process	GO:0010628	Positive regulation of gene expression	2337	17	NFKB1|EP300|IL37|SLC9A1|CDH3|STAT3|TNC|ERBB2|EGFR|FOS|KRT17|STAT1|JUN|LCN2|IL4R|CREB1|BRCA1	1.64e-05	0.002
GO Biological Process	GO:0050678	Regulation of epithelial cell proliferation	339	7	TGM1|CDH3|STAT3|ERBB2|EGFR|STAT1|JUN	1.72e-05	0.0021
GO Biological Process	GO:0071495	Cellular response to endogenous stimulus	1181	12	NFKB1|SLC9A1|STAT3|TNC|ERBB2|EGFR|FOS|STAT1|CASP7|JUN|CREB1|BRCA1	1.74e-05	0.0021
GO Biological Process	GO:2000026	Regulation of multicellular organismal development	2096	16	CHI3L1|EP300|CDH3|STAT3|ERBB2|EGFR|SERPINB3|FOS|KRT17|STAT1|S100A9|JUN|IL4R|CXCR4|CREB1|BRCA1	1.78e-05	0.0021
GO Biological Process	GO:0010243	Response to organonitrogen compound	987	11	NFKB1|SLC9A1|STAT3|EGFR|FOS|STAT1|CASP7|JUN|CXCR4|CREB1|BRCA1	1.8e-05	0.0021
GO Biological Process	GO:0045597	Positive regulation of cell differentiation	993	11	NFKB1|EP300|STAT3|SERPINB3|FOS|STAT1|S100A9|JUN|IL4R|CXCR4|CREB1	1.91e-05	0.0022
GO Biological Process	GO:0050793	Regulation of developmental process	2648	18	NFKB1|RAC2|CHI3L1|EP300|CDH3|STAT3|ERBB2|EGFR|SERPINB3|FOS|KRT17|STAT1|S100A9|JUN|IL4R|CXCR4|CREB1|BRCA1	2.11e-05	0.0024
GO Biological Process	GO:0050790	Regulation of catalytic activity	2386	17	CCL22|NFKB1|PI3|RAC2|CHI3L1|CDH3|STAT3|ERBB2|EGFR|SERPINB3|SPINK6|SERPINB4|S100A8|S100A9|JUN|GIG25|CXCR4	2.16e-05	0.0025
GO Biological Process	GO:0010646	Regulation of cell communication	3514	21	CCL22|NFKB1|RAC2|CHI3L1|EP300|IL37|SLC9A1|CDH3|STAT3|ERBB2|EGFR|SERPINB3|DPP4|STAT1|S100A7|S100A8|S100A9|JUN|CXCR4|CREB1|BRCA1	2.2e-05	0.0025
GO Biological Process	GO:1903706	Regulation of hemopoiesis	493	8	EP300|STAT3|ERBB2|FOS|STAT1|JUN|IL4R|CREB1	2.24e-05	0.0025
GO Biological Process	GO:0051239	Regulation of multicellular organismal process	3227	20	NFKB1|CHI3L1|EP300|IL37|SLC9A1|CDH3|STAT3|ERBB2|EGFR|SERPINB3|FOS|KRT17|STAT1|S100A9|JUN|LCN2|IL4R|CXCR4|CREB1|BRCA1	2.28e-05	0.0026
GO Biological Process	GO:0023051	Regulation of signaling	3553	21	CCL22|NFKB1|RAC2|CHI3L1|EP300|IL37|SLC9A1|CDH3|STAT3|ERBB2|EGFR|SERPINB3|DPP4|STAT1|S100A7|S100A8|S100A9|JUN|CXCR4|CREB1|BRCA1	2.62e-05	0.0029
GO Biological Process	GO:0071356	Cellular response to tumor necrosis factor	245	6	CCL22|NFKB1|CHI3L1|STAT1|LCN2|BRCA1	2.86e-05	0.0031
GO Biological Process	GO:0031347	Regulation of defense response	674	9	NFKB1|EP300|IL37|STAT3|EGFR|SERPINB4|STAT1|S100A8|S100A9	2.97e-05	0.0032
GO Biological Process	GO:0040008	Regulation of growth	676	9	SLC9A1|STAT3|ERBB2|EGFR|KRT17|S100A8|S100A9|CXCR4|CREB1	3.04e-05	0.0033
GO Biological Process	GO:0040011	Locomotion	1251	12	CCL22|RAC2|EP300|SLC9A1|ERBB2|EGFR|KRT16|DPP4|S100A8|S100A9|CXCR4|CREB1	3.06e-05	0.0033
GO Biological Process	GO:0019221	Cytokine-mediated signaling pathway	678	9	CCL22|NFKB1|IL37|STAT3|FOS|STAT1|LCN2|IL4R|CXCR4	3.11e-05	0.0033
GO Biological Process	GO:0070488	Neutrophil aggregation	2	2	S100A8|S100A9	3.36e-05	0.0035
GO Biological Process	GO:0044403	Symbiotic process	865	10	EP300|STAT3|EGFR|SERPINB3|DPP4|STAT1|JUN|KRT6A|CXCR4|CREB1	3.42e-05	0.0036
GO Biological Process	GO:0065009	Regulation of molecular function	4913	25	CCL22|NFKB1|PI3|RAC2|CHI3L1|EP300|IL37|SLC9A1|CDH3|STAT3|ERBB2|EGFR|SERPINB3|FOS|SPINK6|SERPINB4|DPP4|STAT1|S100A8|S100A9|JUN|GIG25|CXCR4|CREB1|BRCA1	3.6e-05	0.0037
GO Biological Process	GO:0051336	Regulation of hydrolase activity	1284	12	CCL22|PI3|STAT3|ERBB2|EGFR|SERPINB3|SPINK6|SERPINB4|S100A8|S100A9|JUN|GIG25	3.95e-05	0.004
GO Biological Process	GO:0045637	Regulation of myeloid cell differentiation	260	6	EP300|STAT3|FOS|STAT1|JUN|CREB1	3.96e-05	0.004
GO Biological Process	GO:0071407	Cellular response to organic cyclic compound	537	8	NFKB1|SLC9A1|STAT3|TNC|EGFR|STAT1|CASP7|BRCA1	4.09e-05	0.0041
GO Biological Process	GO:0060255	Regulation of macromolecule metabolic process	6407	29	CCL22|NFKB1|PI3|RAC2|CHI3L1|EP300|IL37|SLC9A1|CDH3|STAT3|TNC|ERBB2|EGFR|SERPINB3|FOS|KRT17|SPINK6|SERPINB4|STAT1|S100A7|S100A8|S100A9|JUN|LCN2|GIG25|IL4R|CXCR4|CREB1|BRCA1	4.49e-05	0.0044
GO Biological Process	GO:0006935	Chemotaxis	545	8	CCL22|RAC2|ERBB2|DPP4|S100A8|S100A9|CXCR4|CREB1	4.53e-05	0.0044
GO Biological Process	GO:0009966	Regulation of signal transduction	3107	19	CCL22|NFKB1|RAC2|CHI3L1|EP300|IL37|SLC9A1|CDH3|STAT3|ERBB2|EGFR|SERPINB3|STAT1|S100A7|S100A8|S100A9|JUN|CXCR4|BRCA1	4.99e-05	0.0048
GO Biological Process	GO:0031325	Positive regulation of cellular metabolic process	3413	20	CCL22|NFKB1|CHI3L1|EP300|SLC9A1|CDH3|STAT3|ERBB2|EGFR|SERPINB3|FOS|KRT17|STAT1|S100A7|S100A8|S100A9|JUN|CXCR4|CREB1|BRCA1	5.24e-05	0.005
GO Biological Process	GO:0006915	Apoptotic process	918	10	NFKB1|CHI3L1|EP300|S100A8|S100A9|CASP7|JUN|LCN2|CXCR4|BRCA1	5.62e-05	0.0053
GO Biological Process	GO:0030324	Lung development	170	5	CHI3L1|EP300|TNC|EGFR|CREB1	6.05e-05	0.0057
GO Biological Process	GO:2000145	Regulation of cell motility	929	10	RAC2|STAT3|ERBB2|EGFR|SERPINB3|KRT16|DPP4|S100A7|JUN|CXCR4	6.2e-05	0.0058
GO Biological Process	GO:0001817	Regulation of cytokine production	742	9	NFKB1|EP300|IL37|CDH3|STAT3|STAT1|IL4R|CREB1|BRCA1	6.22e-05	0.0058
GO Biological Process	GO:0002697	Regulation of immune effector process	418	7	RAC2|CD1A|SERPINB4|STAT1|IL4R|C1S|C1R	6.35e-05	0.0059
GO Biological Process	GO:0070372	Regulation of ERK1 and ERK2 cascade	292	6	CCL22|CHI3L1|ERBB2|EGFR|S100A7|JUN	7.44e-05	0.0067
GO Biological Process	GO:0044093	Positive regulation of molecular function	1842	14	CCL22|NFKB1|CHI3L1|EP300|SLC9A1|CDH3|STAT3|ERBB2|EGFR|SERPINB3|S100A8|S100A9|JUN|CXCR4	7.46e-05	0.0067
GO Biological Process	GO:0071417	Cellular response to organonitrogen compound	590	8	NFKB1|SLC9A1|STAT3|EGFR|STAT1|CASP7|CREB1|BRCA1	7.84e-05	0.007
GO Biological Process	GO:0042633	Hair cycle	91	4	CDH3|EGFR|KRT16|KRT17	7.85e-05	0.007
GO Biological Process	GO:0051090	Regulation of DNA-binding transcription factor activity	437	7	NFKB1|EP300|STAT3|FOS|S100A8|S100A9|JUN	8.36e-05	0.0073
GO Biological Process	GO:0032119	Sequestering of zinc ion	4	2	S100A8|S100A9	8.38e-05	0.0073
GO Biological Process	GO:0071354	Cellular response to interleukin-6	33	3	NFKB1|STAT3|STAT1	8.71e-05	0.0075
GO Biological Process	GO:0051173	Positive regulation of nitrogen compound metabolic process	3239	19	CCL22|NFKB1|CHI3L1|EP300|SLC9A1|STAT3|ERBB2|EGFR|SERPINB3|FOS|KRT17|STAT1|S100A7|S100A8|S100A9|JUN|CXCR4|CREB1|BRCA1	8.91e-05	0.0076
GO Biological Process	GO:0045765	Regulation of angiogenesis	303	6	CHI3L1|STAT3|ERBB2|STAT1|CXCR4|BRCA1	9.08e-05	0.0077
GO Biological Process	GO:0032270	Positive regulation of cellular protein metabolic process	1635	13	CCL22|CHI3L1|STAT3|ERBB2|EGFR|SERPINB3|KRT17|S100A7|S100A8|S100A9|JUN|CXCR4|BRCA1	9.23e-05	0.0077
GO Biological Process	GO:0018149	Peptide cross-linking	34	3	TGM1|PI3|LOR	9.46e-05	0.0078
GO Biological Process	GO:0001819	Positive regulation of cytokine production	461	7	NFKB1|EP300|STAT3|STAT1|IL4R|CREB1|BRCA1	0.00012	0.0095
GO Biological Process	GO:0080134	Regulation of response to stress	1437	12	NFKB1|EP300|IL37|STAT3|EGFR|SERPINB3|SERPINB4|STAT1|S100A8|S100A9|CXCR4|BRCA1	0.00012	0.0095
GO Biological Process	GO:0042592	Homeostatic process	1676	13	RAC2|LYZ|SLC9A1|CDH3|STAT3|EGFR|KRT16|STAT1|S100A8|S100A9|LCN2|GIG25|CXCR4	0.00012	0.0096
GO Biological Process	GO:0071276	Cellular response to cadmium ion	37	3	EGFR|FOS|JUN	0.00012	0.0096
GO Biological Process	GO:0062014	Negative regulation of small molecule metabolic process	104	4	NFKB1|EP300|STAT3|BRCA1	0.00013	0.0101
GO Biological Process	GO:0140352	Export from cell	1028	10	NFKB1|CHI3L1|LYZ|SLC9A1|SERPINB3|S100A7|S100A8|S100A9|LCN2|GIG25	0.00014	0.0111
GO Biological Process	GO:1902895	Positive regulation of pri-miRNA transcription by RNA polymerase II	40	3	STAT3|FOS|JUN	0.00015	0.0114
GO Biological Process	GO:0018119	Peptidyl-cysteine S-nitrosylation	6	2	S100A8|S100A9	0.00016	0.0118
GO Biological Process	GO:0070374	Positive regulation of ERK1 and ERK2 cascade	209	5	CCL22|CHI3L1|EGFR|S100A7|JUN	0.00016	0.0118
GO Biological Process	GO:0035295	Tube development	851	9	CHI3L1|EP300|TNC|EGFR|STAT1|S100A7|JUN|CXCR4|CREB1	0.00017	0.0129
GO Biological Process	GO:0061844	Antimicrobial humoral immune response mediated by antimicrobial peptide	113	4	CCL22|S100A7|S100A9|KRT6A	0.00018	0.0129
GO Biological Process	GO:0030334	Regulation of cell migration	865	9	RAC2|STAT3|EGFR|SERPINB3|KRT16|DPP4|S100A7|JUN|CXCR4	0.0002	0.0144
GO Biological Process	GO:0010742	Macrophage derived foam cell differentiation	7	2	EP300|STAT1	0.0002	0.0145
GO Biological Process	GO:0035425	Autocrine signaling	7	2	SERPINB3|S100A8	0.0002	0.0145
GO Biological Process	GO:0048871	Multicellular organismal homeostasis	352	6	RAC2|LYZ|CDH3|STAT3|KRT16|GIG25	0.0002	0.0145
GO Biological Process	GO:0050727	Regulation of inflammatory response	351	6	NFKB1|IL37|STAT3|EGFR|S100A8|S100A9	0.0002	0.0145
GO Biological Process	GO:0007166	Cell surface receptor signaling pathway	2325	15	CCL22|NFKB1|EP300|IL37|CDH3|STAT3|ERBB2|EGFR|FOS|STAT1|JUN|LCN2|IL4R|CXCR4|CREB1	0.00024	0.0168
GO Biological Process	GO:0043903	Regulation of symbiotic process	230	5	EP300|STAT1|JUN|KRT6A|CXCR4	0.00024	0.0168
GO Biological Process	GO:0046903	Secretion	1097	10	NFKB1|CHI3L1|LYZ|SERPINB3|S100A7|S100A8|S100A9|LCN2|GIG25|CREB1	0.00024	0.0168
GO Biological Process	GO:0051248	Negative regulation of protein metabolic process	1096	10	NFKB1|PI3|STAT3|EGFR|SERPINB3|SPINK6|SERPINB4|JUN|GIG25|BRCA1	0.00024	0.0168
GO Biological Process	GO:0030335	Positive regulation of cell migration	522	7	RAC2|STAT3|EGFR|SERPINB3|S100A7|JUN|CXCR4	0.00025	0.0169
GO Biological Process	GO:0031349	Positive regulation of defense response	367	6	NFKB1|EP300|STAT3|EGFR|S100A8|S100A9	0.00025	0.0171
GO Biological Process	GO:0038114	interleukin-21-mediated signaling pathway	8	2	STAT3|STAT1	0.00025	0.0171
GO Biological Process	GO:0097305	Response to alcohol	233	5	STAT3|TNC|FOS|S100A8|BRCA1	0.00026	0.0171
GO Biological Process	GO:0045104	Intermediate filament cytoskeleton organization	49	3	KRT6C|KRT16|KRT17	0.00026	0.0175
GO Biological Process	GO:0071396	Cellular response to lipid	528	7	NFKB1|IL37|TNC|EGFR|LCN2|CREB1|BRCA1	0.00026	0.0175
GO Biological Process	GO:0009611	Response to wounding	532	7	CDH3|TNC|ERBB2|EGFR|S100A8|JUN|KRT6A	0.00028	0.0182
GO Biological Process	GO:0071622	Regulation of granulocyte chemotaxis	51	3	RAC2|DPP4|S100A7	0.00029	0.0192
GO Biological Process	GO:0010035	Response to inorganic substance	538	7	EGFR|FOS|STAT1|S100A8|JUN|LCN2|CREB1	0.0003	0.0192
GO Biological Process	GO:0038113	interleukin-9-mediated signaling pathway	9	2	STAT3|STAT1	0.0003	0.0197
GO Biological Process	GO:0043410	Positive regulation of MAPK cascade	543	7	CCL22|CHI3L1|ERBB2|EGFR|S100A7|JUN|CXCR4	0.00031	0.0198
GO Biological Process	GO:0043408	Regulation of MAPK cascade	725	8	CCL22|CHI3L1|ERBB2|EGFR|SERPINB3|S100A7|JUN|CXCR4	0.00032	0.02
GO Biological Process	GO:0034614	Cellular response to reactive oxygen species	133	4	EGFR|FOS|JUN|LCN2	0.00032	0.0203
GO Biological Process	GO:0023052	Signaling	5239	24	CCL22|NFKB1|RAC2|CHI3L1|EP300|IL37|SLC9A1|CDH3|STAT3|TNC|ERBB2|EGFR|SERPINB3|FOS|DPP4|STAT1|S100A8|S100A9|JUN|LCN2|IL4R|CXCR4|CREB1|BRCA1	0.00035	0.0215
GO Biological Process	GO:0045595	Regulation of cell differentiation	1874	13	NFKB1|EP300|STAT3|ERBB2|EGFR|SERPINB3|FOS|STAT1|S100A9|JUN|IL4R|CXCR4|CREB1	0.00036	0.0221
GO Biological Process	GO:0048708	Astrocyte differentiation	55	3	STAT3|EGFR|S100A8	0.00036	0.0223
GO Biological Process	GO:0032602	Chemokine production	10	2	S100A8|S100A9	0.00037	0.0223
GO Biological Process	GO:0032768	Regulation of monooxygenase activity	57	3	NFKB1|CDH3|EGFR	0.0004	0.0236
GO Biological Process	GO:0007611	Learning or memory	259	5	EP300|EGFR|FOS|JUN|CREB1	0.00041	0.024
GO Biological Process	GO:0007623	Circadian rhythm	142	4	EP300|EGFR|JUN|CREB1	0.00041	0.024
GO Biological Process	GO:0009653	Anatomical structure morphogenesis	2165	14	RAC2|EP300|CDH3|STAT3|TNC|ERBB2|EGFR|KRT16|KRT17|S100A7|JUN|KRT6A|CXCR4|CREB1	0.00041	0.024
GO Biological Process	GO:0030595	Leukocyte chemotaxis	142	4	CCL22|S100A8|S100A9|CXCR4	0.00041	0.024
GO Biological Process	GO:0002763	Positive regulation of myeloid leukocyte differentiation	58	3	FOS|JUN|CREB1	0.00042	0.0243
GO Biological Process	GO:0007610	Behavior	572	7	EP300|STAT3|EGFR|FOS|DPP4|JUN|CREB1	0.00043	0.0244
GO Biological Process	GO:0050729	Positive regulation of inflammatory response	144	4	STAT3|EGFR|S100A8|S100A9	0.00043	0.0246
GO Biological Process	GO:0070106	interleukin-27-mediated signaling pathway	11	2	STAT3|STAT1	0.00043	0.0246
GO Biological Process	GO:0070757	interleukin-35-mediated signaling pathway	11	2	STAT3|STAT1	0.00043	0.0246
GO Biological Process	GO:0032879	Regulation of localization	2740	16	NFKB1|RAC2|SLC9A1|CDH3|STAT3|ERBB2|EGFR|SERPINB3|KRT16|DPP4|S100A7|S100A8|JUN|IL4R|CXCR4|CREB1	0.00044	0.0247
GO Biological Process	GO:0007154	Cell communication	5320	24	CCL22|NFKB1|RAC2|CHI3L1|EP300|IL37|SLC9A1|CDH3|STAT3|TNC|ERBB2|EGFR|SERPINB3|FOS|DPP4|STAT1|S100A8|S100A9|JUN|LCN2|IL4R|CXCR4|CREB1|BRCA1	0.00044	0.0248
GO Biological Process	GO:0002460	Adaptive immune response based on somatic recombination of immune receptors built from immunoglobulin superfamily domains	148	4	STAT3|IL4R|C1S|C1R	0.00048	0.0267
GO Biological Process	GO:0051345	Positive regulation of hydrolase activity	772	8	CCL22|STAT3|ERBB2|EGFR|SERPINB3|S100A8|S100A9|JUN	0.00048	0.0267
GO Biological Process	GO:0071375	Cellular response to peptide hormone stimulus	269	5	NFKB1|SLC9A1|STAT3|STAT1|CREB1	0.00049	0.0269
GO Biological Process	GO:0016032	Viral process	776	8	EP300|STAT3|EGFR|SERPINB3|DPP4|STAT1|CXCR4|CREB1	0.0005	0.0272
GO Biological Process	GO:0051091	Positive regulation of DNA-binding transcription factor activity	271	5	NFKB1|EP300|STAT3|S100A8|S100A9	0.0005	0.0275
GO Biological Process	GO:0061564	Axon development	421	6	RAC2|TNC|ERBB2|JUN|CXCR4|CREB1	0.00052	0.0281
GO Biological Process	GO:0007568	Aging	274	5	STAT3|KRT16|FOS|JUN|CREB1	0.00053	0.0286
GO Biological Process	GO:0010941	Regulation of cell death	1696	12	NFKB1|SLC9A1|STAT3|EGFR|FOS|STAT1|S100A8|S100A9|JUN|CXCR4|CREB1|BRCA1	0.00054	0.0287
GO Biological Process	GO:0065008	Regulation of biological quality	4042	20	NFKB1|RAC2|LYZ|EP300|SLC9A1|CDH3|STAT3|EGFR|KRT16|DPP4|STAT1|S100A7|S100A8|S100A9|JUN|LCN2|GIG25|IL4R|CXCR4|CREB1	0.00057	0.0304
GO Biological Process	GO:0010838	Positive regulation of keratinocyte proliferation	13	2	TGM1|CDH3	0.00058	0.0307
GO Biological Process	GO:0061029	Eyelid development in camera-type eye	13	2	EGFR|JUN	0.00058	0.0307
GO Biological Process	GO:1902107	Positive regulation of leukocyte differentiation	156	4	FOS|JUN|IL4R|CREB1	0.00058	0.0307
GO Biological Process	GO:0009314	Response to radiation	431	6	EP300|EGFR|FOS|JUN|CREB1|BRCA1	0.00059	0.0307
GO Biological Process	GO:0051092	Positive regulation of NF-kappaB transcription factor activity	158	4	NFKB1|STAT3|S100A8|S100A9	0.00061	0.0317
GO Biological Process	GO:0002009	Morphogenesis of an epithelium	435	6	TNC|EGFR|KRT16|KRT17|KRT6A|CXCR4	0.00061	0.032
GO Biological Process	GO:1902105	Regulation of leukocyte differentiation	285	5	ERBB2|FOS|JUN|IL4R|CREB1	0.00063	0.0326
GO Biological Process	GO:0042060	Wound healing	439	6	CDH3|TNC|ERBB2|EGFR|S100A8|KRT6A	0.00064	0.0332
GO Biological Process	GO:0043085	Positive regulation of catalytic activity	1489	11	CCL22|CHI3L1|CDH3|STAT3|ERBB2|EGFR|SERPINB3|S100A8|S100A9|JUN|CXCR4	0.00067	0.0344
GO Biological Process	GO:0031328	Positive regulation of cellular biosynthetic process	2005	13	NFKB1|EP300|SLC9A1|CDH3|STAT3|ERBB2|EGFR|FOS|KRT17|STAT1|JUN|CREB1|BRCA1	0.00068	0.0349
GO Biological Process	GO:0045944	Positive regulation of transcription by RNA polymerase II	1253	10	NFKB1|EP300|SLC9A1|STAT3|EGFR|FOS|STAT1|JUN|CREB1|BRCA1	0.00068	0.0349
GO Biological Process	GO:0009615	Response to virus	293	5	CCL22|STAT1|LCN2|CD207|CXCR4	0.00071	0.036
GO Biological Process	GO:0032269	Negative regulation of cellular protein metabolic process	1043	9	NFKB1|PI3|STAT3|SERPINB3|SPINK6|SERPINB4|JUN|GIG25|BRCA1	0.00076	0.0385
GO Biological Process	GO:0045766	Positive regulation of angiogenesis	169	4	CHI3L1|STAT3|CXCR4|BRCA1	0.00078	0.0389
GO Biological Process	GO:0051897	Positive regulation of protein kinase B signaling	170	4	RAC2|CHI3L1|ERBB2|EGFR	0.00079	0.0396
GO Biological Process	GO:0002526	Acute inflammatory response	74	3	STAT3|S100A8|GIG25	0.00083	0.0412
GO Biological Process	GO:0030593	Neutrophil chemotaxis	74	3	CCL22|S100A8|S100A9	0.00083	0.0412
GO Biological Process	GO:0043627	Response to estrogen	74	3	EP300|IL4R|BRCA1	0.00083	0.0412
GO Biological Process	GO:0070102	interleukin-6-mediated signaling pathway	16	2	STAT3|STAT1	0.00084	0.0412
GO Biological Process	GO:0071347	Cellular response to interleukin-1	174	4	CCL22|NFKB1|CHI3L1|LCN2	0.00086	0.042
GO Biological Process	GO:0010950	Positive regulation of endopeptidase activity	176	4	STAT3|SERPINB3|S100A8|S100A9	0.0009	0.0436
GO Biological Process	GO:0022405	Hair cycle process	77	3	CDH3|EGFR|KRT17	0.00093	0.045
GO Biological Process	GO:0010001	Glial cell differentiation	178	4	STAT3|ERBB2|EGFR|S100A8	0.00094	0.045
GO Biological Process	GO:0043923	Positive regulation by host of viral transcription	17	2	EP300|JUN	0.00094	0.045
GO Biological Process	GO:0007165	Signal transduction	4876	22	CCL22|NFKB1|RAC2|CHI3L1|EP300|IL37|SLC9A1|CDH3|STAT3|ERBB2|EGFR|FOS|DPP4|STAT1|S100A8|S100A9|JUN|LCN2|IL4R|CXCR4|CREB1|BRCA1	0.00095	0.045
GO Biological Process	GO:0071260	Cellular response to mechanical stimulus	79	3	NFKB1|SLC9A1|EGFR	0.001	0.0474
GO Biological Process	GO:0002250	Adaptive immune response	317	5	STAT3|CD1A|IL4R|C1S|C1R	0.001	0.0476
GO Biological Process	GO:0002523	Leukocyte migration involved in inflammatory response	18	2	S100A8|S100A9	0.001	0.0488
GO Biological Process	GO:0007221	Positive regulation of transcription of Notch receptor target	18	2	EP300|STAT1	0.001	0.0488
GO Biological Process	GO:0032481	Positive regulation of type I interferon production	80	3	NFKB1|EP300|STAT1	0.001	0.0488
GO Biological Process	GO:0009991	Response to extracellular stimulus	483	6	TNC|EGFR|FOS|STAT1|JUN|LCN2	0.0011	0.0489
GO Cellular Component	GO:0005615	Extracellular space	3195	28	TGM1|CCL22|PI3|RAC2|KRT6C|KRT6B|CHI3L1|LYZ|IL37|SLC9A1|TNC|EGFR|SERPINB3|CD1A|KRT16|SERPINB4|DPP4|S100A7|S100A8|S100A9|LCN2|KRT6A|GIG25|IL4R|C1S|CXCR4|C1R|KLK13	2.69e-11	4.56e-08
GO Cellular Component	GO:0005576	Extracellular region	4166	30	TGM1|CCL22|NFKB1|PI3|RAC2|KRT6C|KRT6B|CHI3L1|LYZ|IL37|SLC9A1|TNC|EGFR|SERPINB3|CD1A|KRT16|SPINK6|SERPINB4|DPP4|S100A7|S100A8|S100A9|LCN2|KRT6A|GIG25|IL4R|C1S|CXCR4|C1R|KLK13	4.1e-10	3.49e-07
GO Cellular Component	GO:0001533	Cornified envelope	45	6	TGM1|PI3|LOR|SPRR2B|SPRR2D|SPRR2A	2.26e-09	1.28e-06
GO Cellular Component	GO:0031983	Vesicle lumen	330	10	NFKB1|CHI3L1|LYZ|EGFR|SERPINB3|S100A7|S100A8|S100A9|LCN2|GIG25	6.3e-09	2.67e-06
GO Cellular Component	GO:0034774	Secretory granule lumen	324	9	NFKB1|CHI3L1|LYZ|SERPINB3|S100A7|S100A8|S100A9|LCN2|GIG25	8.13e-08	2.76e-05
GO Cellular Component	GO:0031982	Vesicle	3879	24	TGM1|NFKB1|RAC2|KRT6C|KRT6B|CHI3L1|LYZ|SLC9A1|ERBB2|EGFR|SERPINB3|CD1A|KRT16|DPP4|S100A7|S100A8|S100A9|LCN2|KRT6A|GIG25|CD207|CXCR4|C1R|KLK13	1.82e-06	0.00044
GO Cellular Component	GO:0005737	Cytoplasm	11428	42	TGM1|NFKB1|PI3|RAC2|KRT6C|KRT6B|CHI3L1|LYZ|EP300|IL37|SLC9A1|CDH3|STAT3|TNC|ERBB2|EGFR|SERPINB3|CD1A|KRT16|FOS|KRT17|SERPINB4|DPP4|STAT1|S100A7|S100A7A|S100A8|S100A9|LOR|SPRR2B|SPRR2D|CASP7|JUN|LCN2|KRT6A|SPRR2A|GIG25|CD207|CXCR4|CREB1|BRCA1|KLK13	3.6e-06	0.00077
GO Cellular Component	GO:0070062	Extracellular exosome	2099	17	TGM1|RAC2|KRT6C|KRT6B|CHI3L1|LYZ|SLC9A1|SERPINB3|KRT16|DPP4|S100A8|S100A9|LCN2|KRT6A|GIG25|CXCR4|C1R	3.9e-06	0.00077
GO Cellular Component	GO:0035580	Specific granule lumen	62	4	NFKB1|CHI3L1|LYZ|LCN2	1.87e-05	0.0026
GO Cellular Component	GO:0031410	Cytoplasmic vesicle	2386	17	NFKB1|RAC2|CHI3L1|LYZ|ERBB2|EGFR|SERPINB3|CD1A|DPP4|S100A7|S100A8|S100A9|LCN2|GIG25|CD207|CXCR4|KLK13	2.16e-05	0.0028
GO Cellular Component	GO:0045111	Intermediate filament cytoskeleton	237	6	KRT6C|KRT6B|KRT16|KRT17|S100A8|KRT6A	2.39e-05	0.0028
GO Cellular Component	GO:0030141	Secretory granule	845	10	NFKB1|CHI3L1|LYZ|SERPINB3|S100A7|S100A8|S100A9|LCN2|GIG25|KLK13	2.8e-05	0.003
GO Cellular Component	GO:0005829	Cytosol	5193	26	TGM1|NFKB1|PI3|RAC2|KRT6C|KRT6B|EP300|IL37|STAT3|ERBB2|KRT16|FOS|KRT17|STAT1|S100A7|S100A7A|S100A8|S100A9|LOR|SPRR2B|SPRR2D|CASP7|JUN|LCN2|KRT6A|SPRR2A	2.86e-05	0.003
GO Cellular Component	GO:0035578	Azurophil granule lumen	92	4	LYZ|SERPINB3|S100A7|GIG25	8.18e-05	0.0077
GO Cellular Component	GO:0035976	Transcription factor AP-1 complex	4	2	FOS|JUN	8.38e-05	0.0077
GO Cellular Component	GO:0005882	Intermediate filament	199	5	KRT6C|KRT6B|KRT16|KRT17|KRT6A	0.00012	0.0105
GO Cellular Component	GO:0031012	Extracellular matrix	527	7	PI3|CHI3L1|TNC|S100A7|S100A8|S100A9|GIG25	0.00026	0.0201
GO Cellular Component	GO:0005925	Focal adhesion	405	6	RAC2|SLC9A1|TNC|EGFR|DPP4|S100A7	0.00042	0.0313
GO Cellular Component	GO:0090575	RNA polymerase II transcription regulator complex	163	4	STAT3|FOS|JUN|CREB1	0.00068	0.0413
GO Molecular Function	GO:0004867	Serine-type endopeptidase inhibitor activity	98	5	PI3|SERPINB3|SPINK6|SERPINB4|GIG25	4.66e-06	0.0151
GO Molecular Function	GO:0061629	RNA polymerase II-specific DNA-binding transcription factor binding	283	7	EP300|STAT3|FOS|STAT1|JUN|CREB1|BRCA1	5.45e-06	0.0151
GO Molecular Function	GO:0050786	RAGE receptor binding	12	3	S100A7|S100A8|S100A9	5.75e-06	0.0151
GO Molecular Function	GO:0001102	RNA polymerase II activating transcription factor binding	53	4	EP300|FOS|JUN|CREB1	1.04e-05	0.0151
GO Molecular Function	GO:0019903	Protein phosphatase binding	149	5	SLC9A1|STAT3|ERBB2|EGFR|STAT1	3.29e-05	0.018
GO Molecular Function	GO:0001618	Virus receptor activity	74	4	EGFR|SERPINB3|DPP4|CXCR4	3.63e-05	0.018
GO Molecular Function	GO:0001225	RNA polymerase II transcription coactivator binding	4	2	NFKB1|CREB1	8.38e-05	0.0271
GO Molecular Function	GO:0035662	Toll-like receptor 4 binding	4	2	S100A8|S100A9	8.38e-05	0.0271
GO Molecular Function	GO:0042802	Identical protein binding	1896	14	NFKB1|LYZ|STAT3|ERBB2|EGFR|DPP4|STAT1|JUN|LCN2|C1S|CXCR4|CREB1|BRCA1|C1R	0.0001	0.0271
GO Molecular Function	GO:0005198	Structural molecule activity	635	8	PI3|KRT6B|CHI3L1|TNC|KRT16|KRT17|LOR|KRT6A	0.00013	0.0271
GO Molecular Function	GO:0005200	Structural constituent of cytoskeleton	104	4	KRT6B|KRT16|LOR|KRT6A	0.00013	0.0271
GO Molecular Function	GO:0019899	Enzyme binding	2239	15	NFKB1|RAC2|SLC9A1|STAT3|ERBB2|EGFR|SERPINB3|SERPINB4|DPP4|STAT1|JUN|LCN2|CXCR4|CREB1|BRCA1	0.00016	0.0271
GO Molecular Function	GO:0050544	Arachidonic acid binding	6	2	S100A8|S100A9	0.00016	0.0271
GO Molecular Function	GO:0008134	Transcription factor binding	672	8	NFKB1|EP300|STAT3|FOS|STAT1|JUN|CREB1|BRCA1	0.00019	0.028
GO Molecular Function	GO:0031730	CCR5 chemokine receptor binding	7	2	STAT3|STAT1	0.0002	0.0282
GO Molecular Function	GO:0048020	CCR chemokine receptor binding	47	3	CCL22|STAT3|STAT1	0.00023	0.0282
GO Molecular Function	GO:0005102	Signaling receptor binding	1581	12	CCL22|EP300|IL37|STAT3|ERBB2|EGFR|DPP4|STAT1|S100A7|S100A8|S100A9|BRCA1	0.00028	0.0327
GO Molecular Function	GO:0002020	Protease binding	138	4	SERPINB3|SERPINB4|DPP4|LCN2	0.00037	0.0412
GO Molecular Function	GO:0003682	Chromatin binding	570	7	NFKB1|EP300|STAT3|EGFR|FOS|STAT1|JUN	0.00042	0.0449
InterPro Domains	IPR018039	Intermediate filament protein, conserved site	62	5	KRT6C|KRT6B|KRT16|KRT17|KRT6A	5.49e-07	0.0037
InterPro Domains	IPR001751	S100/Calbindin-D9k, conserved site	25	4	S100A7|S100A7A|S100A8|S100A9	6.58e-07	0.0037
InterPro Domains	IPR013787	S100/CaBP-9k-type, calcium binding, subdomain	29	4	S100A7|S100A7A|S100A8|S100A9	1.13e-06	0.0037
InterPro Domains	IPR039008	Intermediate filament, rod domain	73	5	KRT6C|KRT6B|KRT16|KRT17|KRT6A	1.18e-06	0.0037
InterPro Domains	IPR028477	Protein S100-A7	2	2	S100A7|S100A7A	3.36e-05	0.0455
InterPro Domains	IPR032444	Keratin type II head	25	3	KRT6C|KRT6B|KRT6A	4.05e-05	0.0457
InterPro Domains	IPR003054	Keratin, type II	26	3	KRT6C|KRT6B|KRT6A	4.51e-05	0.0457
KEGG Pathways	hsa04657	IL-17 signaling pathway	92	8	NFKB1|FOS|S100A7|S100A7A|S100A8|S100A9|JUN|LCN2	9.17e-11	3.08e-08
KEGG Pathways	hsa05200	Pathways in cancer	517	12	NFKB1|RAC2|EP300|STAT3|ERBB2|EGFR|FOS|STAT1|CASP7|JUN|IL4R|CXCR4	2.9e-09	4.87e-07
KEGG Pathways	hsa05212	Pancreatic cancer	73	6	NFKB1|RAC2|STAT3|ERBB2|EGFR|STAT1	3.31e-08	3.71e-06
KEGG Pathways	hsa05133	Pertussis	74	6	NFKB1|FOS|CASP7|JUN|C1S|C1R	3.58e-08	3.71e-06
KEGG Pathways	hsa05235	PD-L1 expression and PD-1 checkpoint pathway in cancer	88	6	NFKB1|STAT3|EGFR|FOS|STAT1|JUN	9.45e-08	6.35e-06
KEGG Pathways	hsa05161	Hepatitis B	159	7	NFKB1|EP300|STAT3|FOS|STAT1|JUN|CREB1	1.3e-07	7.26e-06
KEGG Pathways	hsa05206	MicroRNAs in cancer	160	7	NFKB1|EP300|STAT3|TNC|ERBB2|EGFR|BRCA1	1.35e-07	7.26e-06
KEGG Pathways	hsa04659	Th17 cell differentiation	101	6	NFKB1|STAT3|FOS|STAT1|JUN|IL4R	2.05e-07	8.61e-06
KEGG Pathways	hsa05167	Kaposi sarcoma-associated herpesvirus infection	187	7	NFKB1|EP300|STAT3|FOS|STAT1|JUN|CREB1	3.74e-07	1.4e-05
KEGG Pathways	hsa05321	Inflammatory bowel disease	60	5	NFKB1|STAT3|STAT1|JUN|IL4R	4.71e-07	1.58e-05
KEGG Pathways	hsa04024	cAMP signaling pathway	208	7	NFKB1|RAC2|EP300|SLC9A1|FOS|JUN|CREB1	7.48e-07	2.28e-05
KEGG Pathways	hsa04915	Estrogen signaling pathway	133	6	EGFR|KRT16|FOS|KRT17|JUN|CREB1	9.61e-07	2.69e-05
KEGG Pathways	hsa04658	Th1 and Th2 cell differentiation	87	5	NFKB1|FOS|STAT1|JUN|IL4R	2.67e-06	6.91e-05
KEGG Pathways	hsa05215	Prostate cancer	96	5	NFKB1|EP300|ERBB2|EGFR|CREB1	4.23e-06	0.0001
KEGG Pathways	hsa04062	Chemokine signaling pathway	186	6	CCL22|NFKB1|RAC2|STAT3|STAT1|CXCR4	6.26e-06	0.00014
KEGG Pathways	hsa04066	HIF-1 signaling pathway	106	5	NFKB1|EP300|STAT3|ERBB2|EGFR	6.73e-06	0.00014
KEGG Pathways	hsa04668	TNF signaling pathway	112	5	NFKB1|FOS|CASP7|JUN|CREB1	8.71e-06	0.00017
KEGG Pathways	hsa04935	Growth hormone synthesis, secretion and action	118	5	EP300|STAT3|FOS|STAT1|CREB1	1.11e-05	0.00021
KEGG Pathways	hsa04380	Osteoclast differentiation	122	5	NFKB1|FOS|STAT1|JUN|CREB1	1.3e-05	0.00023
KEGG Pathways	hsa05163	Human cytomegalovirus infection	218	6	NFKB1|RAC2|STAT3|EGFR|CXCR4|CREB1	1.51e-05	0.00025
KEGG Pathways	hsa04926	Relaxin signaling pathway	128	5	NFKB1|EGFR|FOS|JUN|CREB1	1.62e-05	0.00026
KEGG Pathways	hsa04151	PI3K-Akt signaling pathway	350	7	NFKB1|TNC|ERBB2|EGFR|IL4R|CREB1|BRCA1	2.1e-05	0.00032
KEGG Pathways	hsa05162	Measles	138	5	NFKB1|STAT3|FOS|STAT1|JUN	2.3e-05	0.00034
KEGG Pathways	hsa04520	Adherens junction	67	4	RAC2|EP300|ERBB2|EGFR	2.5e-05	0.00035
KEGG Pathways	hsa04917	Prolactin signaling pathway	69	4	NFKB1|STAT3|FOS|STAT1	2.79e-05	0.00038
KEGG Pathways	hsa05224	Breast cancer	145	5	ERBB2|EGFR|FOS|JUN|BRCA1	2.9e-05	0.00038
KEGG Pathways	hsa05140	Leishmaniasis	70	4	NFKB1|FOS|STAT1|JUN	2.95e-05	0.00038
KEGG Pathways	hsa04662	B cell receptor signaling pathway	78	4	NFKB1|RAC2|FOS|JUN	4.41e-05	0.00053
KEGG Pathways	hsa04630	JAK-STAT signaling pathway	160	5	EP300|STAT3|EGFR|STAT1|IL4R	4.57e-05	0.00053
KEGG Pathways	hsa05210	Colorectal cancer	82	4	RAC2|EGFR|FOS|JUN	5.32e-05	0.0006
KEGG Pathways	hsa05150	Staphylococcus aureus infection	86	4	KRT16|KRT17|C1S|C1R	6.36e-05	0.00069
KEGG Pathways	hsa04010	MAPK signaling pathway	288	6	NFKB1|RAC2|ERBB2|EGFR|FOS|JUN	6.91e-05	0.00073
KEGG Pathways	hsa05203	Viral carcinogenesis	182	5	NFKB1|EP300|STAT3|JUN|CREB1	8.28e-05	0.00084
KEGG Pathways	hsa01522	Endocrine resistance	95	4	ERBB2|EGFR|FOS|JUN	9.22e-05	0.00091
KEGG Pathways	hsa05231	Choline metabolism in cancer	96	4	RAC2|EGFR|FOS|JUN	9.59e-05	0.00092
KEGG Pathways	hsa04933	AGE-RAGE signaling pathway in diabetic complications	98	4	NFKB1|STAT3|STAT1|JUN	0.0001	0.00097
KEGG Pathways	hsa05146	Amoebiasis	100	4	NFKB1|SERPINB3|CD1A|SERPINB4	0.00011	0.001
KEGG Pathways	hsa04510	Focal adhesion	198	5	RAC2|TNC|ERBB2|EGFR|JUN	0.00012	0.001
KEGG Pathways	hsa04620	Toll-like receptor signaling pathway	101	4	NFKB1|FOS|STAT1|JUN	0.00012	0.001
KEGG Pathways	hsa04625	C-type lectin receptor signaling pathway	102	4	CCL22|NFKB1|STAT1|JUN	0.00012	0.001
KEGG Pathways	hsa05165	Human papillomavirus infection	325	6	NFKB1|EP300|TNC|EGFR|STAT1|CREB1	0.00013	0.0011
KEGG Pathways	hsa05170	Human immunodeficiency virus 1 infection	204	5	NFKB1|RAC2|FOS|JUN|CXCR4	0.00014	0.0011
KEGG Pathways	hsa05166	Human T-cell leukemia virus 1 infection	211	5	NFKB1|EP300|FOS|JUN|CREB1	0.00016	0.0013
KEGG Pathways	hsa05030	Cocaine addiction	49	3	NFKB1|JUN|CREB1	0.00026	0.002
KEGG Pathways	hsa05135	Yersinia infection	125	4	NFKB1|RAC2|FOS|JUN	0.00026	0.002
KEGG Pathways	hsa05418	Fluid shear stress and atherosclerosis	130	4	NFKB1|RAC2|FOS|JUN	0.0003	0.0022
KEGG Pathways	hsa04210	Apoptosis	132	4	NFKB1|FOS|CASP7|JUN	0.00031	0.0022
KEGG Pathways	hsa04932	Non-alcoholic fatty liver disease	148	4	NFKB1|FOS|CASP7|JUN	0.00048	0.0033
KEGG Pathways	hsa05160	Hepatitis C	156	4	NFKB1|STAT3|EGFR|STAT1	0.00058	0.004
KEGG Pathways	hsa05031	Amphetamine addiction	66	3	FOS|JUN|CREB1	0.0006	0.0041
KEGG Pathways	hsa05120	Epithelial cell signaling in Helicobacter pylori infection	67	3	NFKB1|EGFR|JUN	0.00063	0.0042
KEGG Pathways	hsa05223	Non-small cell lung cancer	68	3	STAT3|ERBB2|EGFR	0.00066	0.0042
KEGG Pathways	hsa05152	Tuberculosis	168	4	NFKB1|EP300|STAT1|CREB1	0.00076	0.0048
KEGG Pathways	hsa01521	EGFR tyrosine kinase inhibitor resistance	78	3	STAT3|ERBB2|EGFR	0.00097	0.006
KEGG Pathways	hsa05130	Pathogenic Escherichia coli infection	187	4	NFKB1|FOS|CASP7|JUN	0.0011	0.0068
KEGG Pathways	hsa04012	ErbB signaling pathway	83	3	ERBB2|EGFR|JUN	0.0011	0.0069
KEGG Pathways	hsa05169	Epstein-Barr virus infection	193	4	NFKB1|STAT3|STAT1|JUN	0.0013	0.0074
KEGG Pathways	hsa05205	Proteoglycans in cancer	196	4	SLC9A1|STAT3|ERBB2|EGFR	0.0013	0.0077
KEGG Pathways	hsa04061	Viral protein interaction with cytokine and cytokine receptor	96	3	CCL22|IL37|CXCR4	0.0017	0.0095
KEGG Pathways	hsa04810	Regulation of actin cytoskeleton	209	4	RAC2|SLC9A1|EGFR|CXCR4	0.0017	0.0095
KEGG Pathways	hsa05132	Salmonella infection	209	4	NFKB1|FOS|CASP7|JUN	0.0017	0.0095
KEGG Pathways	hsa05142	Chagas disease	99	3	NFKB1|FOS|JUN	0.0019	0.0102
KEGG Pathways	hsa04660	T cell receptor signaling pathway	101	3	NFKB1|FOS|JUN	0.002	0.0106
KEGG Pathways	hsa04928	Parathyroid hormone synthesis, secretion and action	103	3	EGFR|FOS|CREB1	0.0021	0.011
KEGG Pathways	hsa05145	Toxoplasmosis	105	3	NFKB1|STAT3|STAT1	0.0022	0.0114
KEGG Pathways	hsa04931	Insulin resistance	107	3	NFKB1|STAT3|CREB1	0.0023	0.0118
KEGG Pathways	hsa04919	Thyroid hormone signaling pathway	119	3	EP300|SLC9A1|STAT1	0.0031	0.0156
KEGG Pathways	hsa04068	FoxO signaling pathway	127	3	EP300|STAT3|EGFR	0.0037	0.0184
KEGG Pathways	hsa04060	Cytokine-cytokine receptor interaction	282	4	CCL22|IL37|IL4R|CXCR4	0.0048	0.0232
KEGG Pathways	hsa05219	Bladder cancer	41	2	ERBB2|EGFR	0.0048	0.0232
KEGG Pathways	hsa04921	Oxytocin signaling pathway	149	3	EGFR|FOS|JUN	0.0058	0.0273
KEGG Pathways	hsa04310	Wnt signaling pathway	154	3	RAC2|EP300|JUN	0.0063	0.0294
KEGG Pathways	hsa04530	Tight junction	156	3	ERBB2|CD1A|JUN	0.0065	0.0301
KEGG Pathways	hsa05164	Influenza A	165	3	NFKB1|EP300|STAT1	0.0076	0.0345
KEGG Pathways	hsa05134	Legionellosis	55	2	NFKB1|CASP7	0.0082	0.037
KEGG Pathways	hsa04621	NOD-like receptor signaling pathway	174	3	NFKB1|STAT1|JUN	0.0088	0.0387
KEGG Pathways	hsa05213	Endometrial cancer	57	2	ERBB2|EGFR	0.0088	0.0387
KEGG Pathways	hsa04020	Calcium signaling pathway	193	3	ERBB2|EGFR|CXCR4	0.0115	0.0497
KEGG Pathways	hsa05211	Renal cell carcinoma	66	2	EP300|JUN	0.0116	0.0497
KEGG Pathways	hsa05221	Acute myeloid leukemia	66	2	NFKB1|STAT3	0.0116	0.0497
Monarch Phenotype	HP:0000951	Abnormality of the skin	1892	22	TGM1|NFKB1|RAC2|KRT6C|KRT6B|LYZ|EP300|CDH3|STAT3|TNC|EGFR|KRT16|FOS|KRT17|STAT1|LOR|KRT6A|IL4R|C1S|CXCR4|BRCA1|C1R	6.92e-11	6.86e-07
Monarch Phenotype	HP:0001805	Onychogryposis	24	6	KRT6B|EGFR|KRT16|KRT17|LOR|KRT6A	7.73e-11	6.86e-07
Monarch Phenotype	HP:0001818	Paronychia	11	5	KRT6B|STAT3|KRT16|KRT17|KRT6A	2.72e-10	8.98e-07
Monarch Phenotype	HP:0002715	Abnormality of the immune system	1700	20	TGM1|NFKB1|RAC2|KRT6B|LYZ|EP300|CDH3|STAT3|TNC|ERBB2|EGFR|KRT16|KRT17|STAT1|KRT6A|IL4R|C1S|CXCR4|BRCA1|C1R	6.26e-10	1.55e-06
Monarch Phenotype	HP:0012035	Steatocystoma multiplex	4	4	KRT6B|KRT16|KRT17|KRT6A	2.01e-09	3.32e-06
Monarch Phenotype	HP:0025248	Eruptive vellus hair cyst	4	4	KRT6B|KRT16|KRT17|KRT6A	2.01e-09	3.32e-06
Monarch Phenotype	HP:0002664	Neoplasm	761	14	NFKB1|KRT6B|EP300|STAT3|ERBB2|EGFR|KRT16|KRT17|STAT1|KRT6A|C1S|CXCR4|CREB1|BRCA1	2.05e-09	3.32e-06
Monarch Phenotype	HP:0007490	Linear arrays of macular hyperkeratoses in flexural areas	5	4	KRT6B|KRT16|KRT17|KRT6A	3.61e-09	3.58e-06
Monarch Phenotype	HP:0008401	Onychogryposis of toenails	7	4	KRT6B|KRT16|KRT17|KRT6A	9.43e-09	8.5e-06
Monarch Phenotype	HP:0030318	Angular cheilitis	7	4	KRT6B|KRT16|KRT17|KRT6A	9.43e-09	8.5e-06
Monarch Phenotype	HP:0100872	Abnormality of the plantar skin of foot	175	8	TGM1|KRT6C|KRT6B|KRT16|KRT17|LOR|KRT6A|C1R	1.14e-08	8.66e-06
Monarch Phenotype	HP:0030268	Hyperplastic callus formation	8	4	KRT6B|KRT16|KRT17|KRT6A	1.41e-08	1e-05
Monarch Phenotype	HP:0008404	Nail dystrophy	115	7	TGM1|KRT6B|STAT3|KRT16|KRT17|LOR|KRT6A	1.55e-08	1.02e-05
Monarch Phenotype	HP:0011121	Abnormality of skin morphology	1649	18	TGM1|NFKB1|RAC2|KRT6C|KRT6B|EP300|CDH3|STAT3|EGFR|KRT16|FOS|KRT17|LOR|KRT6A|C1S|CXCR4|BRCA1|C1R	2.04e-08	1.26e-05
Monarch Phenotype	HP:0040036	Onychogryposis of fingernail	9	4	KRT6B|KRT16|KRT17|KRT6A	2.04e-08	1.26e-05
Monarch Phenotype	HP:0007446	Palmoplantar blistering	11	4	KRT6B|KRT16|KRT17|KRT6A	3.87e-08	2.13e-05
Monarch Phenotype	HP:0000695	Natal tooth	35	5	KRT6B|EP300|KRT16|KRT17|KRT6A	3.92e-08	2.13e-05
Monarch Phenotype	HP:0012649	Increased inflammatory response	984	14	TGM1|NFKB1|RAC2|LYZ|EP300|STAT3|TNC|EGFR|KRT17|STAT1|IL4R|C1S|CXCR4|C1R	5.04e-08	2.5e-05
Monarch Phenotype	HP:0007410	Palmoplantar hyperhidrosis	12	4	KRT6B|KRT16|KRT17|KRT6A	5.16e-08	2.5e-05
Monarch Phenotype	HP:0200040	Epidermoid cyst	12	4	KRT6B|KRT16|KRT17|KRT6A	5.16e-08	2.5e-05
Monarch Phenotype	HP:0040211	Abnormal skin morphology of the palm	215	8	TGM1|KRT6C|KRT6B|KRT16|KRT17|LOR|KRT6A|C1R	5.29e-08	2.5e-05
Monarch Phenotype	HP:0011356	Regional abnormality of skin	324	9	TGM1|KRT6C|KRT6B|STAT3|KRT16|KRT17|LOR|KRT6A|C1R	8.13e-08	3.21e-05
Monarch Phenotype	HP:0030766	Ear pain	15	4	KRT6B|KRT16|KRT17|KRT6A	1.09e-07	4.01e-05
Monarch Phenotype	HP:0000972	Palmoplantar hyperkeratosis	156	7	TGM1|KRT6C|KRT6B|KRT16|KRT17|LOR|KRT6A	1.14e-07	4.05e-05
Monarch Phenotype	HP:0000962	Hyperkeratosis	240	8	TGM1|KRT6C|KRT6B|CDH3|KRT16|KRT17|LOR|KRT6A	1.2e-07	4.1e-05
Monarch Phenotype	HP:0011793	Neoplasm by anatomical site	730	12	NFKB1|KRT6B|EP300|STAT3|ERBB2|EGFR|KRT16|KRT17|STAT1|KRT6A|CXCR4|BRCA1	1.22e-07	4.1e-05
Monarch Phenotype	HP:0100798	Fingernail dysplasia	17	4	KRT6B|KRT16|KRT17|KRT6A	1.68e-07	5.05e-05
Monarch Phenotype	HP:0011368	Epidermal thickening	357	9	TGM1|KRT6C|KRT6B|CDH3|KRT16|FOS|KRT17|LOR|KRT6A	1.81e-07	5.14e-05
Monarch Phenotype	HP:0008069	Neoplasm of the skin	172	7	KRT6B|EP300|KRT16|KRT17|STAT1|KRT6A|CXCR4	2.17e-07	5.81e-05
Monarch Phenotype	HP:0007502	Follicular hyperkeratosis	21	4	KRT6B|KRT16|KRT17|KRT6A	3.53e-07	8.97e-05
Monarch Phenotype	HP:0002745	Oral leukoplakia	22	4	KRT6B|KRT16|KRT17|KRT6A	4.16e-07	0.0001
Monarch Phenotype	HP:0000164	Abnormality of the dentition	822	12	TGM1|KRT6B|EP300|CDH3|STAT3|KRT16|KRT17|KRT6A|C1S|CXCR4|BRCA1|C1R	4.27e-07	0.0001
Monarch Phenotype	HP:0011355	Localized skin lesion	527	10	KRT6B|EP300|CDH3|STAT3|KRT16|KRT17|KRT6A|C1S|BRCA1|C1R	4.53e-07	0.0001
Monarch Phenotype	HP:0001595	Abnormal hair morphology	858	12	TGM1|NFKB1|KRT6B|EP300|CDH3|STAT3|EGFR|KRT16|FOS|KRT17|KRT6A|BRCA1	6.69e-07	0.00015
Monarch Phenotype	HP:0010978	Abnormality of immune system physiology	439	9	NFKB1|RAC2|EP300|CDH3|STAT3|STAT1|C1S|CXCR4|C1R	9.86e-07	0.00021
Monarch Phenotype	HP:0002788	Recurrent upper respiratory tract infections	136	6	NFKB1|RAC2|EP300|STAT3|STAT1|CXCR4	1.09e-06	0.00023
Monarch Phenotype	HP:0001609	Hoarse voice	72	5	KRT6B|KRT16|KRT17|KRT6A|C1R	1.1e-06	0.00023
Monarch Phenotype	HP:0012514	Lower limb pain	32	4	KRT6B|KRT16|KRT17|KRT6A	1.61e-06	0.00031
Monarch Phenotype	HP:0000982	Palmoplantar keratoderma	147	6	TGM1|KRT6C|KRT6B|KRT16|KRT17|KRT6A	1.68e-06	0.00032
Monarch Phenotype	HP:0011123	Inflammatory abnormality of the skin	482	9	TGM1|NFKB1|LYZ|STAT3|TNC|EGFR|KRT17|STAT1|IL4R	2.1e-06	0.00039
Monarch Phenotype	HP:0011362	Abnormal hair quantity	508	9	TGM1|NFKB1|KRT6B|CDH3|KRT16|FOS|KRT17|KRT6A|BRCA1	3.2e-06	0.00059
Monarch Phenotype	HP:0001597	Abnormality of the nail	393	8	TGM1|KRT6B|STAT3|EGFR|KRT16|KRT17|LOR|KRT6A	4.46e-06	0.00079
Monarch Phenotype	HP:0001596	Alopecia	187	6	TGM1|NFKB1|KRT6B|KRT16|KRT17|KRT6A	6.45e-06	0.0011
Monarch Phenotype	HP:0002719	Recurrent infections	721	10	TGM1|NFKB1|RAC2|EP300|STAT3|EGFR|STAT1|CXCR4|BRCA1|C1R	7.21e-06	0.0012
Monarch Phenotype	HP:0000153	Abnormality of the mouth	1994	16	TGM1|NFKB1|KRT6B|LYZ|EP300|CDH3|STAT3|EGFR|KRT16|FOS|KRT17|KRT6A|C1S|CXCR4|BRCA1|C1R	9.47e-06	0.0016
Monarch Phenotype	HP:0000388	Otitis media	203	6	TGM1|NFKB1|RAC2|EP300|STAT3|CXCR4	1.02e-05	0.0017
Monarch Phenotype	HP:0001508	Failure to thrive	950	11	TGM1|NFKB1|KRT6B|EP300|STAT3|ERBB2|KRT16|FOS|KRT17|KRT6A|BRCA1	1.27e-05	0.0021
Monarch Phenotype	HP:0006292	Abnormality of dental eruption	212	6	KRT6B|EP300|STAT3|KRT16|KRT17|KRT6A	1.29e-05	0.0021
Monarch Phenotype	HP:0002960	Autoimmunity	122	5	NFKB1|STAT3|STAT1|C1S|C1R	1.3e-05	0.0021
Monarch Phenotype	HP:0006349	Agenesis of permanent teeth	18	3	EP300|C1S|C1R	1.66e-05	0.0026
Monarch Phenotype	HP:0002086	Abnormality of the respiratory system	1638	14	TGM1|NFKB1|RAC2|KRT6B|EP300|STAT3|ERBB2|EGFR|KRT16|KRT17|STAT1|KRT6A|CXCR4|BRCA1	2.05e-05	0.0031
Monarch Phenotype	HP:0000271	Abnormality of the face	2644	18	TGM1|NFKB1|RAC2|KRT6B|LYZ|EP300|CDH3|STAT3|EGFR|KRT16|FOS|KRT17|STAT1|KRT6A|C1S|CXCR4|BRCA1|C1R	2.06e-05	0.0031
Monarch Phenotype	HP:0000163	Abnormal oral cavity morphology	644	9	TGM1|EP300|STAT3|EGFR|KRT6A|C1S|CXCR4|BRCA1|C1R	2.09e-05	0.0031
Monarch Phenotype	HP:0025031	Abnormality of the digestive system	2389	17	NFKB1|RAC2|KRT6B|LYZ|EP300|STAT3|ERBB2|EGFR|KRT16|FOS|KRT17|STAT1|KRT6A|C1S|CXCR4|BRCA1|C1R	2.19e-05	0.0031
Monarch Phenotype	HP:0002817	Abnormality of the upper limb	1428	13	TGM1|KRT6C|KRT6B|EP300|CDH3|ERBB2|KRT16|FOS|KRT17|LOR|KRT6A|BRCA1|C1R	2.28e-05	0.0032
Monarch Phenotype	HP:0012718	Morphological abnormality of the gastrointestinal tract	841	10	NFKB1|RAC2|EP300|STAT3|ERBB2|EGFR|STAT1|CXCR4|BRCA1|C1R	2.69e-05	0.0037
Monarch Phenotype	HP:0000598	Abnormality of the ear	1920	15	TGM1|NFKB1|RAC2|KRT6B|EP300|STAT3|TNC|ERBB2|EGFR|KRT16|KRT17|LOR|KRT6A|CXCR4|BRCA1	2.73e-05	0.0037
Monarch Phenotype	HP:0002164	Nail dysplasia	145	5	TGM1|KRT6B|KRT16|KRT17|KRT6A	2.9e-05	0.0039
Monarch Phenotype	HP:0001507	Growth abnormality	2181	16	TGM1|NFKB1|KRT6B|EP300|SLC9A1|CDH3|STAT3|ERBB2|KRT16|FOS|KRT17|STAT1|KRT6A|C1S|BRCA1|C1R	2.91e-05	0.0039
Monarch Phenotype	HP:0000168	Abnormality of the gingiva	154	5	STAT3|KRT6A|C1S|CXCR4|C1R	3.83e-05	0.0049
Monarch Phenotype	HP:0001231	Abnormal fingernail morphology	157	5	KRT6B|STAT3|KRT16|KRT17|KRT6A	4.19e-05	0.0053
Monarch Phenotype	HP:0001155	Abnormality of the hand	908	10	TGM1|KRT6C|KRT6B|CDH3|KRT16|KRT17|LOR|KRT6A|BRCA1|C1R	5.13e-05	0.0064
Monarch Phenotype	HP:0011842	Abnormal skeletal morphology	2573	17	TGM1|NFKB1|RAC2|KRT6B|EP300|CDH3|STAT3|ERBB2|KRT16|FOS|KRT17|STAT1|KRT6A|C1S|CXCR4|BRCA1|C1R	5.73e-05	0.007
Monarch Phenotype	HP:0011893	Abnormal leukocyte count	292	6	NFKB1|RAC2|STAT3|STAT1|CXCR4|BRCA1	7.44e-05	0.0088
Monarch Phenotype	HP:0000118	Phenotypic abnormality	5134	25	TGM1|NFKB1|RAC2|KRT6C|KRT6B|LYZ|EP300|SLC9A1|CDH3|STAT3|TNC|ERBB2|EGFR|KRT16|FOS|KRT17|STAT1|LOR|KRT6A|IL4R|C1S|CXCR4|CREB1|BRCA1|C1R	7.89e-05	0.0092
Monarch Phenotype	HP:0011276	Vascular skin abnormality	434	7	TGM1|NFKB1|STAT3|EGFR|FOS|C1S|C1R	8.01e-05	0.0092
Monarch Phenotype	HP:0100806	Sepsis	92	4	TGM1|RAC2|ERBB2|CXCR4	8.18e-05	0.0093
Monarch Phenotype	HP:0040181	Chapped lip	4	2	EGFR|KRT6A	8.38e-05	0.0094
Monarch Phenotype	HP:0001890	Autoimmune hemolytic anemia	33	3	NFKB1|STAT3|STAT1	8.71e-05	0.0097
Monarch Phenotype	HP:0001581	Recurrent skin infections	96	4	NFKB1|STAT3|EGFR|STAT1	9.59e-05	0.0106
Monarch Phenotype	HP:0000704	Periodontitis	36	3	C1S|CXCR4|C1R	0.00011	0.0119
Monarch Phenotype	HP:0006532	Recurrent pneumonia	100	4	NFKB1|RAC2|STAT3|CXCR4	0.00011	0.0119
Monarch Phenotype	HP:0012252	Abnormal respiratory system morphology	314	6	NFKB1|RAC2|STAT3|ERBB2|EGFR|CXCR4	0.00011	0.0119
Monarch Phenotype	HP:0002244	Abnormality of the small intestine	196	5	EP300|STAT3|STAT1|CXCR4|BRCA1	0.00012	0.012
Monarch Phenotype	HP:0002597	Abnormality of the vasculature	1673	13	TGM1|NFKB1|RAC2|LYZ|EP300|STAT3|EGFR|FOS|STAT1|C1S|CXCR4|BRCA1|C1R	0.00012	0.012
Monarch Phenotype	HP:0006308	Atrophy of alveolar ridges	5	2	C1S|C1R	0.00012	0.012
Monarch Phenotype	HP:0100658	Cellulitis	38	3	RAC2|STAT3|CXCR4	0.00013	0.0129
Monarch Phenotype	HP:0002205	Recurrent respiratory infections	473	7	TGM1|NFKB1|RAC2|EP300|STAT3|STAT1|CXCR4	0.00014	0.0135
Monarch Phenotype	HP:0001973	Autoimmune thrombocytopenia	39	3	NFKB1|STAT3|STAT1	0.00014	0.0136
Monarch Phenotype	HP:0001760	Abnormal foot morphology	1254	11	TGM1|KRT6C|KRT6B|EP300|KRT16|FOS|KRT17|LOR|KRT6A|BRCA1|C1R	0.00016	0.0151
Monarch Phenotype	HP:0001888	Lymphopenia	114	4	NFKB1|RAC2|STAT1|CXCR4	0.00018	0.0173
Monarch Phenotype	HP:0002242	Abnormal intestine morphology	673	8	RAC2|EP300|STAT3|ERBB2|STAT1|CXCR4|BRCA1|C1R	0.00019	0.0182
Monarch Phenotype	HP:0007378	Neoplasm of the gastrointestinal tract	221	5	NFKB1|EP300|ERBB2|STAT1|BRCA1	0.0002	0.0188
Monarch Phenotype	HP:0005368	Abnormality of humoral immunity	222	5	NFKB1|RAC2|STAT3|C1S|CXCR4	0.00021	0.019
Monarch Phenotype	HP:0006482	Abnormality of dental morphology	228	5	EP300|CDH3|C1S|BRCA1|C1R	0.00023	0.0211
Monarch Phenotype	HP:0002088	Abnormal lung morphology	894	9	TGM1|NFKB1|RAC2|EP300|STAT3|ERBB2|EGFR|STAT1|CXCR4	0.00025	0.0224
Monarch Phenotype	HP:0002110	Bronchiectasis	124	4	NFKB1|RAC2|STAT1|CXCR4	0.00025	0.0224
Monarch Phenotype	HP:0032101	Unusual infection	132	4	RAC2|STAT3|STAT1|CXCR4	0.00031	0.0277
Monarch Phenotype	HP:0002090	Pneumonia	245	5	NFKB1|RAC2|EP300|STAT3|CXCR4	0.00032	0.0279
Monarch Phenotype	HP:0004322	Short stature	1154	10	TGM1|EP300|SLC9A1|CDH3|STAT3|ERBB2|STAT1|C1S|BRCA1|C1R	0.00036	0.031
Monarch Phenotype	HP:0006481	Abnormality of primary teeth	58	3	STAT3|C1S|C1R	0.00042	0.0357
Monarch Phenotype	HP:0006519	Alveolar cell carcinoma	11	2	ERBB2|EGFR	0.00043	0.0362
Monarch Phenotype	HP:0011792	Neoplasm by histology	267	5	EP300|ERBB2|CXCR4|CREB1|BRCA1	0.00047	0.0393
Monarch Phenotype	HP:0000964	Eczema	269	5	NFKB1|STAT3|TNC|STAT1|IL4R	0.00049	0.0401
Monarch Phenotype	HP:0001875	Neutropenia	156	4	RAC2|STAT3|STAT1|CXCR4	0.00058	0.0463
Monarch Phenotype	HP:0030078	Lung adenocarcinoma	13	2	ERBB2|EGFR	0.00058	0.0463
Pfam	PF01023	S-100/ICaBP type calcium binding domain	28	4	S100A7|S100A7A|S100A8|S100A9	9.91e-07	0.0034
Pfam	PF14820	Small proline-rich 2	6	3	SPRR2B|SPRR2D|SPRR2A	1.07e-06	0.0034
Pfam	PF00038	Intermediate filament protein	72	5	KRT6C|KRT6B|KRT16|KRT17|KRT6A	1.1e-06	0.0034
Pfam	PF16208	Keratin type II head	25	3	KRT6C|KRT6B|KRT6A	4.05e-05	0.0349
Reactome Pathways	HSA-6809371	Formation of the cornified envelope	127	13	TGM1|PI3|KRT6C|KRT6B|KRT16|KRT17|SPINK6|LOR|SPRR2B|SPRR2D|KRT6A|SPRR2A|KLK13	8.09e-18	1.76e-14
Reactome Pathways	HSA-1266738	Developmental Biology	1087	21	TGM1|NFKB1|PI3|KRT6C|KRT6B|EP300|STAT3|ERBB2|EGFR|KRT16|KRT17|SPINK6|LOR|SPRR2B|SPRR2D|JUN|KRT6A|SPRR2A|CXCR4|CREB1|KLK13	1.58e-14	1.14e-11
Reactome Pathways	HSA-168256	Immune System	1956	25	CCL22|NFKB1|PI3|RAC2|CHI3L1|LYZ|EP300|IL37|STAT3|SERPINB3|CD1A|FOS|STAT1|S100A7|S100A7A|S100A8|S100A9|JUN|LCN2|GIG25|IL4R|C1S|CD207|CREB1|C1R	1.81e-13	9.82e-11
Reactome Pathways	HSA-168249	Innate Immune System	1025	18	NFKB1|PI3|RAC2|CHI3L1|LYZ|EP300|SERPINB3|FOS|S100A7|S100A7A|S100A8|S100A9|JUN|LCN2|GIG25|C1S|CREB1|C1R	1.05e-11	4.58e-09
Reactome Pathways	HSA-6799990	Metal sequestration by antimicrobial proteins	6	5	S100A7|S100A7A|S100A8|S100A9|LCN2	2.9e-11	1.05e-08
Reactome Pathways	HSA-6803157	Antimicrobial peptides	87	7	PI3|LYZ|S100A7|S100A7A|S100A8|S100A9|LCN2	2.49e-09	7.73e-07
Reactome Pathways	HSA-449147	Signaling by Interleukins	440	10	CCL22|NFKB1|IL37|STAT3|FOS|STAT1|JUN|LCN2|IL4R|CREB1	8.86e-08	2.41e-05
Reactome Pathways	HSA-6785807	Interleukin-4 and Interleukin-13 signaling	107	6	CCL22|STAT3|FOS|STAT1|LCN2|IL4R	2.83e-07	6.84e-05
Reactome Pathways	HSA-6798695	Neutrophil degranulation	473	9	NFKB1|CHI3L1|LYZ|SERPINB3|S100A7|S100A8|S100A9|LCN2|GIG25	1.8e-06	0.00039
Reactome Pathways	HSA-168898	Toll-like Receptor Cascades	152	6	NFKB1|FOS|S100A8|S100A9|JUN|CREB1	2.03e-06	0.0004
Reactome Pathways	HSA-450294	MAP kinase activation	63	4	NFKB1|FOS|JUN|CREB1	1.99e-05	0.0033
Reactome Pathways	HSA-5668599	RHO GTPases Activate NADPH Oxidases	24	3	RAC2|S100A8|S100A9	3.62e-05	0.0052
Reactome Pathways	HSA-9634638	Estrogen-dependent nuclear events downstream of ESR-membrane signaling	24	3	EGFR|FOS|CREB1	3.62e-05	0.0052
Reactome Pathways	HSA-5663202	Diseases of signal transduction by growth factor receptors and second messengers	392	7	RAC2|EP300|STAT3|ERBB2|EGFR|STAT1|CREB1	4.27e-05	0.0054
Reactome Pathways	HSA-2559582	Senescence-Associated Secretory Phenotype (SASP)	80	4	NFKB1|STAT3|FOS|JUN	4.85e-05	0.0059
Reactome Pathways	HSA-450282	MAPK targets/ Nuclear events mediated by MAP kinases	31	3	FOS|JUN|CREB1	7.33e-05	0.0071
Reactome Pathways	HSA-1251932	PLCG1 events in ERBB2 signaling	4	2	ERBB2|EGFR	8.38e-05	0.0071
Reactome Pathways	HSA-8939211	ESR-mediated signaling	189	5	EP300|EGFR|FOS|JUN|CREB1	9.85e-05	0.0071
Reactome Pathways	HSA-8864260	Transcriptional regulation by the AP-2 (TFAP2) family of transcription factors	35	3	EP300|ERBB2|EGFR	0.0001	0.0071
Reactome Pathways	HSA-157118	Signaling by NOTCH	202	5	EP300|EGFR|STAT1|JUN|CREB1	0.00013	0.0078
Reactome Pathways	HSA-2219528	PI3K/AKT Signaling in Cancer	105	4	RAC2|ERBB2|EGFR|CREB1	0.00013	0.0078
Reactome Pathways	HSA-9031628	NGF-stimulated transcription	39	3	EP300|FOS|CREB1	0.00014	0.0078
Reactome Pathways	HSA-187037	Signaling by NTRK1 (TRKA)	115	4	EP300|STAT3|FOS|CREB1	0.00019	0.0102
Reactome Pathways	HSA-9006934	Signaling by Receptor Tyrosine Kinases	502	7	EP300|STAT3|ERBB2|EGFR|FOS|STAT1|CREB1	0.00019	0.0103
Reactome Pathways	HSA-173623	Classical antibody-mediated complement activation	7	2	C1S|C1R	0.0002	0.0104
Reactome Pathways	HSA-9012852	Signaling by NOTCH3	49	3	EP300|EGFR|STAT1	0.00026	0.0133
Reactome Pathways	HSA-8985947	Interleukin-9 signaling	9	2	STAT3|STAT1	0.0003	0.0147
Reactome Pathways	HSA-8848021	Signaling by PTK6	53	3	STAT3|ERBB2|EGFR	0.00033	0.0154
Reactome Pathways	HSA-450341	Activation of the AP-1 family of transcription factors	10	2	FOS|JUN	0.00037	0.0162
Reactome Pathways	HSA-9020958	Interleukin-21 signaling	10	2	STAT3|STAT1	0.00037	0.0162
Reactome Pathways	HSA-1059683	Interleukin-6 signaling	11	2	STAT3|STAT1	0.00043	0.0184
Reactome Pathways	HSA-9020956	Interleukin-27 signaling	11	2	STAT3|STAT1	0.00043	0.0184
Reactome Pathways	HSA-9616222	Transcriptional regulation of granulopoiesis	59	3	EP300|STAT3|CREB1	0.00044	0.0184
Reactome Pathways	HSA-1257604	PIP3 activates AKT signaling	264	5	RAC2|ERBB2|EGFR|JUN|CREB1	0.00045	0.0184
Reactome Pathways	HSA-2197563	NOTCH2 intracellular domain regulates transcription	12	2	EP300|CREB1	0.0005	0.0191
Reactome Pathways	HSA-8866910	TFAP2 (AP-2) family regulates transcription of growth factors and their receptors	12	2	ERBB2|EGFR	0.0005	0.0191
Reactome Pathways	HSA-8984722	Interleukin-35 Signalling	12	2	STAT3|STAT1	0.0005	0.0191
Reactome Pathways	HSA-9673767	Signaling by PDGFRA transmembrane, juxtamembrane and kinase domain mutants	12	2	STAT3|STAT1	0.0005	0.0191
Reactome Pathways	HSA-9673770	Signaling by PDGFRA extracellular domain mutants	12	2	STAT3|STAT1	0.0005	0.0191
Reactome Pathways	HSA-6796648	TP53 Regulates Transcription of DNA Repair Genes	65	3	FOS|JUN|BRCA1	0.00058	0.0203
Reactome Pathways	HSA-8847993	ERBB2 Activates PTK6 Signaling	13	2	ERBB2|EGFR	0.00058	0.0203
Reactome Pathways	HSA-6785631	ERBB2 Regulates Cell Motility	15	2	ERBB2|EGFR	0.00075	0.0246
Reactome Pathways	HSA-1963640	GRB2 events in ERBB2 signaling	16	2	ERBB2|EGFR	0.00084	0.027
Reactome Pathways	HSA-1963642	PI3K events in ERBB2 signaling	16	2	ERBB2|EGFR	0.00084	0.027
Reactome Pathways	HSA-9665348	Signaling by ERBB2 ECD mutants	16	2	ERBB2|EGFR	0.00084	0.027
Reactome Pathways	HSA-1643685	Disease	1548	11	NFKB1|RAC2|EP300|STAT3|ERBB2|EGFR|STAT1|JUN|CXCR4|CREB1|BRCA1	0.00093	0.028
Reactome Pathways	HSA-2219530	Constitutive Signaling by Aberrant PI3K in Cancer	78	3	RAC2|ERBB2|EGFR	0.00097	0.0287
Reactome Pathways	HSA-1839117	Signaling by cytosolic FGFR1 fusion mutants	18	2	STAT3|STAT1	0.001	0.0305
Reactome Pathways	HSA-881907	Gastrin-CREB signalling pathway via PKC and MAPK	18	2	EGFR|CREB1	0.001	0.0305
Reactome Pathways	HSA-5686938	Regulation of TLR by endogenous ligand	19	2	S100A8|S100A9	0.0011	0.0328
Reactome Pathways	HSA-9670439	Signaling by phosphorylated juxtamembrane, extracellular and kinase domain KIT mutants	20	2	STAT3|STAT1	0.0013	0.0355
Reactome Pathways	HSA-5621575	CD209 (DC-SIGN) signaling	21	2	NFKB1|EP300	0.0014	0.0374
Reactome Pathways	HSA-9008059	Interleukin-37 signaling	21	2	IL37|STAT3	0.0014	0.0374
Reactome Pathways	HSA-1250196	SHC1 events in ERBB2 signaling	22	2	ERBB2|EGFR	0.0015	0.0397
Reactome Pathways	HSA-9665686	Signaling by ERBB2 TMD/JMD mutants	22	2	ERBB2|EGFR	0.0015	0.0397
Reactome Pathways	HSA-982772	Growth hormone receptor signaling	23	2	STAT3|STAT1	0.0016	0.0416
Reactome Pathways	HSA-8854691	Interleukin-20 family signaling	25	2	STAT3|STAT1	0.0019	0.0474
Reactome Pathways	HSA-9013508	NOTCH3 Intracellular Domain Regulates Transcription	25	2	EP300|STAT1	0.0019	0.0474
Reactome Pathways	HSA-9664565	Signaling by ERBB2 KD Mutants	25	2	ERBB2|EGFR	0.0019	0.0474
Reactome Pathways	HSA-212436	Generic Transcription Pathway	1197	9	NFKB1|EP300|ERBB2|EGFR|FOS|STAT1|JUN|CREB1|BRCA1	0.002	0.0481
Reactome Pathways	HSA-9609690	HCMV Early Events	102	3	NFKB1|EGFR|CREB1	0.002	0.0486
SMART Domains	SM01391	Intermediate filament protein	67	5	KRT6C|KRT6B|KRT16|KRT17|KRT6A	7.88e-07	0.00057
STRING Clusters	CL:36240	Mixed, incl. Keratinization, and S-100/ICaBP type calcium binding domain	90	11	TGM1|PI3|SERPINB3|SPINK6|SERPINB4|S100A7|S100A7A|LOR|SPRR2B|SPRR2D|SPRR2A	5.76e-16	2.62e-12
STRING Clusters	CL:36241	Keratinization, and S-100/ICaBP type calcium binding domain	73	10	TGM1|PI3|SERPINB3|SERPINB4|S100A7|S100A7A|LOR|SPRR2B|SPRR2D|SPRR2A	4.8e-15	1.09e-11
STRING Clusters	CL:36242	Keratinization, and S-100/ICaBP type calcium binding domain	64	8	TGM1|PI3|S100A7|S100A7A|LOR|SPRR2B|SPRR2D|SPRR2A	6.2e-12	9.39e-09
STRING Clusters	CL:36284	Mixed, incl. Small proline-rich 2, and Cornifin (SPRR1)	17	6	TGM1|PI3|LOR|SPRR2B|SPRR2D|SPRR2A	1.33e-11	1.51e-08
STRING Clusters	CL:36140	Keratin type II head, and Large cell acanthoma	22	3	KRT6C|KRT16|KRT6A	2.86e-05	0.0186
TISSUES	BTO:0001253	Skin	1069	21	TGM1|PI3|KRT6C|KRT6B|CDH3|CD1A|KRT16|KRT17|S100A7|S100A7A|S100A8|S100A9|LOR|SPRR2B|SPRR2D|CASP7|KRT6A|GIG25|CD207|C1R|KLK13	1.14e-14	2.18e-11
TISSUES	BTO:0000435	Stratum spinosum	106	10	TGM1|PI3|KRT6B|CD1A|KRT16|S100A7|S100A8|S100A9|SPRR2D|CD207	1.52e-13	1.45e-10
TISSUES	BTO:0000634	Integument	1970	24	TGM1|PI3|KRT6C|KRT6B|CDH3|ERBB2|CD1A|KRT16|KRT17|DPP4|S100A7|S100A7A|S100A8|S100A9|LOR|SPRR2B|SPRR2D|CASP7|KRT6A|GIG25|CD207|BRCA1|C1R|KLK13	2.06e-12	1.3e-09
TISSUES	BTO:0000404	Epidermis	277	12	TGM1|PI3|KRT6B|CD1A|KRT16|S100A7|S100A7A|S100A8|S100A9|LOR|SPRR2D|CD207	2.75e-12	1.31e-09
TISSUES	BTO:0001470	Epidermal cell	185	10	TGM1|PI3|KRT6B|CD1A|KRT16|S100A7|S100A8|S100A9|SPRR2D|CD207	2.82e-11	1.07e-08
TISSUES	BTO:0000667	Keratinocyte	99	8	TGM1|PI3|KRT6B|KRT16|S100A7|S100A8|S100A9|SPRR2D	1.59e-10	5.03e-08
TISSUES	BTO:0000180	Cervical carcinoma cell	271	10	EP300|STAT3|ERBB2|EGFR|KRT17|STAT1|JUN|CXCR4|CREB1|BRCA1	1.01e-09	2.74e-07
TISSUES	BTO:0001489	Whole body	12619	47	TGM1|CCL22|NFKB1|PI3|RAC2|KRT6C|KRT6B|CHI3L1|LYZ|EP300|IL37|SLC9A1|CDH3|STAT3|TNC|ERBB2|EGFR|SERPINB3|CD1A|KRT16|FOS|KRT17|SPINK6|SERPINB4|DPP4|STAT1|S100A7|S100A7A|S100A8|S100A9|LOR|SPRR2B|SPRR2D|CASP7|JUN|LCN2|KRT6A|SPRR2A|GIG25|IL4R|C1S|CD207|CXCR4|CREB1|BRCA1|C1R|KLK13	1.15e-09	2.74e-07
TISSUES	BTO:0001491	Viscus	5020	29	TGM1|CCL22|NFKB1|KRT6C|LYZ|EP300|SLC9A1|STAT3|TNC|ERBB2|EGFR|SERPINB3|KRT16|FOS|KRT17|SERPINB4|DPP4|STAT1|S100A8|S100A9|CASP7|JUN|LCN2|KRT6A|GIG25|C1S|CXCR4|CREB1|C1R	2.11e-07	4.47e-05
TISSUES	BTO:0000583	Bone marrow cancer cell	395	9	NFKB1|EP300|STAT3|ERBB2|STAT1|CASP7|JUN|CREB1|BRCA1	4.16e-07	7.93e-05
TISSUES	BTO:0001546	Chronic lymphocytic leukemia cell	193	7	NFKB1|EP300|FOS|STAT1|JUN|CREB1|BRCA1	4.6e-07	7.95e-05
TISSUES	BTO:0000345	Digestive gland	2645	20	NFKB1|LYZ|EP300|STAT3|TNC|ERBB2|EGFR|FOS|KRT17|DPP4|STAT1|S100A8|S100A9|JUN|LCN2|KRT6A|GIG25|C1S|CREB1|C1R	1.05e-06	0.00017
TISSUES	BTO:0000426	Erythroleukemia cell	225	7	EP300|STAT3|ERBB2|STAT1|JUN|CREB1|BRCA1	1.24e-06	0.00018
TISSUES	BTO:0001271	Leukemia cell	949	12	NFKB1|EP300|SLC9A1|STAT3|ERBB2|FOS|STAT1|CASP7|JUN|IL4R|CREB1|BRCA1	1.9e-06	0.00026
TISSUES	BTO:0000130	Neutrophil	34	4	RAC2|S100A8|LCN2|CXCR4	2.01e-06	0.00026
TISSUES	BTO:0001090	Mouth	482	9	LYZ|CDH3|ERBB2|KRT17|S100A8|S100A9|SPRR2D|KRT6A|SPRR2A	2.1e-06	0.00026
TISSUES	BTO:0000744	Lymphocytic leukemia cell	361	8	NFKB1|EP300|SLC9A1|FOS|STAT1|JUN|CREB1|BRCA1	2.41e-06	0.00027
TISSUES	BTO:0000089	Blood	1675	15	CCL22|RAC2|CHI3L1|IL37|SLC9A1|CD1A|FOS|DPP4|S100A8|S100A9|CASP7|LCN2|IL4R|C1S|CXCR4	5.33e-06	0.00051
TISSUES	BTO:0000959	Esophagus	105	5	TGM1|KRT6C|KRT16|SERPINB4|LCN2	6.44e-06	0.00058
TISSUES	BTO:0004086	Mammary gland tumor cell line	13	3	ERBB2|EGFR|BRCA1	7.07e-06	0.00061
TISSUES	BTO:0001493	Trunk	927	11	KRT6B|ERBB2|CD1A|KRT16|FOS|KRT17|S100A8|JUN|KRT6A|IL4R|BRCA1	1.01e-05	0.00077
TISSUES	BTO:0001385	Tongue	119	5	CDH3|KRT17|S100A8|SPRR2D|SPRR2A	1.16e-05	0.00085
TISSUES	BTO:0000058	Alimentary canal	1865	15	TGM1|KRT6C|LYZ|SLC9A1|ERBB2|KRT16|FOS|SERPINB4|DPP4|S100A8|LCN2|KRT6A|C1S|CXCR4|C1R	1.94e-05	0.0013
TISSUES	BTO:0000759	Liver	1882	15	NFKB1|EP300|STAT3|TNC|ERBB2|EGFR|DPP4|STAT1|S100A8|S100A9|LCN2|GIG25|C1S|CREB1|C1R	2.16e-05	0.0014
TISSUES	BTO:0000392	Plasma cell	137	5	DPP4|LCN2|GIG25|C1S|C1R	2.23e-05	0.0014
TISSUES	BTO:0000751	Leukocyte	849	10	RAC2|IL37|SLC9A1|CD1A|S100A8|S100A9|CASP7|LCN2|C1S|CXCR4	2.92e-05	0.0018
TISSUES	BTO:0001932	BT-474 cell	3	2	ERBB2|EGFR	5.59e-05	0.0032
TISSUES	BTO:0002419	SK-BR-3 cell	3	2	ERBB2|EGFR	5.59e-05	0.0032
TISSUES	BTO:0001208	Larynx	32	3	KRT6B|KRT17|KRT6A	8e-05	0.0041
TISSUES	BTO:0001488	Endocrine gland	6036	27	CCL22|NFKB1|LYZ|EP300|CDH3|STAT3|TNC|ERBB2|EGFR|CD1A|KRT16|FOS|KRT17|DPP4|STAT1|S100A8|S100A9|JUN|LCN2|KRT6A|GIG25|IL4R|C1S|CXCR4|CREB1|BRCA1|C1R	0.00015	0.0071
TISSUES	BTO:0000344	Stratum corneum	6	2	PI3|LOR	0.00016	0.0074
TISSUES	BTO:0000705	Langerhans cell	6	2	CD1A|CD207	0.00016	0.0074
TISSUES	BTO:0000570	Hematopoietic system	2543	16	CCL22|RAC2|CHI3L1|IL37|SLC9A1|STAT3|CD1A|FOS|DPP4|S100A8|S100A9|CASP7|LCN2|IL4R|C1S|CXCR4	0.00019	0.0084
TISSUES	BTO:0005810	Immune system	1553	12	CCL22|IL37|SLC9A1|STAT3|CD1A|FOS|S100A9|CASP7|IL4R|C1S|CD207|CXCR4	0.00024	0.0104
TISSUES	BTO:0000522	Gland	6602	28	CCL22|NFKB1|LYZ|EP300|SLC9A1|CDH3|STAT3|TNC|ERBB2|EGFR|CD1A|KRT16|FOS|KRT17|DPP4|STAT1|S100A8|S100A9|JUN|LCN2|KRT6A|GIG25|IL4R|C1S|CXCR4|CREB1|BRCA1|C1R	0.00026	0.0109
TISSUES	BTO:0000988	Pancreas	568	7	STAT3|FOS|KRT17|JUN|LCN2|KRT6A|GIG25	0.00041	0.0169
TISSUES	BTO:0001049	Pharynx	68	3	LYZ|S100A8|KRT6A	0.00066	0.0266
TISSUES	BTO:0000801	Macrophage	71	3	CCL22|CD1A|CD207	0.00074	0.0288
TISSUES	BTO:0000167	Adenocarcinoma cell line	83	3	ERBB2|EGFR|S100A8	0.0011	0.0437
UniProt Keywords	KW-1007	Palmoplantar keratoderma	36	6	KRT6C|KRT6B|KRT16|KRT17|LOR|KRT6A	6.68e-10	4.52e-07
UniProt Keywords	KW-0038	Ectodermal dysplasia	49	5	KRT6B|CDH3|KRT16|KRT17|KRT6A	1.84e-07	6.21e-05
UniProt Keywords	KW-0964	Secreted	1818	17	CCL22|PI3|CHI3L1|LYZ|IL37|TNC|EGFR|SPINK6|DPP4|S100A7|S100A8|S100A9|LCN2|GIG25|IL4R|C1R|KLK13	5.34e-07	0.00012
UniProt Keywords	KW-0403	Intermediate filament	75	5	KRT6C|KRT6B|KRT16|KRT17|KRT6A	1.33e-06	0.00023
UniProt Keywords	KW-0722	Serine protease inhibitor	80	5	PI3|SERPINB3|SPINK6|SERPINB4|GIG25	1.8e-06	0.00024
UniProt Keywords	KW-0417	Keratinization	38	4	TGM1|LOR|SPRR2B|SPRR2D	3.03e-06	0.00034
UniProt Keywords	KW-9995	Disease	3996	24	TGM1|RAC2|KRT6C|KRT6B|CHI3L1|LYZ|EP300|SLC9A1|CDH3|STAT3|TNC|EGFR|KRT16|FOS|KRT17|STAT1|LOR|JUN|KRT6A|GIG25|C1S|CXCR4|BRCA1|C1R	3.14e-06	0.00034
UniProt Keywords	KW-0225	Disease mutation	3145	20	TGM1|RAC2|KRT6C|KRT6B|LYZ|EP300|SLC9A1|CDH3|STAT3|TNC|EGFR|KRT16|KRT17|STAT1|KRT6A|GIG25|C1S|CXCR4|BRCA1|C1R	1.55e-05	0.0012
UniProt Keywords	KW-0416	Keratin	136	5	KRT6C|KRT6B|KRT16|KRT17|KRT6A	2.15e-05	0.0015
UniProt Keywords	KW-0929	Antimicrobial	93	4	CHI3L1|LYZ|S100A8|S100A9	8.52e-05	0.0052
UniProt Keywords	KW-1015	Disulfide bond	3304	19	CCL22|PI3|CHI3L1|LYZ|TNC|ERBB2|EGFR|CD1A|SPINK6|DPP4|S100A7|LOR|LCN2|IL4R|C1S|CD207|CXCR4|C1R|KLK13	0.00012	0.0066
UniProt Keywords	KW-0391	Immunity	522	7	CD1A|S100A8|S100A9|LCN2|IL4R|C1S|C1R	0.00025	0.0128
UniProt Keywords	KW-0720	Serine protease	135	4	DPP4|C1S|C1R|KLK13	0.00034	0.0164
UniProt Keywords	KW-0702	S-nitrosylation	56	3	NFKB1|S100A8|S100A9	0.00038	0.0172
UniProt Keywords	KW-0248	Ehlers-Danlos syndrome	17	2	C1S|C1R	0.00094	0.0396
UniProt Keywords	KW-0010	Activator	674	7	NFKB1|STAT3|ERBB2|STAT1|JUN|CREB1|BRCA1	0.0011	0.044
UniProt Keywords	KW-0399	Innate immunity	324	5	S100A8|S100A9|LCN2|C1S|C1R	0.0011	0.044
WikiPathways	WP395	IL-4 signaling pathway	54	6	NFKB1|EP300|STAT3|FOS|STAT1|IL4R	6.18e-09	4.19e-06
WikiPathways	WP560	TGF-beta receptor signaling	54	6	NFKB1|EP300|STAT3|FOS|STAT1|JUN	6.18e-09	4.19e-06
WikiPathways	WP4816	TGF-beta receptor signaling in skeletal dysplasias	58	6	NFKB1|EP300|STAT3|FOS|STAT1|JUN	9.18e-09	4.19e-06
WikiPathways	WP4659	Gastrin signaling pathway	114	7	NFKB1|SLC9A1|STAT3|EGFR|FOS|JUN|CREB1	1.46e-08	4.19e-06
WikiPathways	WP2374	Oncostatin M signaling pathway	65	6	NFKB1|STAT3|FOS|STAT1|CASP7|CREB1	1.73e-08	4.19e-06
WikiPathways	WP2037	Prolactin signaling pathway	76	6	NFKB1|STAT3|ERBB2|FOS|STAT1|JUN	4.15e-08	4.69e-06
WikiPathways	WP2526	PDGF pathway	40	5	NFKB1|STAT3|FOS|STAT1|JUN	7.22e-08	6.99e-06
WikiPathways	WP4298	Acute viral myocarditis	86	6	RAC2|STAT3|STAT1|CASP7|CXCR4|CREB1	8.31e-08	7.04e-06
WikiPathways	WP4263	Pancreatic adenocarcinoma pathway	87	6	NFKB1|RAC2|STAT3|ERBB2|EGFR|STAT1	8.86e-08	7.04e-06
WikiPathways	WP1984	Integrated breast cancer pathway	151	7	NFKB1|EP300|EGFR|STAT1|JUN|CREB1|BRCA1	9.25e-08	7.04e-06
WikiPathways	WP4666	Hepatitis B infection	151	7	NFKB1|EP300|STAT3|FOS|STAT1|JUN|CREB1	9.25e-08	7.04e-06
WikiPathways	WP138	Androgen receptor signaling pathway	88	6	EP300|STAT3|EGFR|JUN|CREB1|BRCA1	9.45e-08	7.04e-06
WikiPathways	WP2840	Hair follicle development: cytodifferentiation - part 3 of 3	88	6	NFKB1|EGFR|FOS|SPINK6|JUN|KLK13	9.45e-08	7.04e-06
WikiPathways	WP437	EGF/EGFR signaling pathway	162	7	STAT3|ERBB2|EGFR|FOS|STAT1|JUN|CREB1	1.47e-07	7.1e-06
WikiPathways	WP3646	Hepatitis C and hepatocellular carcinoma	49	5	NFKB1|STAT3|CASP7|JUN|BRCA1	1.84e-07	8.31e-06
WikiPathways	WP712	Estrogen signaling pathway	23	4	NFKB1|FOS|JUN|CREB1	4.88e-07	2.07e-05
WikiPathways	WP2032	Thyroid stimulating hormone (TSH) signaling pathway	66	5	STAT3|FOS|STAT1|JUN|CREB1	7.34e-07	2.93e-05
WikiPathways	WP2324	AGE/RAGE pathway	66	5	NFKB1|STAT3|EGFR|STAT1|JUN	7.34e-07	2.93e-05
WikiPathways	WP3303	RAC1/PAK1/p38/MMP2 pathway	67	5	NFKB1|STAT3|ERBB2|EGFR|CASP7	7.88e-07	2.93e-05
WikiPathways	WP3972	PDGFR-beta pathway	29	4	STAT3|FOS|STAT1|JUN	1.13e-06	3.82e-05
WikiPathways	WP5083	Neuroinflammation and glutamatergic signaling	140	6	NFKB1|STAT3|FOS|STAT1|IL4R|CREB1	1.28e-06	4.14e-05
WikiPathways	WP2034	Leptin signaling pathway	75	5	NFKB1|STAT3|ERBB2|STAT1|CREB1	1.33e-06	4.14e-05
WikiPathways	WP2380	Brain-derived neurotrophic factor (BDNF) signaling pathway	143	6	NFKB1|STAT3|FOS|STAT1|JUN|CREB1	1.44e-06	4.25e-05
WikiPathways	WP3995	Prion disease pathway	32	4	NFKB1|EP300|STAT3|CREB1	1.61e-06	4.55e-05
WikiPathways	WP4880	Host-pathogen interaction of human coronaviruses - interferon induction	33	4	NFKB1|FOS|STAT1|JUN	1.8e-06	4.89e-05
WikiPathways	WP3929	Chemokine signaling pathway	164	6	CCL22|NFKB1|RAC2|STAT3|STAT1|CXCR4	3.11e-06	8.1e-05
WikiPathways	WP127	IL-5 signaling pathway	40	4	STAT3|FOS|STAT1|JUN	3.66e-06	9.2e-05
WikiPathways	WP49	IL-2 signaling pathway	42	4	STAT3|FOS|STAT1|JUN	4.39e-06	0.00011
WikiPathways	WP3853	ERK pathway in Huntingtons disease	15	3	EGFR|CASP7|CREB1	1.03e-05	0.00024
WikiPathways	WP2018	RANKL/RANK signaling pathway	55	4	NFKB1|FOS|STAT1|JUN	1.2e-05	0.00027
WikiPathways	WP304	Kit receptor signaling pathway	59	4	EP300|STAT3|FOS|STAT1	1.55e-05	0.00034
WikiPathways	WP4585	Cancer immunotherapy by PD-1 blockade	23	3	NFKB1|STAT3|JUN	3.23e-05	0.00068
WikiPathways	WP1528	Physiological and pathological hypertrophy of the heart	24	3	STAT3|FOS|JUN	3.62e-05	0.00074
WikiPathways	WP4262	Breast cancer pathway	153	5	ERBB2|EGFR|FOS|JUN|BRCA1	3.72e-05	0.00074
WikiPathways	WP2261	Glioblastoma signaling pathways	82	4	EP300|ERBB2|EGFR|BRCA1	5.32e-05	0.001
WikiPathways	WP4559	Interactions between immune cells and microRNAs in tumor microenvironment	28	3	NFKB1|STAT3|IL4R	5.53e-05	0.001
WikiPathways	WP69	T-cell receptor (TCR) signaling pathway	89	4	NFKB1|FOS|JUN|CREB1	7.23e-05	0.0013
WikiPathways	WP1772	Apoptosis modulation and signaling	90	4	NFKB1|FOS|CASP7|JUN	7.54e-05	0.0013
WikiPathways	WP313	Hepatocyte growth factor receptor signaling	34	3	STAT3|FOS|JUN	9.46e-05	0.0016
WikiPathways	WP23	B cell receptor signaling pathway	97	4	NFKB1|RAC2|JUN|CREB1	9.97e-05	0.0017
WikiPathways	WP2868	TCA cycle nutrient use and invasiveness of ovarian cancer	5	2	STAT3|EGFR	0.00012	0.0019
WikiPathways	WP306	Focal adhesion	196	5	RAC2|TNC|ERBB2|EGFR|JUN	0.00012	0.0019
WikiPathways	WP75	Toll-like receptor signaling pathway	103	4	NFKB1|FOS|STAT1|JUN	0.00012	0.002
WikiPathways	WP2516	ATM signaling pathway	39	3	JUN|CREB1|BRCA1	0.00014	0.0021
WikiPathways	WP4564	Neural crest cell migration during development	39	3	STAT3|FOS|JUN	0.00014	0.0021
WikiPathways	WP3941	Oxidative damage response	40	3	NFKB1|C1S|C1R	0.00015	0.0022
WikiPathways	WP4172	PI3K-Akt signaling pathway	336	6	NFKB1|TNC|EGFR|IL4R|CREB1|BRCA1	0.00016	0.0023
WikiPathways	WP710	DNA damage response (only ATM dependent)	110	4	NFKB1|RAC2|ERBB2|JUN	0.00016	0.0023
WikiPathways	WP2036	TNF-related weak inducer of apoptosis (TWEAK) signaling pathway	42	3	NFKB1|CASP7|JUN	0.00017	0.0024
WikiPathways	WP4565	Neural crest cell migration in cancer	42	3	STAT3|FOS|JUN	0.00017	0.0024
WikiPathways	WP2332	Interleukin-11 signaling pathway	44	3	STAT3|STAT1|CREB1	0.00019	0.0026
WikiPathways	WP3931	Embryonic stem cell pluripotency pathways	116	4	STAT3|EGFR|FOS|JUN	0.00019	0.0026
WikiPathways	WP2586	Aryl hydrocarbon receptor Netpath	46	3	NFKB1|EP300|EGFR	0.00022	0.0028
WikiPathways	WP2873	Aryl hydrocarbon receptor pathway	46	3	EP300|EGFR|JUN	0.00022	0.0028
WikiPathways	WP2203	Thymic stromal lymphopoietin (TSLP) signaling pathway	47	3	NFKB1|STAT3|STAT1	0.00023	0.0029
WikiPathways	WP1559	Transcription factors regulate miRNAs related to cardiac hypertrophy	8	2	NFKB1|STAT3	0.00025	0.003
WikiPathways	WP286	IL-3 signaling pathway	49	3	STAT3|FOS|JUN	0.00026	0.0031
WikiPathways	WP3611	Photodynamic therapy-induced AP-1 survival signaling.	50	3	EGFR|FOS|JUN	0.00028	0.0032
WikiPathways	WP4217	Ebola virus pathway in host	129	4	NFKB1|EP300|EGFR|STAT1	0.00029	0.0033
WikiPathways	WP4146	Macrophage markers	9	2	RAC2|LYZ	0.0003	0.0034
WikiPathways	WP366	TGF-beta signaling pathway	132	4	EP300|TNC|FOS|JUN	0.00031	0.0035
WikiPathways	WP382	MAPK signaling pathway	245	5	NFKB1|RAC2|EGFR|FOS|JUN	0.00032	0.0035
WikiPathways	WP585	Interferon type I signaling pathways	53	3	STAT3|STAT1|CREB1	0.00033	0.0035
WikiPathways	WP2815	Mammary gland development pathway - Involution (Stage 4 of 4)	10	2	CHI3L1|STAT3	0.00037	0.0039
WikiPathways	WP1449	Regulation of toll-like receptor signaling pathway	139	4	NFKB1|FOS|STAT1|JUN	0.00038	0.004
WikiPathways	WP3863	T-cell antigen receptor (TCR) pathway during Staphylococcus aureus infection	60	3	NFKB1|FOS|JUN	0.00046	0.0048
WikiPathways	WP61	Notch signaling pathway (Netpath)	61	3	NFKB1|EP300|STAT3	0.00049	0.0049
WikiPathways	WP4495	IL-10 anti-inflammatory signaling pathway	12	2	STAT3|STAT1	0.0005	0.005
WikiPathways	WP4155	Endometrial cancer	63	3	ERBB2|EGFR|FOS	0.00053	0.0052
WikiPathways	WP289	Myometrial relaxation and contraction pathways	153	4	NFKB1|FOS|JUN|CREB1	0.00054	0.0052
WikiPathways	WP3651	Pathways affected in adenoid cystic carcinoma	64	3	EP300|ERBB2|BRCA1	0.00055	0.0053
WikiPathways	WP706	Sudden infant death syndrome (SIDS) susceptibility pathways	155	4	NFKB1|EP300|JUN|CREB1	0.00057	0.0053
WikiPathways	WP2881	Estrogen receptor pathway	13	2	STAT3|JUN	0.00058	0.0054
WikiPathways	WP3301	MFAP5-mediated ovarian cancer cell motility and invasiveness	13	2	JUN|CREB1	0.00058	0.0054
WikiPathways	WP4337	ncRNAs involved in STAT3 signaling in hepatocellular carcinoma	13	2	NFKB1|STAT3	0.00058	0.0054
WikiPathways	WP4919	Neuroinflammation	13	2	FOS|JUN	0.00058	0.0054
WikiPathways	WP3680	Physico-chemical features and toxicity-associated pathways	66	3	ERBB2|EGFR|JUN	0.0006	0.0054
WikiPathways	WP5039	SARS-CoV-2 innate immunity evasion and cell-specific immune response	66	3	NFKB1|EP300|STAT1	0.0006	0.0054
WikiPathways	WP4341	Non-genomic actions of 1,25 dihydroxyvitamin D3	71	3	NFKB1|STAT1|JUN	0.00074	0.0064
WikiPathways	WP4255	Non-small cell lung cancer	72	3	STAT3|ERBB2|EGFR	0.00077	0.0065
WikiPathways	WP4674	Head and neck squamous cell carcinoma	72	3	NFKB1|ERBB2|EGFR	0.00077	0.0065
WikiPathways	WP4216	Chromosomal and microsatellite instability in colorectal cancer	73	3	RAC2|FOS|JUN	0.0008	0.0066
WikiPathways	WP4928	MAPK pathway in congenital thyroid cancer	16	2	FOS|JUN	0.00084	0.0069
WikiPathways	WP22	IL-9 signaling pathway	17	2	STAT3|STAT1	0.00094	0.0076
WikiPathways	WP3678	Amplification and expansion of oncogenic pathways as metastatic traits	17	2	TNC|CXCR4	0.00094	0.0076
WikiPathways	WP3877	MYD88 distinct input-output pathway	18	2	NFKB1|JUN	0.001	0.0082
WikiPathways	WP4300	Extracellular vesicles in the crosstalk of cardiac cells	18	2	STAT3|EGFR	0.001	0.0082
WikiPathways	WP4560	MFAP5 effect on permeability and motility of endothelial cells via cytoskeleton rearrangement	18	2	JUN|CREB1	0.001	0.0082
WikiPathways	WP384	Apoptosis modulation by HSP70	19	2	NFKB1|CASP7	0.0011	0.0087
WikiPathways	WP4806	EGFR tyrosine kinase inhibitor resistance	83	3	STAT3|ERBB2|EGFR	0.0011	0.0087
WikiPathways	WP254	Apoptosis	84	3	NFKB1|CASP7|JUN	0.0012	0.0088
WikiPathways	WP4018	Clear cell renal cell carcinoma pathways	85	3	EP300|STAT3|EGFR	0.0012	0.009
WikiPathways	WP3927	BMP signaling in eyelid development	20	2	EGFR|JUN	0.0013	0.0092
WikiPathways	WP5098	T-cell activation SARS-CoV-2	86	3	NFKB1|FOS|JUN	0.0013	0.0092
WikiPathways	WP4970	Galanin receptor pathway	21	2	FOS|CREB1	0.0014	0.0098
WikiPathways	WP673	ErbB signaling pathway	90	3	ERBB2|EGFR|JUN	0.0014	0.0102
WikiPathways	WP2355	Corticotropin-releasing hormone signaling pathway	91	3	NFKB1|FOS|CREB1	0.0015	0.0104
WikiPathways	WP545	Complement activation	22	2	C1S|C1R	0.0015	0.0104
WikiPathways	WP231	TNF-alpha signaling pathway	92	3	NFKB1|CASP7|JUN	0.0015	0.0105
WikiPathways	WP3612	Photodynamic therapy-induced NFE2L2 (NRF2) survival signaling	23	2	FOS|JUN	0.0016	0.011
WikiPathways	WP2865	IL1 and megakaryocytes in obesity	24	2	NFKB1|S100A9	0.0018	0.0118
WikiPathways	WP205	IL-7 signaling pathway	25	2	STAT3|STAT1	0.0019	0.0126
WikiPathways	WP581	EPO receptor signaling	26	2	STAT3|STAT1	0.002	0.0134
WikiPathways	WP5090	Complement system in neuronal development and plasticity	105	3	CASP7|C1S|C1R	0.0022	0.0144
WikiPathways	WP4494	Selective expression of chemokine receptors during T-cell polarization	29	2	IL4R|CXCR4	0.0025	0.0161
WikiPathways	WP2870	Extracellular vesicle-mediated signaling in recipient cells	30	2	ERBB2|EGFR	0.0027	0.017
WikiPathways	WP4561	Cell migration and invasion through p75NTR	30	2	STAT3|JUN	0.0027	0.017
WikiPathways	WP2817	Mammary gland development pathway - Pregnancy and lactation (Stage 3 of 4)	31	2	ERBB2|EGFR	0.0028	0.0178
WikiPathways	WP2112	IL-17 signaling pathway	32	2	NFKB1|STAT3	0.003	0.0187
WikiPathways	WP3414	Initiation of transcription and translation elongation at the HIV-1 LTR	32	2	NFKB1|EP300	0.003	0.0187
WikiPathways	WP408	Oxidative stress response	32	2	NFKB1|FOS	0.003	0.0187
WikiPathways	WP4496	Signal transduction through IL1R	32	2	NFKB1|JUN	0.003	0.0187
WikiPathways	WP4874	CAMKK2 pathway	33	2	EP300|CREB1	0.0032	0.0191
WikiPathways	WP400	p38 MAPK signaling pathway	34	2	STAT1|CREB1	0.0034	0.02
WikiPathways	WP4877	Host-pathogen interaction of human coronaviruses - MAPK signaling	35	2	FOS|JUN	0.0035	0.0209
WikiPathways	WP3888	VEGFA-VEGFR2 signaling pathway	428	5	NFKB1|STAT3|STAT1|JUN|CREB1	0.0037	0.0214
WikiPathways	WP4329	miRNAs involvement in the immune response in sepsis	37	2	NFKB1|LCN2	0.0039	0.0228
WikiPathways	WP4331	Neovascularisation processes	37	2	NFKB1|CXCR4	0.0039	0.0228
WikiPathways	WP236	Adipogenesis	130	3	STAT3|STAT1|CREB1	0.004	0.0228
WikiPathways	WP4754	IL-18 signaling pathway	270	4	NFKB1|IL37|FOS|JUN	0.0041	0.0234
WikiPathways	WP4829	mBDNF and proBDNF regulation of GABA neurotransmission	38	2	STAT3|CREB1	0.0041	0.0234
WikiPathways	WP2828	Bladder cancer	40	2	ERBB2|EGFR	0.0046	0.0253
WikiPathways	WP314	Fas ligand pathway and stress induction of heat shock proteins	42	2	CASP7|JUN	0.005	0.0275
WikiPathways	WP364	IL-6 signaling pathway	43	2	STAT3|STAT1	0.0052	0.0285
WikiPathways	WP1971	Integrated cancer pathway	44	2	STAT1|BRCA1	0.0054	0.0295
WikiPathways	WP51	Regulation of actin cytoskeleton	149	3	RAC2|SLC9A1|EGFR	0.0058	0.031
WikiPathways	WP4008	NO/cGMP/PKG mediated neuroprotection	46	2	NFKB1|CREB1	0.0059	0.0316
WikiPathways	WP3932	Focal adhesion: PI3K-Akt-mTOR-signaling pathway	302	4	TNC|EGFR|IL4R|CREB1	0.0061	0.0324
WikiPathways	WP1541	Energy metabolism	47	2	EP300|CREB1	0.0062	0.0324
WikiPathways	WP2637	Interleukin-1 (IL-1) structural pathway	47	2	NFKB1|FOS	0.0062	0.0324
WikiPathways	WP4396	Nonalcoholic fatty liver disease	155	3	NFKB1|CASP7|JUN	0.0064	0.0332
WikiPathways	WP1533	Vitamin B12 metabolism	50	2	NFKB1|GIG25	0.0069	0.0353
WikiPathways	WP481	Insulin signaling	159	3	RAC2|FOS|JUN	0.0069	0.0353
WikiPathways	WP2882	Nuclear receptors meta-pathway	316	4	EP300|STAT3|EGFR|JUN	0.0071	0.0362
WikiPathways	WP2864	Apoptosis-related network due to altered Notch3 in ovarian cancer	53	2	NFKB1|CASP7	0.0077	0.0387
WikiPathways	WP195	IL-1 signaling pathway	54	2	NFKB1|JUN	0.008	0.0397
WikiPathways	WP2849	Hematopoietic stem cell differentiation	54	2	FOS|CXCR4	0.008	0.0397
WikiPathways	WP4205	MET in type 1 papillary renal cell carcinoma	58	2	STAT3|JUN	0.0091	0.0447
WikiPathways	WP558	Complement and coagulation cascades	58	2	C1S|C1R	0.0091	0.0447
WikiPathways	WP4223	Ras signaling	179	3	NFKB1|RAC2|EGFR	0.0094	0.0458
WikiPathways	WP2877	Vitamin D receptor pathway	182	3	KRT16|S100A8|S100A9	0.0099	0.0475
WikiPathways	WP4906	3q29 copy number variation syndrome	62	2	CASP7|JUN	0.0103	0.0492

## Sheet: ST9
Table S9. Drugs targeting (V)HE genes based on DrugBank database.
Drug	Targets	Target in VHE	Target type	Action	Indication	Adverse Events
Antithymocyte immunoglobulin (rabbit)	Major histocompatibility complex class I-related gene protein; Integrin alpha-L; T-lymphocyte activation antigen CD86; Low affinity immunoglobulin gamma Fc region receptor II-b; T-cell surface glycoprotein CD4; Integrin beta-1; Integrin alpha-V; Integrin beta-3; T-cell surface glycoprotein CD1a	CD1A	Main	inhibitor	For prevention of renal transplant rejection	Not known whether ATG (rabbit) distributes into human milk; however, other immunoglobulins are distributed into human milk.
Palivizumab	Fusion glycoprotein F0; Low affinity immunoglobulin gamma Fc region receptor III-B; Complement C1r subcomponent; Complement C1q subcomponent subunit A; Complement C1q subcomponent subunit B; Complement C1q subcomponent subunit C; Low affinity immunoglobulin gamma Fc region receptor III-A; High affinity immunoglobulin gamma Fc receptor I; Low affinity immunoglobulin gamma Fc region receptor II-b	C1R	Main	NA	For prophylaxis of respiratory diseases casued by respiratory syncytial virus.
Aspartic acid	Adenylosuccinate Synthetases; Calcium-binding mitochondrial carrier protein Aralar2; Aspartate aminotransferase, cytoplasmic; Aspartoacylase; Asparagine synthetase [glutamine-hydrolyzing]; Argininosuccinate synthase; Aminoacylase-1; Aspartate aminotransferase, mitochondrial; Aspartate--tRNA ligase, cytoplasmic; Calcium-binding mitochondrial carrier protein Aralar1; Aspartyl/asparaginyl beta-hydro…	LYZ	Main	NA	There is no support for the claim that aspartates are exercise performance enhancers, i.e. ergogenic aids.	Mild gastrointestinal side effects including diarrhea. LD50 (rat) > 5,000 mg/kg.
Icosapent	Prostaglandin G/H synthase 2; Prostaglandin G/H synthase 1; Peroxisome proliferator-activated receptor gamma; Peroxisome proliferator-activated receptor delta; Free fatty acid receptor 1; Sodium/calcium exchanger 1; Fatty acid-binding protein, brain; Fatty acid desaturase 1; Long-chain-fatty-acid--CoA ligase 4; Transient receptor potential cation channel subfamily V member 1; Peroxisome prolifera…	FABP7	Main	inhibitor	EPA can be used for lowering elevated triglycerides in those who are hyperglyceridemic. In addition, EPA may play a therapeutic role in patients with cystic fibrosis by reducing disease severity and may play a similar role in type 2 diabetics in slowing the progression of diabetic nephropathy.
Atorvastatin	3-hydroxy-3-methylglutaryl-coenzyme A reductase; Dipeptidyl peptidase 4; Aryl hydrocarbon receptor; Histone deacetylase 2; Nuclear receptor subfamily 1 group I member 3	DPP4	Main	inhibitor	Atorvastatin is indicated for the treatment of several types of dyslipidemias, including primary hyperlipidemia and mixed dyslipidemia in adults, hypertriglyceridemia, primary dysbetalipoproteinemia, homozygous familial hypercholesterolemia, and heterozygous familial hypercholesterolemia in adolescent patients with failed dietary modifications. Dyslipidemia describes an elevation of plasma choles…	The reported LD50 of oral atorvastatin in mice is higher than 5000 mg/kg.[MSDS] In cases of overdose with atorvastatin, there is reported symptoms of complicated breathing, jaundice, liver damage, dark urine, muscle pain, and seizures. In case of overdose, symptomatic treatment is recommended and due to the high plasma protein binding, hemodialysis is not expected to generate significant improvem…
Sitagliptin	Dipeptidyl peptidase 4	DPP4	Main	inhibitor	Sitagliptin is indicated as an adjunct to diet and exercise to improve glycemic control in adults with type 2 diabetes mellitus. It is not used to treat type 1 diabetes or patients with a history of pancreatitis. _x000D_ It is also used in combination with [metformin] or [ertugliflozin].	Animal studies in pregnancy have shown no adverse effects on the mother or offspring at normal doses, however these results are not always applicable to humans. There is currently a voluntary registry of fetal exposure. Animal studies at 100 times the maximum recommended human dose resulted in an increase in rib malformations. Sitagliptin is excreted in the milk of rats but it is not known if it …
Zinc	B1 bradykinin receptor; Methylated-DNA--protein-cysteine methyltransferase; Fructose-bisphosphate aldolase A; Elongation factor 1-alpha 1; Alpha-enolase; Glyceraldehyde-3-phosphate dehydrogenase, testis-specific; Nucleoside diphosphate kinase A; Protein disulfide-isomerase; Protein disulfide-isomerase A3; Peroxiredoxin-1; Phosphoserine phosphatase; Triosephosphate isomerase; Elongation factor Tu,…	S100A8; S100A9; C1R; C1S; KRT16; KRT6A; SERPINA3	Main	NA	Zinc can be used for the treatment and prevention of zinc deficiency/its consequences, including stunted growth and acute diarrhea in children, and slowed wound healing. It is also utilized for boosting the immune system, treating the common cold and recurrent ear infections, as well as preventing lower respiratory tract infections. _x000D_ _x000D_	According to the Toxnet database of the U.S. National Library of Medicine, the oral LD50 for zinc is close to 3 g/kg body weight, more than 10-fold higher than cadmium and 50-fold higher than mercury._x000D_ _x000D_ The LD50 values of several zinc compounds (ranging from 186 to 623 mg zinc/kg/day) have been measured in rats and mice.
Sucrose	Taste receptor type 1 member 2; Beta-lactamase; Lysozyme C; Actin, alpha skeletal muscle; Beta-glucosidase; Amylosucrase; Beta-lactamase; Beta-lactamase CTX-M; Heme oxygenase; Copper transport protein ATOX1; tRNA-splicing ligase RtcB homolog; Orange carotenoid-binding protein; Sucrose porin; Levansucrase	LYZ	Main	NA
Arsanilic acid	Lysozyme C	LYZ	Main	NA
Lauric acid	Genome polyprotein; Genome polyprotein; Genome polyprotein; Hepatocyte nuclear factor 4-alpha; Phospholipase A2, membrane associated; Very low-density lipoprotein receptor; Glycolipid transfer protein; 3-oxoacyl-[acyl-carrier-protein] synthase 2; Lactotransferrin; Protein TonB; Complement component C8 gamma chain; Group IID secretory phospholipase A2; Acyl-homoserine lactone acylase PvdQ; Lymphoc…	LTF	Main	NA
Propyl alcohol	Lysozyme C	LYZ	Main	NA
D-Serine	Glutamate receptor ionotropic, NMDA 1; Glycine receptor subunit alpha-1; Serpin B3; Head decoration protein	SERPINB3	Main	NA
Nimesulide	Prostaglandin G/H synthase 2; Group IIE secretory phospholipase A2; Lactotransferrin	LTF	Main	NA	For the treatment of acute pain, the symptomatic treatment of osteoarthritis and primary dysmenorrhoea in adolescents and adults above 12 years old.	Oral TDLO (human): 1.429 mg/kg; Oral TDLO (woman): 2 mg/kg; Oral LD50 (rat): 200 mg/kg; Oral LD50 (mouse): 392 mg/kg
Vildagliptin	Dipeptidyl peptidase 4	DPP4	Main	inhibitor	Vildagliptin is indicated in the treatment of type II diabetes mellitus in adults. As monotherapy, vildagliptin is indicated in adults inadequately controlled by diet and exercise alone and for whom metformin is inappropriate due to contraindications or intolerance. It is also indicated as dual therapy in combination with metformin, a sulphonylurea, or a thiazolidinedione in adults patients with …	The oral Lowest published toxic dose (TDLO) is 0.3 mg/kg in rats and 1 mg/kg in mice. _x000D_ There is limited information regarding overdose with vildagliptin. In one study, patients experienced muscle pain, mild and transient paresthesia, fever, edema, and a transient increase in lipase levels at a dose of 400 mg. At 600 mg, one subject experienced edema of the feet and hands and increases in c…
Alogliptin	Dipeptidyl peptidase 4	DPP4	Main	inhibitor	Indicated as an adjunct to diet and exercise to improve glycemic control in adults with type 2 diabetes mellitus.	Common adverse reactions (reported in ≥4% of patients treated with alogliptin 25 mg and more frequently than in patients who received placebo) are: nasopharyngitis, headache, and upper respiratory tract infection.
Saxagliptin	Dipeptidyl peptidase 4	DPP4	Main	inhibitor	Treatment of type 2 diabetes mellitus to improve glycemic control in combination with other agents or as monotherapy.	Adverse reactions reported in ≥5% of patients treated with saxagliptin and more commonly than in patients treated with placebo are: upper respiratory tract infection, urinary tract infection, and headache.
Human C1-esterase inhibitor	Complement C1r subcomponent; Complement C1s subcomponent; Plasma kallikrein; Coagulation factor XII; Coagulation factor XI; Tissue-type plasminogen activator; Prothrombin	C1R; C1S	Main	inhibitor	Intravenous and subcutaneous formulations of the human C1-esterase inhibitor are indicated for routine prophylaxis against acute attacks of hereditary angioedema in patients six years of age and older. It is also used to treat these in adult and adolescent patients with hereditary angioedema.
Parecoxib	Prostaglandin G/H synthase 2; Lactotransferrin	LTF	Main	NA	Used for short term perioperative pain control.
Linagliptin	Dipeptidyl peptidase 4	DPP4	Main	inhibitor	Linagliptin is indicated for the treatment of type II diabetes in addition to diet and exercise. It should not be used to treat type I diabetes or in diabetic ketoacidosis. An extended-release combination product containing empagliflozin, linagliptin, and metformin was approved by the FDA in January 2020 for the improvement of glycemic control in adults with type 2 diabetes mellitus when used adj…	No dosage adjustment is necessary based on race, age, weight, sex, renal impairment, or hepatic impairment._x000D_ _x000D_ Studies of efficacy and safety in pediatric populations were not included in the original drug approval but recent clinical trials show linagliptin to be well tolerated in patients 10 to 18 years old._x000D_ _x000D_ Animal studies showed an increased risk of lymphoma in femal…
Copper	Amyloid beta A4 protein; Adenosylhomocysteinase; Histone H2B type 1-C/E/F/G/I; Glyceraldehyde-3-phosphate dehydrogenase; Nucleoside diphosphate kinase A; Histone H1.4; Peroxiredoxin-1; Protein S100-A8; 40S ribosomal protein SA; Actin, cytoplasmic 2; Alpha-enolase; Elongation factor 1-alpha 1; Keratin, type II cytoskeletal 8; Protein disulfide-isomerase; Protein disulfide-isomerase A3; 60 kDa heat…	S100A8; HEPHL1; C1S	Main	NA|cofactor|NA	For use in the supplementation of total parenteral nutrition and in contraception with intrauterine devices [FDA Label].	Copper toxicity is belevied to be due to fenton-type redox reactions occuring with high copper concentrations which produce damaging reactive oxygen species.
Conestat alfa	Complement C1r subcomponent; Complement C1s subcomponent; Plasma kallikrein; Coagulation factor XII; Prothrombin; Coagulation factor XI; Tissue-type plasminogen activator	C1R; C1S	Main	inhibitor	For the treatment of acute attacks of hereditary angioedema (HAE) due to C1 esterase inhibitor deficiency in adults.	The common adverse reactions (≥ 2%) reported in clinical trials were headache, nausea, and diarrhea._x000D_ _x000D_ Serious arterial and venous thromboembolic (TE) events have been reported at the recommended dose of plasma derived C1 esterase inhibitor products in patients with risk factors. Risk factors may include the presence of an indwelling venous catheter/access device, prior history of th…
Tipiracil	Thymidine phosphorylase	TYMP	Main	inhibitor	Tipiracil, in combination with [trifluridine], is indicated for the treatment of adult patients with metastatic colorectal cancer who have been previously treated with fluoropyrimidine-, oxaliplatin- and irinotecan-based chemotherapy, an anti-VEGF biological therapy, and if RAS wild-type, an anti-EGFR therapy. This combination use is also used to treat metastatic gastric or gastroesophageal junct…	TAS-102 is a cytotoxic drug, therefore this combination drug can cause myelosupression, including neutropenia, anemia, thrombocytopenia, and febrile neutropenia. According to pre-clinical studies, TAS-102 presents also embryo-fetal toxicity.
Dupilumab	Interleukin-4 receptor subunit alpha; Interleukin-13; Interleukin-4	IL4R	Main	inhibitor	In the US, dupilumab is indicated for the treatment of patients aged six months and older with moderate-to-severe atopic dermatitis whose disease is not adequately controlled with topical prescription therapies or when those therapies are not advisable. In Europe and Canada, the drug for this indication is approved for patients aged six years and older. In Europe, patients six to 11 years of age …	There is limited data on the overdose of dupilumab. As there is no specific treatment for dupilumab, close monitoring of the patient with appropriate symptomatic treatment is advised in case of suspected overdosage.
Zinc acetate	B1 bradykinin receptor; Methylated-DNA--protein-cysteine methyltransferase; Fructose-bisphosphate aldolase A; Elongation factor 1-alpha 1; Alpha-enolase; Glyceraldehyde-3-phosphate dehydrogenase, testis-specific; Nucleoside diphosphate kinase A; Protein disulfide-isomerase; Protein disulfide-isomerase A3; Peroxiredoxin-1; Phosphoserine phosphatase; Triosephosphate isomerase; Elongation factor Tu,…	S100A8; S100A9; C1R; C1S; KRT16; KRT6A; SERPINA3	Main	NA	Zinc can be used for the treatment and prevention of zinc deficiency/its consequences, including stunted growth and acute diarrhea in children, and slowed wound healing. It is also utilized for boosting the immune system, treating the common cold and recurrent ear infections, as well as preventing lower respiratory tract infections. _x000D_ _x000D_	According to the Toxnet database of the U.S. National Library of Medicine, the oral LD50 for zinc is close to 3 g/kg body weight, more than 10-fold higher than cadmium and 50-fold higher than mercury._x000D_ _x000D_ The LD50 values of several zinc compounds (ranging from 186 to 623 mg zinc/kg/day) have been measured in rats and mice.
Zinc chloride	B1 bradykinin receptor; Methylated-DNA--protein-cysteine methyltransferase; Fructose-bisphosphate aldolase A; Elongation factor 1-alpha 1; Alpha-enolase; Glyceraldehyde-3-phosphate dehydrogenase, testis-specific; Nucleoside diphosphate kinase A; Protein disulfide-isomerase; Protein disulfide-isomerase A3; Peroxiredoxin-1; Phosphoserine phosphatase; Triosephosphate isomerase; Elongation factor Tu,…	S100A8; S100A9; C1R; C1S; SERPINA3	Main	regulator|regulator|modulator|modulator|binder	Zinc chloride injections are indicated for use total parenteral nutrition to maintain zinc serum levels and prevent deficiency syndromes.	Patients experiencing and overdose may present with hypotension, pulmonary edema, diarrhea, vomiting, jaundice, and oligouria. Overdose can be managed through symptomatic and supportive treatment which may include sodium calcium edetate and analgesics._x000D_ _x000D_ The oral LD50 in mice is 329 mg/kg and in rats is 350 mg/kg.
Zinc sulfate, unspecified form	B1 bradykinin receptor; Methylated-DNA--protein-cysteine methyltransferase; Fructose-bisphosphate aldolase A; Elongation factor 1-alpha 1; Alpha-enolase; Glyceraldehyde-3-phosphate dehydrogenase, testis-specific; Nucleoside diphosphate kinase A; Protein disulfide-isomerase; Protein disulfide-isomerase A3; Peroxiredoxin-1; Phosphoserine phosphatase; Triosephosphate isomerase; Elongation factor Tu,…	S100A8; S100A9; C1R; C1S; SERPINA3	Main	regulator|regulator|modulator|modulator|binder	Zinc sulfate is a common zinc supplement in parenteral nutrition.
Sutimlimab	Complement C1s subcomponent	C1S	Main	inhibitor	Sutimlimab is indicated to decrease the need for red blood cell transfusion due to hemolysis in adult patients with cold agglutinin disease.
Cetuximab	Epidermal growth factor receptor; Low affinity immunoglobulin gamma Fc region receptor III-B; Complement C1q subcomponent subunit A; Complement C1q subcomponent subunit B; Complement C1q subcomponent subunit C; Low affinity immunoglobulin gamma Fc region receptor III-A; High affinity immunoglobulin gamma Fc receptor I; Low affinity immunoglobulin gamma Fc region receptor II-a	EGFR	Linker	binder	Cetuximab indicated for the treatment of locally or regionally advanced squamous cell carcinoma of the head and neck in combination with radiation therapy. It is indicated for treating a recurrent locoregional disease or metastatic squamous cell carcinoma of the head and neck in combination with platinum-based therapy with fluorouracil. It is indicated for recurrent or metastatic squamous cell ca…	The intravenous LD50 is > 300 mg/kg in mice and > 200 mg/kg in rats. There is limited information on the overdose from cetuximab._x000D_ _x000D_ In clinical trials, cetuximab was associated with serious and fatal infusion reactions, cardiopulmonary arrest or sudden death, and serious dermatologic toxicities. Pulmonary toxicities, such as interstitial lung disease, interstitial pneumonitis with no…
Trastuzumab	Receptor tyrosine-protein kinase erbB-2	ERBB2	Linker	binder	For the adjuvant treatment of HER2-overexpressing breast cancer, trastuzumab is indicated in several clinical settings: as part of a treatment regimen consisting of doxorubicin, cyclophosphamide, and either paclitaxel or docetaxel; as part of a treatment regimen with docetaxel and carboplatin; or as monotherapy following multi-modality anthracycline-based therapy. _x000D_ Trastuzumab is indicated…	There is no experience with overdosage of trastuzumab in clinical trials - single doses >8 mg/kg have not been tested in humans. Trastuzumab can contribute to the development of ventricular dysfunction and congestive heart failure, particularly when used in combination (or temporally adjacent) to other cardiotoxic chemotherapies such as anthracyclines.
Adenosine phosphate	5'-AMP-activated protein kinase; Adenosine kinase; 5'-AMP-activated protein kinase subunit beta-1; Acetyl-coenzyme A synthetase, cytoplasmic; 5'-AMP-activated protein kinase catalytic subunit alpha-1; Adenylate cyclase type 1; Long-chain-fatty-acid--CoA ligase 1; Cyclic AMP-responsive element-binding protein 1; DNA; cAMP-specific 3',5'-cyclic phosphodiesterase 4B; Glycogen phosphorylase, liver fo…	CREB1	Linker	activator	For nutritional supplementation, also for treating dietary shortage or imbalance
Baclofen	Gamma-aminobutyric acid type B receptor subunit 2; C-X-C chemokine receptor type 4; Gamma-aminobutyric acid type B receptor subunit 1	CXCR4	Linker	allosteric modulator	Oral baclofen is indicated for the treatment of spasticity resulting from multiple sclerosis and is particularly useful for the relief of flexor spasms and concomitant pain, clonus, and muscular rigidity. It may also be used to treat patients with spinal cord injuries and other spinal cord diseases. Baclofen should not be used to treat skeletal muscle spasms resulting from rheumatic disorders. _x…	The oral LD50 in rats is 145 mg/kg. _x000D_ Baclofen withdrawal symptoms typically occur within hours to days following interruption of either oral or intrathecal drug formulations. Abrupt discontinuation of baclofen is not advised. Clinical manifestations of baclofen overdose may include altered mental status, somnolence, seizure, hypothermia, respiratory depression, and coma. Overdose from bacl…
Adapalene	Retinoic acid receptor beta; Retinoic acid receptor gamma; Retinoic acid receptor RXR-beta; Retinoic acid receptor RXR-gamma; Retinoic acid receptor RXR-alpha; Transcription factor AP-1; Toll-like receptor 2; Retinoic acid receptor alpha; Aspartate aminotransferase, cytoplasmic	JUN	Linker	antagonist	Adapalene is indicated for the topical treatment of acne vulgaris in patients aged 12 and over.	Toxicity information regarding adapalene is not readily available. Patients experiencing an overdose are at an increased risk of severe adverse effects such as redness, scaling, and skin discomfort. Symptomatic and supportive measures are recommended_x000D_. _x000D_ Adapalene has an acute oral LD50 in S-D rats and CD-1 mice of over 5000 mg/kg. The LD50 of 0.3% applied topically to Credo OF1 mice …
Lidocaine	Sodium channel protein type 10 subunit alpha; Sodium channel protein type 9 subunit alpha; Sodium channel protein type 5 subunit alpha; Epidermal growth factor receptor; Sodium channel protein type 4 subunit alpha; Alpha-1-acid glycoprotein 1; Alpha-1-acid glycoprotein 2	EGFR	Linker	antagonist	Lidocaine is an anesthetic of the amide group indicated for production of local or regional anesthesia by infiltration techniques such as percutaneous injection and intravenous regional anesthesia by peripheral nerve block techniques such as brachial plexus and intercostal and by central neural techniques such as lumbar and caudal epidural blocks.	Symptoms of overdose and/or acute systemic toxicity involves central nervous system toxicity that presents with symptoms of increasing severity. Patients may present initially with circumoral paraesthesia, numbness of the tongue, light-headedness, hyperacusis, and tinnitus. Visual disturbance and muscular tremors or muscle twitching are more serious and precede the onset of generalized convulsion…
Gefitinib	Epidermal growth factor receptor	EGFR	Linker	antagonist	For the continued treatment of patients with locally advanced or metastatic non-small cell lung cancer after failure of either platinum-based or docetaxel chemotherapies.	The acute toxicity of gefitinib up to 500 mg in clinical studies has been low. In non-clinical studies, a single dose of 12,000 mg/m2 (about 80 times the recommended clinical dose on a mg/m2 basis) was lethal to rats. Half this dose caused no mortality in mice. Symptoms of overdose include diarrhea and skin rash.
Framycetin	16S ribosomal RNA; 30S ribosomal protein S12; C-X-C chemokine receptor type 4	CXCR4	Linker	antagonist	For the treatment of bacterial blepharitis, bacterial bonjunctivitis, corneal injuries, corneal ulcers and meibomianitis. For the prophylaxis of ocular infections following foreign body removal
Erlotinib	Nuclear receptor subfamily 1 group I member 2; Epidermal growth factor receptor	EGFR	Linker	antagonist	Erlotinib is indicated for:_x000D_ _x000D_ - The treatment of metastatic non-small cell lung cancer (NSCLC) with tumors showing epidermal growth factor receptor (EGFR) exon 19 deletions or exon 21 (L858R) substitution mutations [FDA label]. _x000D_ _x000D_ - In combination with first-line treatment for patients diagnosed with locally advanced, unresectable or metastatic pancreatic cancer [FDA lab…	Symptoms of overdose include diarrhea, rash, and liver transaminase elevation. The most common adverse reactions (>50%) in NSCLC are rash, diarrhea, anorexia and fatigue. The most common adverse reactions (>50%) in pancreatic cancer are fatigue, rash, nausea and anorexia.
Vinblastine	Tubulin alpha-1A chain; Tubulin beta chain; Tubulin delta chain; Tubulin gamma-1 chain; Tubulin epsilon chain; Transcription factor AP-1	JUN	Linker	NA	For treatment of breast cancer, testicular cancer, lymphomas, neuroblastoma, Hodgkin's and non-Hodgkin's lymphomas, mycosis fungoides, histiocytosis, and Kaposi's sarcoma.	Oral, mouse: LD50 = 423 mg/kg; Oral, rat: LD50 = 305 mg/kg.
Niacin	Hydroxycarboxylic acid receptor 3; Hydroxycarboxylic acid receptor 2; Nicotinate-nucleotide pyrophosphorylase [carboxylating]; Nicotinamide N-methyltransferase	NNMT	Linker	binder	Niacin is indicated to prevent vitamin deficiencies in pediatric and adult patients receiving parenteral nutrition as part of multivitamin intravenous injections. Niacin oral tablets are indicated as a monotherapy or in combination with simvastatin or lovastatin to treat primary hyperlipidemia and mixed dyslipidemia. It can also be used to reduce the risk of nonfatal myocardial infarctions in pat…	Overdose of niacin may present with severe prolonged hypotension. Patients experiencing an overdose should be treated with supportive measures which may include intravenous fluids. _x000D_ The oral LD50 in the mouse is 3720mg/kg, in the rabbit is 4550mg/kg, in the rat is 7000mg/kg, and the dermal LD50 in the rat is >2000mg/kg.
Sulfasalazine	Arachidonate 5-lipoxygenase; Prostaglandin G/H synthase 2; Prostaglandin G/H synthase 1; Acetyl-CoA acetyltransferase, mitochondrial; Phospholipase A2; Cystine/glutamate transporter; Nuclear factor NF-kappa-B p105 subunit; Nuclear factor NF-kappa-B p100 subunit	NFKB1	Linker	inhibitor	In the US, sulfasalazine is indicated to treat mild to moderate ulcerative colitis and to prolong the remission period between acute attacks of ulcerative colitis. Sulfasalazine is also indicated as an adjunct therapy in severe ulcerative colitis. For the delayed-release tablet formulation, sulfasalazine is also indicated to treat rheumatoid arthritis in pediatric patients who have responded inad…	Two-year oral carcinogenicity studies were conducted in male and female F344/N rats and B6C3F1 mice. Sulfasalazine was tested at 84 (496 mg/m2), 168 (991 mg/m2), and 337.5 (1991 mg/m2) mg/kg/day doses in rats. A statistically significant increase in the incidence of urinary bladder transitional cell papillomas was observed in male rats. In female rats, two (4%) of the 337.5 mg/kg rats had transit…
Pseudoephedrine	Sodium-dependent noradrenaline transporter; Sodium-dependent dopamine transporter; Alpha-1A adrenergic receptor; Alpha-2A adrenergic receptor; Sodium-dependent serotonin transporter; Beta-2 adrenergic receptor; Beta-1 adrenergic receptor; Nuclear factor of activated T-cells, cytoplasmic 1; Tumor necrosis factor; Nuclear factor NF-kappa-B p105 subunit; activator protein 1; Interleukin-2	NFKB1	Linker	inhibitor	Pseudoephedrine is a sympathomimetic amine used for its decongestant activity.	The oral LD50 of pseudoephedrine is 2206mg/kg in rats and 726mg/kg in mice._x000D_ _x000D_ Patients experiencing an overdose of pseudoephedrine may present with giddiness, headache, nausea, vomiting, sweating, thirst, tachycardia, precordial pain, palpitations, difficulty urinating, muscle weakness, muscle tension, anxiety, restlessness, insomnia, toxic psychosis, cardiac arrhythmias, circulatory…
Irbesartan	Type-1 angiotensin II receptor; Transcription factor AP-1	JUN	Linker	NA	Irbesartan is indicated to treat hypertension and diabetic nephropathy in hypertensive patients with type 2 diabetes, elevated serum creatinine, and proteinuria. A combination product with hydrochlorothiazide is indicated for hypertension in patients with uncontrolled hypertension with monotherapy or first line in patients not expected to be well controlled with monotherapy.	The oral TDLO in humans is 30mg/kg/6W. _x000D_ Symptoms of overdose include hypotension and tachycardia or bradycardia. Terlipressin may be given to treat hypotension and tachycardia if conventional vasopressors fail to control blood pressure.
Arsenic trioxide	Inhibitor of nuclear factor kappa-B kinase subunit beta; Thioredoxin reductase 1, cytoplasmic; Transcription factor AP-1; G1/S-specific cyclin-D1; Mitogen-activated protein kinase 3; Mitogen-activated protein kinase 1; RAC-alpha serine/threonine-protein kinase; Cyclin-dependent kinase inhibitor 1; Histone deacetylase 1; Protein PML	JUN	Linker	inducer	For induction of remission and consolidation in patients with acute promyelocytic leukemia (APL), and whose APL is characterized by the presence of the t(15;17) translocation or PML/RAR-alpha gene expression	Symptoms of overdose include convulsions, muscle weakness and confusion.
Naloxone	Mu-type opioid receptor; Delta-type opioid receptor; Kappa-type opioid receptor; Cyclic AMP-responsive element-binding protein 1; Estrogen receptor alpha; Toll-like receptor 4; Liver carboxylesterase 1	CREB1	Linker	NA	Naloxone nasal sprays are indicated for the emergency treatment of an opioid overdose or suspected opioid overdose. Intramuscular, intravenous, and subcutaneous injections are indicated for complete or partial reversal of opioid depression, diagnosis of known or suspected opioid overdose, and as an adjunct therapy in the treatment of septic shock._x000D_ _x000D_ Sublingual tablets and films are f…	If a patient has not taken opioids, naloxone does not have a significant effect on patients. _x000D_ The oral LD50 in mice and rats is >1 g/kg. The intraperitoneal LD50 is 80 mg/kg in mice and 239 mg/kg in rats. The subcutaneous LD50 is 286 mg/kg in mice and 500 mg/kg in rats.
Lapatinib	Epidermal growth factor receptor; Receptor tyrosine-protein kinase erbB-2	EGFR; ERBB2	Linker	antagonist|antagonist	Indicated in combination with capecitabine for the treatment of patients with advanced or metastatic breast cancer whose tumors overexpress the human epidermal receptor type 2 (HER2) protein and who have received prior therapy including an anthracycline, a taxane, and trastuzumab.	There has been a report of one patient who took 3,000 mg of lapatinib for 10 days. This patient had grade 3 diarrhea and vomiting on day 10.
Panitumumab	Epidermal growth factor receptor	EGFR	Linker	suppressor	For the treatment of EGFR-expressing, metastatic colorectal carcinoma that is refractory to fluoropyrimidine-, oxaliplatin-, and irinotecan- containing chemotherapy regimens.	Panitumumab was shown to cause skin, ocular and mucosal related toxicities in 90% of patients receiving panitumumab. Subsequent to the development of severe dermatologic toxicities, infectious complications, including sepsis, septic death, and abscesses requiring incisions and drainage, were reported.
Vandetanib	Vascular endothelial growth factor A; Epidermal growth factor receptor; Protein-tyrosine kinase 6; Angiopoietin-1 receptor; Proto-oncogene tyrosine-protein kinase receptor Ret	EGFR	Linker	inhibitor	Vandetanib is currently approved as an alternative to local therapies for both unresectable and disseminated disease. Because Vandetanib can prolong the Q-T interval, it is contraindicated for use in patients with serious cardiac complications such as congenital long QT syndrome and uncompensated heart failure.
Trastuzumab emtansine	Receptor tyrosine-protein kinase erbB-2	ERBB2	Linker	antibody	Used in HER2-positive, metastatic breast cancer patients who have already used taxane and/or trastuzumab for metastatic disease or had their cancer recur within 6 months of adjuvant treatment._x000D_ _x000D_	The FDA label includes a black box warning of serious side effects such as hepatotoxicity, embryo-fetal toxicity, and cardiac toxicity.
Pertuzumab	Receptor tyrosine-protein kinase erbB-2	ERBB2	Linker	binder	Pertuzumab is indicated for intravenous administration in combination with [trastuzumab] and [docetaxel] for the treatment of patients with HER2-positive metastatic breast cancer who have not received prior anti-HER2 therapy or chemotherapy for metastatic disease. It is also indicated in combination with trastuzumab and other chemotherapies for the neoadjuvant treatment of HER2-positive locally a…	There are no data regarding overdose of pertuzumab. Single doses higher than 25 mg/kg have not been tested. Symptoms of overdose are likely to be consistent with pertuzumab's adverse effect profile, and may therefore involve significant diarrhea, alopecia, neutropenia, nausea, fatigue, rash, and/or peripheral neuropathy. Pertuzumab has been associated with the development of left ventricular dysf…
Plerixafor	C-X-C chemokine receptor type 4	CXCR4	Linker	antagonist	Used in combination with granulocyte-colony stimulating factor (G-CSF, filgrastim) to mobilize hematopoietic stem cells to the peripheral blood for collection and subsequent autologous transplantation in patients with non-Hodgkin’s lymphoma (NHL) and multiple myeloma (MM).	LD50, mouse, SC: 16.3 mg/kg;_x000D_ LD50, rat, SC: >50 mg/kg;_x000D_ LD50, mouse and rat, IV injection: 5.2 mg/kg _x000D_
Nandrolone decanoate	Androgen receptor; Proto-oncogene c-Fos; 5-hydroxytryptamine 2 receptor; 5-hydroxytryptamine receptor 1B; Insulin-like growth factor 1 receptor; Dopamine receptor	FOS	Linker	inducer	Nandrolone decanoate is indicated in the management of anemia of renal insufficiency. In Canada, it is also indicated as an adjunct therapy in the treatment of senile and postmenopausal osteoporosis.	Data regarding acute overdose of nandrolone decanoate are not readily available. However, patients experiencing a chronic overdose of anabolic steroids may experience adverse effects including suppression of testosterone and spermatogenesis, shrinking of testicles, decreased libido, and erectile dysfunction in men; and suppressed estrogen, progesterone, and ovulation, amenorrhea, and clitoromegal…
Nadroparin	Antithrombin-III; P-selectin; Proto-oncogene c-Fos; Myc proto-oncogene protein	FOS	Linker	inhibitor	Nadroparin is used for prophylaxis of thromboembolic disorders and general surgery in orthopedic surgery, treatment of deep vein thrombosis, prevention of clotting during hemodialysis and treatment of unstable angina and non-Q wave myocardial infarction.	Osteopenia with extended use, skin necrosis, thrombocytosis, severe immunologically-mediated thrombocytopenia, eosinophilia (rare), calcinosis rarely occurs at the injection site, severe bleeding, transient elevation of liver transaminases.
Triflusal	Prostaglandin G/H synthase 1; Nuclear factor NF-kappa-B p105 subunit; Nitric oxide synthase, inducible; cAMP and cAMP-inhibited cGMP 3',5'-cyclic phosphodiesterase 10A	NFKB1	Linker	antagonist	Triflusal is indicated as prophylaxis of thromboembolic disorders. It has been registered in Spain and in other countries of Europe, South America and South Korea for the prevention of Stroke and myocardial infarction.	There is the possibility of producing major systemic hemorrhages.
Afatinib	Epidermal growth factor receptor; Receptor tyrosine-protein kinase erbB-2; Receptor tyrosine-protein kinase erbB-4	EGFR; ERBB2	Linker	inhibitor|inhibitor	Afatinib is a kinase inhibitor indicated as monotherapy for the first-line [FDA Label] treatment of (a) Epidermal Growth Factor Receptor (EGFR) TKI (tyrosine kinase inhibitor)-naive adult patients with locally advanced or metastatic non-small cell lung cancer (NSCLC) whose tumours have non-resistant EGFR mutations as detected by an FDA-approved test [FDA Label], and (b) adult patients with locall…	Most common adverse reactions (≥20%) are diarrhea, rash/dermatitis, acneiform, stomatitis, paronychia, dry skin, decreased appetite, pruritus [FDA Label]._x000D_ _x000D_ Conversely, overdose in 2 healthy adolescents involving the ingestion of 360 mg each of afatinib (as part of a mixed drug ingestion) was associated with adverse events of nausea, vomiting, asthenia, dizziness, headache, abdominal…
Osimertinib	Epidermal growth factor receptor	EGFR	Linker	inhibitor	Osimertinib is indicated as adjuvant therapy after tumor resection in adult patients with non-small cell lung cancer (NSCLC) whose tumors have epidermal growth factor receptor (EGFR) exon 19 deletions or exon 21 L858R mutations (as detected by an FDA-approved test), and as the first-line treatment of adult patients with metastatic NSCLC whose tumors have EGFR exon 19 deletions or exon 21 L858R mu…	Across clinical trials, interstitial lung disease (ILD)/pneumonitis occurred in 3.7% of treated patients with 0.3% of these being fatal. There is also a change of QTc interval prolongation; electrocardiogram and electrolytes should be monitored in patients with a history or predisposition for QTc prolongation. Cardiomyopathy occurred in 3% of patients, therefore left ventricular ejection fraction…
Necitumumab	Epidermal growth factor receptor	EGFR	Linker	antagonist	Necitumumab is approved for use in combination with cisplatin and gemcitabine as a first-line treatment for metastatic squamous non-small cell lung cancer (NSCLC). It is not indicated for treatment of non-squamous NSCLC.	The poor safety profile of necitumumab has been one of the major limitations of its use. Rigorous monitoring of the following adverse events is recommended for the use of this drug: cardiopulmonary arrest, hypomagnesia, venous and arterial thromboembolic events, dermatologic toxicities, and infusion-related reactions. Due to observations of increased toxicity and mortality in treatment of non-squ…
Foreskin keratinocyte (neonatal)	Fibroblast growth factor 1; Epidermal growth factor receptor; Granulocyte-macrophage colony-stimulating factor receptor subunit alpha; Interleukin-1 beta; Interleukin-6; Interferon gamma; Platelet-derived growth factor receptor alpha; TGF-beta receptor type-2; Transforming growth factor beta-1; Tumor necrosis factor; Vascular endothelial growth factor A; Fibroblast growth factor receptor 2	EGFR	Linker	agonist	For chronic leg ulcers and diabetic foot. _x000D_ _x000D_ Orcel is indicated for use with standard therapeutic compression for the treatment of non-infected partial and full-thickness skin ulcers due to venous insufficiency of greater than 1 month in duration and which have not effectively responded to conventional ulcer therapy. Orcel is also for use with standard diabetic foot ulcer care for th…	Adverse events in a preclinical study of about 300 subjects were classified as mild, moderate, severe or life-threatening. In the venous leg ulcer study, 1 life-threatening infection and 3 severe infections reported in the Apligraf group occurred, and none in the control group. Of the 4 events, 2 severe infections were related to treatment: however one occurred one month after the last applicatio…
Tucatinib	Receptor tyrosine-protein kinase erbB-2; Receptor tyrosine-protein kinase erbB-3	ERBB2	Linker	inhibitor	Tucatinib is indicated with trastuzumab and capecitabine for treatment of adults diagnosed with advanced unresectable or metastatic HER2-positive breast cancer. This includes patients with brain metastases and those who have received one or more prior anti-HER2-based regimens in the metastatic setting.	LD50 information and overdose information for tucatinib are not readily available in the literature. In the case of an overdose with this drug, increased adverse effects, such as diarrhea, nausea, abdominal pain, vomiting fatigue, hepatotoxicity, vomiting, decreased appetite, anemia, headache, and rash are expected.
Neratinib	Epidermal growth factor receptor	EGFR	Linker	inhibitor	For use as an extended adjuvant treatment in adult patients with early stage HER2-overexpressed/amplified breast cancer, to follow adjuvant trastuzumab-based therapy [FDA Label].	Use of neratinib may produce diarrhea and hepatotoxicity as clinically significant adverse effects [FDA Label]. Serious adverse reactions in the neratinib arm of the clinical trials included diarrhea (1.6%), vomiting (0.9%), dehydration (0.6%), cellulitis (0.4%), renal failure (0.4%), erysipelas (0.4%), alanine aminotransferase increase (0.3%), aspartate aminotransferase increase (0.3%), nausea (…
Dacomitinib	Epidermal growth factor receptor	EGFR	Linker	inhibitor	Dacomitinib is indicated as the first-line treatment of patients with metastatic non-small cell lung cancer (NSCLC) with epidermal growth factor receptor (EGFR) exon 19 deletion or exon 21 L858R substitution mutations as verified by an FDA-approved test. _x000D_ Lung cancer is the leading cause of cancer death and NSCLC accounts for 85% of lung cancer cases. From the cases of NSCLC, approximately…	The maximum asymptomatic dose in rats was 50 mg/kg [MSDS]. In animal studies, dacomitinib was shown to induce embryo-fetal toxicity, as demonstrated by an increased incidence of a post-implantation loss and reduced fetal body weight at doses resulting in exposures near the exposure at the 45mg human dose following administration in rats during the period of organogenesis. On the other hand, dacom…
Fostamatinib	Tyrosine-protein kinase SYK; Adenosine receptor A3; vesicular monoamine transporter 2 (VMAT2); Fatty-acid amide hydrolase 1; Equilibrative nucleoside transporter 1; UDP-glucuronosyltransferase 1-1; cGMP-specific 3',5'-cyclic phosphodiesterase; Arachidonate 5-lipoxygenase; Cathepsin S; Cathepsin L1; Tyrosine-protein kinase ABL1; Calcium-dependent protein kinase 1; Serine/threonine-protein kinase P…	EGFR; ERBB2	Linker	inhibitor|inhibitor	Fostamatinib is indicated for use in the treatment of chronic immune thrombocytopenia (ITP) in patients who have had insufficient response to previous therapy [FDA Label].	Neither fostamatinib or R406 were found to be carcinogenic or mutagenic [FDA Label]. Fostamatinib can cause embryo-fetal mortality or developmental abnormalities at exposures of 0.3-10 times the maximum recommended human dose._x000D_ _x000D_ Serious adverse effects include hypertension, neutropenia, diarrhea, and hepatotoxicity [FDA Label]
Brigatinib	ALK tyrosine kinase receptor; Epidermal growth factor receptor; Tyrosine-protein kinase ABL1; Insulin-like growth factor 1 receptor; Receptor-type tyrosine-protein kinase FLT3; Insulin receptor; Hepatocyte growth factor receptor; Receptor tyrosine-protein kinase erbB-4; Receptor tyrosine-protein kinase erbB-2	EGFR; ERBB2	Linker	inhibitor|inhibitor	The anaplastic lymphoma kinase positive, metastatic non-small cell lung cancer (ALK+ NSCLC), represents only 3-5% of the NSCLC cancer cases, but the ALK mutation, overexpression and presence in several oncogenic fusion proteins in solid and hematologic tumors have pointed out the importance as well as its potential as a cancer therapy target. The ALK-related cases of NSCLC are associated with the…	Treatment with brigatinib generated not mutagenic chromosomal damage. Testicular toxicity, reported as lower weight of seminal vesicles and prostate gland, testicular tubular degeneration and lower weight as well as reduced size of testes with evidence of hypoespermatogenesis.[FDA label]
Ibalizumab	C-C chemokine receptor type 5; C-X-C chemokine receptor type 4; T-cell surface glycoprotein CD4	CXCR4	Linker	antagonist	Indicated for the treatment of human immunodeficiency virus type 1 (HIV-1) infection in highly treatment-experienced adults with multidrug-resistant HIV-1 infection failing their current antiretroviral regimen [FDA label]._x000D_ _x000D_ The approval of Trogarzo was supported by a clinical trial of 40 treatment-experienced adults with MDR HIV-1 infection who persistently had elevated levels of HI…	Immune reconstitution inflammatory syndrome has been reported in one patient treated with TROGARZO in combination with other antiretrovirals. During the initial phase of combination antiretroviral therapies, patients whose immune systems respond may develop an inflammatory response to indolent or residual opportunistic infections, which may necessitate further evaluation and treatment [FDA label].
Margetuximab	Receptor tyrosine-protein kinase erbB-2	ERBB2	Linker	antagonist	Margetuximab is an anti-HER2 monoclonal antibody indicated, in combination with chemotherapy, for the treatment of metastatic HER2-positive breast cancer in adult patients who have received two or more prior anti-HER2 regimens with at least one prior regimen for metastatic disease.	Toxicity information regarding margetuximab is not readily available. Patients experiencing an overdose are at an increased risk of severe adverse effects such as infusion-related reactions. Symptomatic and supportive measures are recommended.
Zanubrutinib	Tyrosine-protein kinase BTK; Epidermal growth factor receptor; Receptor tyrosine-protein kinase erbB-2; Receptor tyrosine-protein kinase erbB-4; Tyrosine-protein kinase ITK/TSK; Cytoplasmic tyrosine-protein kinase BMX; Tyrosine-protein kinase JAK2; Tyrosine-protein kinase Tec; Tyrosine-protein kinase Blk; Tyrosine-protein kinase JAK3; Protein-tyrosine kinase 6; Tyrosine-protein kinase Fgr; Tyrosi…	EGFR; ERBB2	Linker	inhibitor|inhibitor	Zanubrutinib is indicated for the treatment of adult patients with mantle cell lymphoma (MCL) who have received at least one prior therapy. _x000D_ It is used to treat Waldenström’s macroglobulinemia in adults. _x000D_ Zanubrutinib is also indicated for the treatment of relapsed or refractory marginal zone lymphoma (MZL) in adults who have received at least one anti-CD20-based regimen.	There is limited data on zanubrutinib overdose.
Golodirsen	Dystrophin	DMD	Linker	inducer	Golodirsen is indicated to treat Duchenne muscular dystrophy (DMD) in patients with a confirmed mutation of the DMD gene that would benefit from exon 53 skipping. Continued FDA approval of this drug is contingent upon the results of clinical trials to confirm its benefit.	No overdose information is available, however, renal toxicity has been seen with the administration of antisense oligomers, sometimes resulting in fatal glomerulonephritis. In the case of an overdose, it is advisable to provide supportive care and monitor renal function. LD50 information is currently unavailable for this drug.
Mobocertinib	Epidermal growth factor receptor	EGFR	Linker	inhibitor	Mobocertinib is indicated for the treatment of adult patients with locally advanced or metastatic non-small cell lung cancer (NSCLC) with epidermal growth factor receptor (EGFR) exon 20 insertion mutations whose disease has progressed on or after platinum-based chemotherapy.	No data are available regarding overdosage with mobocertinib. Symptoms of overdosage are likely to be consistent with mobocertinib's adverse effects and may therefore include significant gastrointestinal symptoms, pain, fatigue, and rash.
Amivantamab	Epidermal growth factor receptor; Hepatocyte growth factor receptor; Low affinity immunoglobulin gamma Fc region receptor III-A	EGFR	Linker	antibody	Amivantamab is indicated in the treatment of adult patients with locally advanced or metastatic non-small cell lung cancer (NSCLC) with epidermal growth factor receptor (EGFR) exon 20 insertion mutations, whose disease has progressed on or after platinum-based chemotherapy.	Data regarding overdoses of amivantamab are not readily available. Patients experiencing an overdose should be treated with symptomatic and supportive measures.

[truncated: 4 more sheets: ST10, ST11, ST12, ST13]
